# Supplementary material
Source: PubMed Central journal article supplement (PMC7611356)
Supplement: EMS115907-supplement-Supporting_information.pdf [file EMS115907-supplement-Supporting_information.pdf]

## Supporting Information

### **Optimal His-tag design for efficient [ $^{99m}\text{Tc}(\text{CO})_3$ ] $^+$ and [ $^{188}\text{Re}(\text{CO})_3$ ] $^+$ labeling of proteins for molecular imaging and radionuclide therapy by analysis of peptide arrays.**

Jennifer D. Williams,<sup>1</sup> Florian Kampmeier,<sup>1</sup> Adam Badar,<sup>1</sup> Kevin Howland,<sup>2</sup> Margaret S. Cooper,<sup>1</sup>  
Gregory E. D. Mullen,<sup>1</sup> Philip J. Blower<sup>1\*</sup>

<sup>1</sup>King's College London, School of Biomedical Engineering and Imaging Sciences, 4<sup>th</sup> Floor  
Lambeth Wing, St Thomas' Hospital, London SE1 7EH, UK

<sup>2</sup>Biomolecular Science Facility, University of Kent, Canterbury, CT2 7NJ, UK

\*Corresponding Author: Prof Phil Blower; [Philip.blower@kcl.ac.uk](mailto:Philip.blower@kcl.ac.uk)

## Background

**Table S1.** Summary of literature methods and radiochemical yields for labeling proteins with  $[^{99m}\text{Tc}][\text{Tc}(\text{CO})_3]^+$ . RY = radiochemical yield; RP = radiochemical purity (post-purification where purification was required).

| Ref.                            | Labelling Conditions                                           | Labelling time | RY (%) | Purification required | RP (%) | Specific Activity |
|---------------------------------|----------------------------------------------------------------|----------------|--------|-----------------------|--------|-------------------|
| Mees et al. 2012 (1)            | 37°C, blown dry with N <sub>2</sub>                            | 1-1.5 h        | 40-50% | Yes                   | >95%   | 8.9-10.4 MBq/μg   |
| Shah et al. 2012 (2)            | 37°C, PBS at pH 7.4                                            | 2 h            | 98%    |                       |        |                   |
| Cortez-Retamozo et al. 2008 (3) | 52°C, CO <sub>3</sub> <sup>2-</sup> buffer pH 8 and PBS pH 7.4 | 1 h            |        | Often                 | 98%    |                   |
| Teran et al. 2011 (4)           | 50°C, H <sub>2</sub> O for                                     | 50 min         | 95%    |                       |        | 20 mCi/μg         |
| Orlova et al. 2006 (5)          | 50°C, PBS buffer                                               | 40 min         | 60%    |                       |        |                   |
| Deyev et al. 2003 (6)           |                                                                |                | 95%    |                       |        | 2GBq/mg           |
| Tait et al. 2002 (7)            | 37°C, 0.5/0.1M HEPES pH 7.4                                    | 1 h            | 80%    | Yes                   | 98%    |                   |
| Chen et al. 2008 (8)            | 37°C                                                           | 3 h            | 90%    | Yes                   | 90%    |                   |
| Tavare et al. 2009 (9)          | 37°C, PBS, pH 7.4                                              | 30 min         | 95%    | Yes                   | 100%   |                   |
| Zahnd et al. 2010 (10)          | 37°C, 0.6M phosphate buffer, pH 7                              | 1 h            |        |                       |        |                   |
| Tolmachev et al. 2010 (11)      | 50°C, PBS                                                      | 1 h            | 80%    | Yes                   | 95%    | 2 MBq/μg          |
| Bidlingmaier et al. 2009 (12)   | 37°C, PBS buffer                                               | 1 h            |        | Yes                   |        |                   |
| Berndorff et al. 2006 (13)      | 37°C, 0.1M HEPES and PBS                                       | 1 h            | 54%    | Yes                   | 91%    | 21 MBq/μmol       |

## Results

**Table S2 (continues over page).** Peptide sequences in the Celluspot<sup>TM</sup> Serine/Threonine Kinase Substrate I (STKS1) and their positions on the glass slide. Peptide sequences containing his residues are highlighted in red. The grid layout to which grid positions refer is shown in Table S3.

| <i>no</i> | <i>Grid position</i> | <i>kinase</i> | <i>sequence</i>                      | <i>to array</i> |
|-----------|----------------------|---------------|--------------------------------------|-----------------|
| 1         | A 1                  | control       | <b>N-W-S-H-P-Q-F-E-K-X-X-X-X</b>     | ▶               |
| 2         | A 2                  | neg. control  | .space                               | ▶               |
| 3         | A 3                  | 70-kDakinase  | Q-N-R-S-G-A-M-S-P-M-S-W-N-S-D        | ▶               |
| 4         | A 4                  | AFK           | E-R-G-Y-S-F-T-T-T-A-E-R-E-I-V        | ▶               |
| 5         | A 5                  | AMPK_group    | T-L-V-N-R-K-V-S-Q-R-R-V-D-F-C        | ▶               |
| 6         | A 6                  | AMPK_group    | <b>S-Q-R-Q-R-S-T-S-T-P-N-V-H-M-V</b> | ▶               |
| 7         | A 7                  | AMPK_group    | S-P-R-V-R-T-L-S-G-S-R-P-P-L-L        | ▶               |
| 8         | A 8                  | AMPK_group    | <b>Y-V-A-S-N-R-R-S-I-F-F-R-T-S-H</b> | ▶               |
| 9         | A 9                  | AMPK_group    | S-D-G-E-F-L-R-T-S-C-G-S-P-N-Y        | ▶               |
| 10        | A10                  | AMPK_group    | P-V-R-M-R-R-N-S-F-T-P-L-S-S-S        | ▶               |
| 11        | A11                  | AMPK_group    | <b>S-S-G-S-P-A-N-S-F-H-F-K-E-A-W</b> | ▶               |
| 12        | A12                  | AMPK_group    | G-K-I-K-R-L-R-S-Q-V-Q-V-S-L-E        | ▶               |
| 13        | A13                  | AMPK_group    | S-P-R-R-R-R-R-ST-F-S-S-L-S-N-S       | ▶               |
| 14        | A14                  | ATM           | P-Y-P-G-I-D-L-S-Q-V-Y-E-L-L-E        | ▶               |
| 15        | A15                  | ATM           | S-L-A-F-E-E-G-S-Q-S-T-T-I-S-S        | ▶               |
| 16        | A16                  | ATM           | <b>Q-K-G-E-L-S-R-S-P-S-P-F-T-H-T</b> | ▶               |
| 17        | A17                  | ATM           | E-N-V-K-Y-S-S-S-Q-P-E-P-R-T-G        | ▶               |
| 18        | A18                  | ATM           | K-D-L-K-L-G-V-S-Q-Q-T-I-F-S-V        | ▶               |
| 19        | A19                  | ATM           | E-Q-Q-L-F-Y-I-S-Q-P-G-S-S-V-V        | ▶               |
| 20        | A20                  | ATM           | A-L-R-L-L-D-S-S-Q-I-V-I-I-S-A        | ▶               |
| 21        | A21                  | ATM           | S-Q-E-S-E-D-Y-S-Q-P-S-T-S-S-S        | ▶               |
| 22        | A22                  | ATM           | E-T-W-S-L-P-L-S-Q-N-S-A-S-E-L        | ▶               |
| 23        | A23                  | ATM           | <b>L-S-D-T-D-S-H-S-Q-D-L-G-S-P-E</b> | ▶               |
| 24        | A24                  | ATM           | <b>S-K-L-L-M-I-I-S-Q-K-D-T-F-H-S</b> | ▶               |
| 25        | B 1                  | ATM           | S-S-L-E-L-S-S-ST-Q-P-E-S-S-S-S       | ▶               |
| 26        | B 2                  | ATR           | <b>L-V-Q-G-I-S-F-S-Q-P-T-C-P-D-H</b> | ▶               |
| 27        | B 3                  | AuroraAkinase | P-P-D-Q-R-R-L-S-E-T-S-V-N-T-E        | ▶               |
| 28        | B 4                  | AuroraAkinase | K-A-E-F-C-N-K-S-K-Q-P-G-L-A-R        | ▶               |
| 29        | B 5                  | AuroraAkinase | <b>R-E-E-V-P-R-R-S-G-L-S-A-G-H-R</b> | ▶               |
| 30        | B 6                  | AuroraAkinase | <b>D-R-N-T-F-R-H-S-V-V-V-P-Y-E-P</b> | ▶               |
| 31        | B 7                  | AuroraAkinase | K-R-S-S-R-R-D-ST-K-L-P-A-L-K-R       | ▶               |
| 32        | B 8                  | AuroraBkinase | A-P-S-L-R-R-K-T-M-C-G-T-L-D-Y        | ▶               |
| 33        | B 9                  | AuroraBkinase | K-N-K-I-A-K-E-T-N-N-K-K-K-E-F        | ▶               |
| 34        | B10                  | AuroraBkinase | I-T-S-A-A-R-R-S-Y-V-S-S-G-E-M        | ▶               |
| 35        | B11                  | AuroraBkinase | A-T-K-A-A-R-K-S-A-P-A-T-G-G-V        | ▶               |
| 36        | B12                  | AuroraBkinase | <b>K-P-R-Y-H-K-R-T-S-S-A-V-W-N-S</b> | ▶               |
| 37        | B13                  | AuroraBkinase | <b>S-Q-N-H-K-R-K-T-I-S-K-I-P-A-P</b> | ▶               |

|    |     |               |                                      |   |
|----|-----|---------------|--------------------------------------|---|
| 38 | B14 | AuroraBkinase | K-R-P-Q-S-A-T-S-N-V-F-A-M-F-D        | ▶ |
| 39 | B15 | AuroraBkinase | I-T-S-A-A-R-R-ST-S-A-G-E-G-P-P       | ▶ |
| 40 | B16 | BCKDK         | <b>T-Y-R-I-G-H-H-S-T-S-D-D-S-S-A</b> | ▶ |
| 41 | B17 | CaM-KI_group  | R-F-I-I-G-S-V-S-E-D-N-S-E-D-E        | ▶ |
| 42 | B18 | CaM-KI_group  | <b>G-G-V-K-K-R-K-S-S-S-S-V-H-L-M</b> | ▶ |
| 43 | B19 | CaM-KII_group | N-V-A-S-R-M-E-S-T-G-V-M-G-N-I        | ▶ |
| 44 | B20 | CaM-KII_group | E-Q-L-S-R-E-L-S-T-L-R-N-L-F-K        | ▶ |
| 45 | B21 | CaM-KII_group | D-M-K-V-R-K-S-S-T-Q-E-E-I-K-K        | ▶ |
| 46 | B22 | CaM-KII_group | I-T-G-K-N-R-P-S-S-G-S-L-I-Q-V        | ▶ |
| 47 | B23 | CaM-KII_group | I-T-L-E-R-G-N-S-G-L-G-F-S-I-A        | ▶ |
| 48 | B24 | CaM-KII_group | <b>V-T-G-P-R-L-V-S-N-H-S-L-H-E-T</b> | ▶ |
| 49 | C 1 | CaM-KII_group | <b>P-K-Y-S-R-Q-F-S-L-E-H-V-H-G-S</b> | ▶ |
| 50 | C 2 | CaM-KII_group | A-R-I-R-A-A-K-S-G-S-A-N-A-Y-M        | ▶ |
| 51 | C 3 | CaM-KII_group | K-L-K-E-R-W-G-S-N-E-L-P-A-E-E        | ▶ |
| 52 | C 4 | CaM-KII_group | R-R-K-R-R-V-V-T-K-A-Y-K-E-P-L        | ▶ |
| 53 | C 5 | CaM-KII_group | A-G-L-R-R-Q-V-ST-L-E-E-P-A-Q-A       | ▶ |
| 54 | C 6 | CaM-KIV       | P-Q-L-A-S-K-Q-S-M-V-N-S-L-P-T        | ▶ |
| 55 | C 7 | CaM-KIV       | R-P-L-G-R-T-Q-S-A-P-L-P-Q-N-A        | ▶ |
| 56 | C 8 | CaM-KIV       | K-L-S-S-P-A-L-S-A-S-A-S-D-G-T        | ▶ |
| 57 | C 9 | CaM-KIV       | R-P-L-S-R-A-Q-ST-A-P-A-S-A-G-T       | ▶ |
| 58 | C10 | CCDPK         | S-A-I-R-R-A-S-T-I-E-M-P-Q-Q-A        | ▶ |
| 59 | C11 | CCDPK         | Q-Q-L-A-R-E-T-S-V-D-P-D-M-R-K        | ▶ |
| 60 | C12 | CCDPK         | T-D-G-N-F-L-K-T-S-C-G-S-P-N-Y        | ▶ |
| 61 | C13 | CCDPK         | D-P-G-S-V-L-S-T-A-C-G-T-P-G-Y        | ▶ |
| 62 | C14 | CCDPK         | D-P-G-S-R-L-S-ST-A-C-G-T-P-G-Y       | ▶ |
| 63 | C15 | CDK           | <b>E-E-P-S-P-L-P-S-P-T-A-S-P-N-H</b> | ▶ |
| 64 | C16 | CDK           | E-P-G-V-E-R-S-S-P-S-K-C-P-S-L        | ▶ |
| 65 | C17 | CDK           | D-S-S-R-A-P-S-S-P-R-P-P-G-S-T        | ▶ |
| 66 | C18 | CDK           | R-P-N-P-C-A-Y-T-P-P-S-L-K-A-V        | ▶ |
| 67 | C19 | CDK           | T-P-A-P-R-Q-S-S-P-S-K-S-S-A-S        | ▶ |
| 68 | C20 | CDK           | F-P-P-L-N-S-V-S-P-S-P-L-M-L-L        | ▶ |
| 69 | C21 | CDK           | <b>S-G-H-F-T-M-R-S-P-F-K-C-D-A-C</b> | ▶ |
| 70 | C22 | CDK           | D-V-S-P-Y-S-L-S-P-V-S-N-K-S-Q        | ▶ |
| 71 | C23 | CDK           | S-G-D-S-D-A-S-S-P-R-S-N-C-S-D        | ▶ |
| 72 | C24 | CDK           | A-E-N-S-R-L-Q-T-P-G-G-G-S-K-T        | ▶ |
| 73 | D 1 | CDK           | L-P-E-N-N-V-L-S-P-L-P-S-Q-A-M        | ▶ |
| 74 | D 2 | CDK           | <b>G-T-N-R-C-F-G-S-F-R-H-S-P-Y-E</b> | ▶ |
| 75 | D 3 | CDK           | N-P-G-G-R-P-I-T-P-P-R-N-S-A-K        | ▶ |
| 76 | D 4 | CDK           | A-A-L-R-Q-L-R-S-P-R-R-A-Q-A-P        | ▶ |
| 77 | D 5 | CDK           | A-V-I-P-I-N-G-S-P-R-T-P-R-R-G        | ▶ |
| 78 | D 6 | CDK           | V-R-Y-I-K-E-N-S-P-C-V-T-P-V-S        | ▶ |
| 79 | D 7 | CDK           | N-S-S-D-T-V-T-S-P-Q-R-A-G-P-L        | ▶ |
| 80 | D 8 | CDK           | S-G-Y-S-S-P-G-S-P-G-T-P-G-S-R        | ▶ |
| 81 | D 9 | CDK           | S-S-P-S-T-P-S-ST-P-S-K-S-S-A-P       | ▶ |
| 82 | D10 | CDK1          | F-L-E-G-C-A-C-T-P-E-R-M-A-E-A        | ▶ |
| 83 | D11 | CDK1          | K-K-P-F-K-C-F-T-P-K-G-S-S-L-K        | ▶ |
| 84 | D12 | CDK1          | <b>T-E-Y-S-Q-G-A-S-P-Q-P-Q-H-Q-L</b> | ▶ |
| 85 | D13 | CDK1          | R-P-V-S-S-A-A-S-V-Y-A-G-A-G-G        | ▶ |

|     |     |       |                                      |   |
|-----|-----|-------|--------------------------------------|---|
| 86  | D14 | CDK1  | T-D-S-A-T-I-V-S-P-P-P-S-S-P-P        | ▶ |
| 87  | D15 | CDK1  | F-S-D-P-W-G-G-S-P-A-K-P-S-T-N        | ▶ |
| 88  | D16 | CDK1  | <b>M-D-C-L-T-F-G-S-P-V-L-M-R-H-L</b> | ▶ |
| 89  | D17 | CDK1  | R-E-Y-Q-Q-R-N-S-P-G-V-P-T-G-A        | ▶ |
| 90  | D18 | CDK1  | S-L-P-Q-A-T-V-T-P-P-R-K-E-E-R        | ▶ |
| 91  | D19 | CDK1  | T-K-N-G-L-P-G-S-R-P-G-S-P-E-R        | ▶ |
| 92  | D20 | CDK1  | K-E-P-S-E-V-P-T-P-K-R-P-R-G-R        | ▶ |
| 93  | D21 | CDK1  | Q-E-P-T-G-E-P-S-P-K-R-P-R-G-R        | ▶ |
| 94  | D22 | CDK1  | P-N-K-E-L-P-P-S-P-E-K-K-T-K-P        | ▶ |
| 95  | D23 | CDK1  | <b>T-Q-G-H-P-D-G-T-P-P-K-L-D-T-A</b> | ▶ |
| 96  | D24 | CDK1  | S-F-K-K-Q-E-K-T-P-K-T-P-K-G-P        | ▶ |
| 97  | E 1 | CDK1  | T-S-C-A-S-L-D-S-P-G-R-I-K-R-K        | ▶ |
| 98  | E 2 | CDK1  | G-R-Y-L-T-Q-E-T-N-K-V-E-T-Y-K        | ▶ |
| 99  | E 3 | CDK1  | G-G-L-I-E-P-D-T-P-G-R-V-P-L-D        | ▶ |
| 100 | E 4 | CDK1  | S-L-I-V-P-G-K-S-P-T-R-K-K-S-G        | ▶ |
| 101 | E 5 | CDK1  | K-E-L-Q-R-Q-A-S-P-S-I-V-I-A-L        | ▶ |
| 102 | E 6 | CDK1  | G-A-G-G-Y-T-Q-S-P-G-G-F-G-S-P        | ▶ |
| 103 | E 7 | CDK1  | D-P-Q-Q-L-Q-L-S-P-L-K-G-L-S-L        | ▶ |
| 104 | E 8 | CDK1  | R-G-A-L-V-R-G-T-P-V-R-G-A-I-T        | ▶ |
| 105 | E 9 | CDK1  | L-F-Q-L-G-P-P-S-P-V-K-M-P-S-P        | ▶ |
| 106 | E10 | CDK1  | L-D-E-P-N-P-N-S-P-A-N-S-Q-A-A        | ▶ |
| 107 | E11 | CDK1  | T-E-P-S-L-P-G-ST-P-V-R-P-S-S-A       | ▶ |
| 108 | E12 | CDK11 | P-A-A-A-P-A-S-S-S-D-P-A-A-A-A        | ▶ |
| 109 | E13 | CDK2  | A-D-L-G-E-V-R-T-P-E-P-P-E-S-L        | ▶ |
| 110 | E14 | CDK2  | N-S-L-T-P-K-S-T-P-V-K-T-L-P-F        | ▶ |
| 111 | E15 | CDK2  | I-N-K-K-Q-A-T-S-P-A-S-K-K-P-A        | ▶ |
| 112 | E16 | CDK2  | R-V-K-A-L-P-L-S-P-R-K-R-L-G-D        | ▶ |
| 113 | E17 | CDK2  | N-E-E-A-K-R-K-S-P-K-K-K-E-K-C        | ▶ |
| 114 | E18 | CDK2  | R-N-K-L-K-P-K-ST-P-S-K-K-L-K-A       | ▶ |
| 115 | E19 | CDK4  | K-R-S-F-A-P-S-T-P-L-T-G-R-R-Y        | ▶ |
| 116 | E20 | CDK4  | E-R-G-K-L-P-E-S-P-K-R-A-E-E-I        | ▶ |
| 117 | E21 | CDK4  | S-K-A-L-R-I-S-T-P-L-T-G-V-R-Y        | ▶ |
| 118 | E22 | CDK4  | S-M-D-A-R-P-S-ST-P-L-A-G-V-R-Y       | ▶ |
| 119 | E23 | CDK5  | S-I-K-S-E-P-I-S-P-P-R-D-R-M-T        | ▶ |
| 120 | E24 | CDK5  | T-R-K-S-A-P-S-S-P-T-L-D-C-E-K        | ▶ |
| 121 | F 1 | CDK5  | G-F-K-S-S-P-A-ST-P-K-A-D-G-A-A       | ▶ |
| 122 | F 2 | CDK7  | <b>G-L-A-K-S-F-G-S-P-N-R-A-Y-T-H</b> | ▶ |
| 123 | F 3 | CDK7  | <b>P-E-E-F-I-S-L-S-P-P-H-E-A-L-D</b> | ▶ |
| 124 | F 4 | CDK7  | R-R-R-K-K-R-T-S-I-E-T-N-I-R-V        | ▶ |
| 125 | F 5 | CDK7  | E-I-V-P-S-P-P-S-P-P-P-L-P-R-I        | ▶ |
| 126 | F 6 | CDK7  | <b>G-I-P-I-R-V-Y-T-H-E-V-V-T-L-W</b> | ▶ |
| 127 | F 7 | CDK7  | Y-S-Y-Q-M-A-L-T-P-V-V-V-T-L-W        | ▶ |
| 128 | F 8 | CDK7  | G-S-P-K-R-A-L-ST-P-E-V-V-T-L-W       | ▶ |
| 129 | F 9 | CDPK  | S-E-T-T-K-S-A-S-F-L-K-G-R-A-A        | ▶ |
| 130 | F10 | CHK1  | <b>E-V-V-G-G-T-D-S-S-M-D-V-F-H-L</b> | ▶ |
| 131 | F11 | CHK1  | <b>P-A-L-K-R-S-H-S-D-S-L-D-H-D-I</b> | ▶ |
| 132 | F12 | CHK1  | D-E-L-G-R-L-C-ST-G-A-F-V-E-S-L       | ▶ |
| 133 | F13 | CHK2  | P-L-L-S-R-M-G-S-L-R-A-P-V-D-E        | ▶ |

|     |     |            |                                       |   |
|-----|-----|------------|---------------------------------------|---|
| 134 | F14 | CHK2       | P-P-L-F-P-I-K-S-F-V-K-T-K-C-K         | ▶ |
| 135 | F15 | CHK2       | S-G-L-Y-R-S-P-S-M-P-E-N-L-N-R         | ▶ |
| 136 | F16 | CHK2       | L-F-T-Q-R-Q-N-S-A-P-A-R-M-L-S         | ▶ |
| 137 | F17 | CHK2       | G-L-T-K-R-Q-K-ST-M-S-A-T-M-P-E        | ▶ |
| 138 | F18 | CK         | P-P-A-P-G-N-A-S-E-S-E-E-D-R-S         | ▶ |
| 139 | F19 | CK         | <b>A-V-H-Y-L-D-E-T-E-Q-W-E-K-F-G</b>  | ▶ |
| 140 | F20 | CK         | E-D-P-D-I-P-E-S-Q-M-E-E-P-A-A         | ▶ |
| 141 | F21 | CK         | <b>A-D-D-Y-H-P-E-ST-E-M-E-E-H-A-A</b> | ▶ |
| 142 | F22 | CK1delta   | <b>N-R-M-G-Q-A-G-S-T-I-S-N-S-H-A</b>  | ▶ |
| 143 | F23 | CK1delta   | <b>A-G-S-T-I-S-N-S-H-A-Q-P-F-D-F</b>  | ▶ |
| 144 | F24 | CK1epsilon | A-L-P-G-K-A-E-S-V-A-S-L-T-S-Q         | ▶ |
| 145 | G 1 | CK1_group  | S-R-C-S-S-L-S-S-L-S-S-A-E-D-E         | ▶ |
| 146 | G 2 | CK1_group  | G-A-T-T-T-A-P-S-L-S-G-K-G-N-P         | ▶ |
| 147 | G 3 | CK1_group  | R-M-G-Q-L-R-G-S-A-T-R-A-L-P-P         | ▶ |
| 148 | G 4 | CK1_group  | G-I-P-V-R-C-Y-S-A-E-V-V-T-L-W         | ▶ |
| 149 | G 5 | CK1_group  | G-D-D-D-D-A-Y-S-D-T-E-T-T-E-A         | ▶ |
| 150 | G 6 | CK1_group  | N-E-A-A-A-R-F-T-L-G-S-P-L-T-S         | ▶ |
| 151 | G 7 | CK1_group  | E-P-P-L-S-Q-E-T-F-S-D-L-W-K-L         | ▶ |
| 152 | G 8 | CK1_group  | S-T-L-S-S-S-S-ST-L-E-S-S-P-S-G        | ▶ |
| 153 | G 9 | CK2        | <b>H-K-A-E-L-Q-G-S-D-E-D-E-H-V-R</b>  | ▶ |
| 154 | G10 | CK2        | F-D-G-I-W-K-A-S-F-T-T-F-T-V-T         | ▶ |
| 155 | G11 | CK2        | <b>D-Y-F-L-L-S-H-S-L-L-P-A-L-C-D</b>  | ▶ |
| 156 | G12 | CK2        | K-E-R-D-K-E-V-S-D-D-E-A-E-E-K         | ▶ |
| 157 | G13 | CK2        | K-E-R-E-K-E-I-S-D-D-E-A-E-E-E         | ▶ |
| 158 | G14 | CK2        | T-S-G-E-D-T-L-S-D-S-D-D-E-D-D         | ▶ |
| 159 | G15 | CK2        | G-G-R-E-R-L-A-S-T-N-D-K-G-S-M         | ▶ |
| 160 | G16 | CK2        | <b>G-P-R-V-W-Y-V-S-N-I-D-G-T-H-I</b>  | ▶ |
| 161 | G17 | CK2        | <b>G-Y-L-R-K-P-K-S-M-H-K-R-F-F-V</b>  | ▶ |
| 162 | G18 | CK2        | <b>S-K-E-S-E-H-D-S-D-E-S-S-D-D-D</b>  | ▶ |
| 163 | G19 | CK2        | L-V-R-S-R-E-V-S-V-D-E-G-R-A-C         | ▶ |
| 164 | G20 | CK2        | K-R-G-W-I-P-A-S-F-L-E-P-L-D-S         | ▶ |
| 165 | G21 | CK2        | V-D-G-S-G-D-T-S-S-N-E-E-I-G-S         | ▶ |
| 166 | G22 | CK2        | V-D-G-T-G-D-T-S-S-E-E-D-E-D-E         | ▶ |
| 167 | G23 | CK2        | Y-G-G-F-T-E-E-S-G-D-D-E-Y-Q-G         | ▶ |
| 168 | G24 | CK2        | <b>R-I-C-M-R-N-F-S-R-S-D-H-L-T-T</b>  | ▶ |
| 169 | H 1 | CK2        | I-Y-P-W-M-R-S-S-G-T-D-R-K-R-G         | ▶ |
| 170 | H 2 | CK2        | E-F-D-T-N-Y-A-T-D-D-D-I-V-F-E         | ▶ |
| 171 | H 3 | CK2        | A-S-S-S-T-S-V-T-P-D-V-S-D-N-E         | ▶ |
| 172 | H 4 | CK2        | K-A-A-R-V-L-G-S-E-G-E-E-E-D-E         | ▶ |
| 173 | H 5 | CK2        | <b>G-K-K-T-K-F-A-S-D-D-E-H-D-E-H</b>  | ▶ |
| 174 | H 6 | CK2        | R-A-A-M-F-P-E-T-L-D-E-G-M-Q-I         | ▶ |
| 175 | H 7 | CK2        | A-E-K-Y-A-K-E-S-L-K-E-E-D-E-S         | ▶ |
| 176 | H 8 | CK2        | E-E-E-E-E-E-S-ST-D-D-E-E-E-E-E        | ▶ |
| 177 | H 9 | CK2alpha   | D-K-E-N-G-S-V-S-T-S-E-T-P-P-P         | ▶ |
| 178 | H10 | CSFR1      | I-E-S-Y-E-G-N-S-Y-T-F-I-D-P-T         | ▶ |
| 179 | H11 | DAPK_group | R-R-E-E-R-S-L-S-A-P-G-N-L-L-T         | ▶ |
| 180 | H12 | DAPK_group | A-R-K-K-W-K-Q-S-V-R-L-I-S-L-C         | ▶ |
| 181 | H13 | DAPK_group | I-I-M-D-S-S-I-S-K-Q-A-L-S-E-I         | ▶ |

|     |     |             |                                      |   |
|-----|-----|-------------|--------------------------------------|---|
| 182 | H14 | DAPK3       | K-Q-T-A-R-K-S-T-G-G-K-A-P-R-K        | ▶ |
| 183 | H15 | DAPK3       | K-K-R-P-Q-R-A-T-S-N-V-F-A-M-F        | ▶ |
| 184 | H16 | DAPK3       | R-L-G-K-R-V-L-S-K-L-Q-S-P-S-R        | ▶ |
| 185 | H17 | DAPK3       | S-S-R-R-R-A-I-S-E-T-E-E-N-S-D        | ▶ |
| 186 | H18 | DAPK3       | <b>Q-G-R-K-R-R-Q-T-S-M-T-D-F-Y-H</b> | ▶ |
| 187 | H19 | DAPK3       | A-G-R-K-R-R-S-ST-S-G-V-E-F-S-D       | ▶ |
| 188 | H20 | DNA-PK      | <b>E-K-E-E-D-H-I-S-I-S-S-L-A-E-G</b> | ▶ |
| 189 | H21 | DNA-PK      | L-S-P-I-D-M-E-S-Q-E-R-I-K-A-E        | ▶ |
| 190 | H22 | DNA-PK      | L-T-P-M-F-V-E-T-Q-A-S-Q-G-T-L        | ▶ |
| 191 | H23 | DNA-PK      | <b>E-K-K-T-K-I-R-S-L-H-N-K-L-L-N</b> | ▶ |
| 192 | H24 | DNA-PK      | Q-Q-A-T-T-G-V-S-Q-E-T-S-E-N-P        | ▶ |
| 193 | I 1 | DNA-PK      | L-T-V-L-N-A-F-S-Q-A-P-S-T-M-Q        | ▶ |
| 194 | I 2 | DNA-PK      | L-S-E-T-D-I-S-ST-Q-E-E-S-S-A-G       | ▶ |
| 195 | I 3 | Eg3kinase   | V-Q-N-K-R-R-R-S-V-T-P-P-E-E-Q        | ▶ |
| 196 | I 4 | ERA         | L-G-Q-K-I-S-I-T-S-R-K-A-Q-T-T        | ▶ |
| 197 | I 5 | ERTPK       | R-E-L-V-E-P-L-T-P-S-G-E-A-P-N        | ▶ |
| 198 | I 6 | ERTPK       | P-G-E-T-P-P-L-S-P-I-D-M-E-S-Q        | ▶ |
| 199 | I 7 | ERTPK       | L-L-P-T-P-P-L-S-P-S-R-R-S-G-L        | ▶ |
| 200 | I 8 | ERTPK       | L-L-P-T-P-P-L-ST-P-S-R-R-S-G-L       | ▶ |
| 201 | I 9 | GRK_group   | K-A-Y-G-N-G-Y-S-S-N-G-N-T-G-E        | ▶ |
| 202 | I10 | GRK_group   | Q-E-A-P-E-R-A-S-S-V-Y-T-R-S-T        | ▶ |
| 203 | I11 | GRK_group   | R-S-Q-E-L-R-K-T-F-K-E-I-I-C-C        | ▶ |
| 204 | I12 | GRK_group   | V-A-N-Q-D-P-V-S-P-S-L-V-Q-G-R        | ▶ |
| 205 | I13 | GRK_group   | E-S-G-E-D-E-S-ST-S-S-D-S-S-G-E       | ▶ |
| 206 | I14 | GRK-1       | P-L-G-D-D-E-A-S-A-T-V-S-K-T-E        | ▶ |
| 207 | I15 | GRK-1       | A-V-S-K-A-E-T-ST-Q-T-A-P-A-A-E       | ▶ |
| 208 | I16 | GRK-2       | K-D-E-K-K-E-E-S-E-E-S-D-D-D-M        | ▶ |
| 209 | I17 | GRK-2       | <b>L-C-E-D-L-P-G-T-E-D-F-V-G-H-Q</b> | ▶ |
| 210 | I18 | GRK-2       | A-T-A-R-E-R-V-T-A-C-T-P-S-D-G        | ▶ |
| 211 | I19 | GRK-2       | E-R-A-L-T-E-D-S-T-Q-T-S-D-T-A        | ▶ |
| 212 | I20 | GRK-2       | P-G-M-E-G-L-G-T-D-I-T-V-I-C-P        | ▶ |
| 213 | I21 | GRK-2       | Y-E-D-D-E-E-E-S-E-A-Q-G-P-K          | ▶ |
| 214 | I22 | GRK-2       | G-M-D-E-M-E-F-T-E-A-E-S-N-M-N        | ▶ |
| 215 | I23 | GRK-2       | R-E-D-D-T-E-D-ST-E-D-T-S-G-S-G       | ▶ |
| 216 | I24 | GRK-3       | V-K-A-L-D-F-R-T-P-R-N-A-K-I-V        | ▶ |
| 217 | J 1 | GRK-4       | E-S-M-R-R-S-V-S-E-A-A-L-A-Q-P        | ▶ |
| 218 | J 2 | GRK-5       | V-L-D-I-E-Q-F-S-T-V-K-G-V-N-L        | ▶ |
| 219 | J 3 | GRK-5       | <b>D-F-V-G-H-Q-G-T-V-P-S-D-N-I-D</b> | ▶ |
| 220 | J 4 | GRK-6       | V-A-K-L-L-E-G-T-G-S-E-A-S-S-T        | ▶ |
| 221 | J 5 | GRK-6       | P-A-L-V-R-S-A-S-S-D-T-S-E-E-L        | ▶ |
| 222 | J 6 | GSK-3_group | <b>H-L-Q-P-G-H-P-T-P-P-P-T-P-V-P</b> | ▶ |
| 223 | J 7 | GSK-3_group | E-S-E-Q-S-M-D-S-E-E-P-D-S-R-G        | ▶ |
| 224 | J 8 | GSK-3_group | R-V-K-E-E-P-P-S-P-P-Q-S-P-R-V        | ▶ |
| 225 | J 9 | GSK-3_group | <b>Q-Q-Q-S-Y-L-D-S-G-I-H-S-G-A-T</b> | ▶ |
| 226 | J10 | GSK-3_group | N-A-S-G-S-T-S-T-P-A-P-S-R-T-A        | ▶ |
| 227 | J11 | GSK-3_group | Q-K-R-R-E-I-L-S-R-R-P-S-Y-R-K        | ▶ |
| 228 | J12 | GSK-3_group | E-E-V-D-L-A-C-T-P-T-D-V-R-D-V        | ▶ |
| 229 | J13 | GSK-3_group | E-E-E-E-E-A-P-ST-P-P-P-S-P-P-G       | ▶ |

|     |     |             |                                       |   |
|-----|-----|-------------|---------------------------------------|---|
| 230 | J14 | GSK-3beta   | P-P-S-S-T-D-R-S-P-Y-E-K-V-S-A         | ▶ |
| 231 | J15 | GSK-3beta   | Y-R-Y-P-R-P-A-S-V-P-P-S-P-S-L         | ▶ |
| 232 | J16 | GSK-3beta   | <b>V-E-V-D-A-A-V-T-P-E-E-R-H-L-S</b>  | ▶ |
| 233 | J17 | GSK-3beta   | P-D-L-K-N-V-K-S-K-I-G-S-T-E-N         | ▶ |
| 234 | J18 | GSK-3beta   | <b>D-E-G-H-S-N-S-S-P-R-H-S-E-A-A</b>  | ▶ |
| 235 | J19 | GSK-3beta   | <b>Q-A-R-A-H-G-L-S-L-I-P-S-T-G-L</b>  | ▶ |
| 236 | J20 | GSK-3beta   | <b>M-K-I-D-E-P-S-T-P-Y-H-S-M-M-G</b>  | ▶ |
| 237 | J21 | GSK-3beta   | L-L-D-E-Y-N-V-T-P-S-P-P-G-T-V         | ▶ |
| 238 | J22 | GSK-3beta   | <b>H-V-Q-R-V-M-R-T-P-G-C-Q-S-P-G</b>  | ▶ |
| 239 | J23 | GSK-3beta   | <b>V-P-P-S-V-P-L-ST-P-E-P-S-P-H-S</b> | ▶ |
| 240 | J24 | HRI         | I-E-G-M-I-L-L-S-E-L-S-R-R-R-I         | ▶ |
| 241 | K 1 | IKK_group   | A-K-E-L-D-Q-G-S-L-C-T-S-F-V-G         | ▶ |
| 242 | K 2 | IKK_group   | S-D-E-F-R-P-R-S-K-S-Q-S-S-S-N         | ▶ |
| 243 | K 3 | IKK_group   | T-E-S-I-T-A-T-S-P-A-S-M-V-G-G         | ▶ |
| 244 | K 4 | IKK_group   | L-F-E-F-R-P-R-S-K-S-Q-S-S-G-S         | ▶ |
| 245 | K 5 | IKK_group   | A-R-V-G-G-A-S-S-L-E-N-T-V-D-L         | ▶ |
| 246 | K 6 | IKK_group   | <b>L-P-A-P-A-H-H-S-F-H-L-A-L-S-N</b>  | ▶ |
| 247 | K 7 | IKK_group   | D-E-L-R-D-S-D-S-V-C-D-S-G-V-E         | ▶ |
| 248 | K 8 | IKK_group   | R-P-R-S-R-S-G-ST-P-S-S-S-S-S-S        | ▶ |
| 249 | K 9 | IKK-beta    | S-G-D-E-D-F-S-S-I-A-D-M-D-F-S         | ▶ |
| 250 | K10 | IKK-beta    | Q-D-V-L-G-E-E-S-P-L-G-K-P-A-M         | ▶ |
| 251 | K11 | IKK-beta    | P-G-D-E-D-F-S-ST-I-A-D-A-D-F-S        | ▶ |
| 252 | K12 | ILK         | <b>Q-K-R-H-A-R-V-T-V-K-Y-D-R-R-E</b>  | ▶ |
| 253 | K13 | ILK         | V-R-R-Q-G-K-V-T-V-K-Y-D-R-K-E         | ▶ |
| 254 | K14 | ILK         | S-M-A-D-V-K-F-S-F-Q-C-P-G-R-M         | ▶ |
| 255 | K15 | ILK         | <b>R-H-Q-Q-G-K-V-T-V-K-Y-D-R-K-E</b>  | ▶ |
| 256 | K16 | ILK         | <b>R-P-H-F-P-Q-F-S-Y-S-A-S-S-T-A</b>  | ▶ |
| 257 | K17 | ILK         | <b>R-K-Q-H-A-R-V-ST-V-K-Y-D-R-R-E</b> | ▶ |
| 258 | K18 | IPL1        | S-N-N-Q-R-R-K-T-I-F-V-E-D-F-P         | ▶ |
| 259 | K19 | IPL1        | <b>V-N-L-Q-K-I-D-S-N-L-S-F-C-F-H</b>  | ▶ |
| 260 | K20 | IPL1        | L-R-L-K-K-N-I-S-M-D-D-D-D-A-L         | ▶ |
| 261 | K21 | IPL1        | <b>K-D-I-R-L-K-E-S-L-A-P-F-D-N-H</b>  | ▶ |
| 262 | K22 | IPL1        | R-N-S-V-S-R-L-S-I-N-Q-L-G-S-L         | ▶ |
| 263 | K23 | IPL1        | S-A-T-E-Y-R-L-S-I-G-S-A-P-T-S         | ▶ |
| 264 | K24 | IPL1        | <b>N-S-I-N-R-R-K-ST-I-L-S-F-A-T-H</b> | ▶ |
| 265 | L 1 | JNK_group   | F-S-F-D-T-D-R-S-P-A-P-M-S-C-D         | ▶ |
| 266 | L 2 | JNK_group   | D-T-E-G-R-P-P-S-P-P-P-T-S-T-P         | ▶ |
| 267 | L 3 | JNK_group   | <b>I-H-F-W-S-S-L-S-P-V-A-P-L-S-P</b>  | ▶ |
| 268 | L 4 | JNK_group   | G-L-G-G-G-A-A-S-P-P-A-A-S-P-F         | ▶ |
| 269 | L 5 | JNK_group   | D-L-F-A-S-S-S-ST-P-P-A-A-S-P-P        | ▶ |
| 270 | L 6 | KIS         | V-R-V-S-N-G-S-P-S-L-E-R-M-D-A         | ▶ |
| 271 | L 7 | KIS         | <b>G-S-H-G-Q-T-P-S-P-G-A-L-P-L-G</b>  | ▶ |
| 272 | L 8 | KIS         | G-R-D-S-R-S-G-S-P-M-A-R-R             | ▶ |
| 273 | L 9 | MAP2K_group | S-R-G-G-A-R-A-S-P-A-T-Q-P-P-P         | ▶ |
| 274 | L10 | MAP2K_group | P-S-D-L-L-P-M-S-P-S-V-Y-A-V-L         | ▶ |
| 275 | L11 | MAP2K_group | A-N-L-D-S-A-Q-S-P-G-P-S-W-P-A         | ▶ |
| 276 | L12 | MAP2K_group | <b>H-D-H-T-G-F-L-T-E-Y-V-A-T-R-W</b>  | ▶ |
| 277 | L13 | MAP2K_group | A-G-T-S-F-M-M-T-P-Y-V-V-T-R-Y         | ▶ |



|     |     |             |                                       |   |
|-----|-----|-------------|---------------------------------------|---|
| 278 | L14 | MAP2K_group | S-S-M-S-T-E-Q-T-L-A-S-D-T-D-S         | ▶ |
| 279 | L15 | MAP2K_group | D-G-S-A-V-N-G-T-S-S-A-E-T-N-L         | ▶ |
| 280 | L16 | MAP2K_group | <b>E-P-I-C-S-V-N-T-P-R-E-V-T-L-H</b>  | ▶ |
| 281 | L17 | MAP2K_group | E-Y-P-E-P-Y-A-S-P-P-Q-P-G-L-P         | ▶ |
| 282 | L18 | MAP2K_group | V-S-G-Q-L-I-D-S-M-A-N-S-F-V-G         | ▶ |
| 283 | L19 | MAP2K_group | S-S-G-Q-L-P-A-ST-P-A-V-S-T-L-A        | ▶ |
| 284 | L20 | MAP2K1      | P-E-V-L-R-P-E-T-P-R-P-V-D-I-G         | ▶ |
| 285 | L21 | MAP2K1      | P-F-R-D-S-P-L-S-S-R-L-L-D-D-G         | ▶ |
| 286 | L22 | MAP2K1      | I-L-P-F-T-P-P-V-V-K-R-L-L-G-W         | ▶ |
| 287 | L23 | MAP2K1      | D-F-P-K-K-P-L-T-P-Y-F-R-F-F-M         | ▶ |
| 288 | L24 | MAP2K1      | D-G-R-M-V-Q-L-S-P-P-A-L-A-A-P         | ▶ |
| 289 | M 1 | MAP2K1      | V-A-P-P-V-P-A-T-P-Y-E-A-F-D-P         | ▶ |
| 290 | M 2 | MAP2K1      | <b>K-K-K-S-E-P-S-S-P-D-H-G-S-S-T</b>  | ▶ |
| 291 | M 3 | MAP2K1      | D-T-P-A-A-P-K-ST-P-P-P-L-D-G-V        | ▶ |
| 292 | M 4 | MAP2K2      | <b>G-S-R-T-A-P-Y-T-P-N-L-P-H-H-Q</b>  | ▶ |
| 293 | M 5 | MAP2K2      | S-A-L-S-Y-L-Q-S-P-I-T-T-S-P-S         | ▶ |
| 294 | M 6 | MAP2K2      | T-E-L-E-P-L-C-T-P-V-V-T-C-T-P         | ▶ |
| 295 | M 7 | MAP2K3      | R-Q-A-D-S-E-M-T-G-Y-V-V-T-R-W         | ▶ |
| 296 | M 8 | MAP2K4      | I-S-G-Q-L-V-D-S-I-A-K-T-R-D-A         | ▶ |
| 297 | M 9 | MAP2K4      | L-V-D-S-I-A-K-T-R-D-A-G-C-R-P         | ▶ |
| 298 | M10 | MAP2K6      | K-R-K-S-L-V-G-T-P-Y-W-M-A-P-E         | ▶ |
| 299 | M11 | MAP3K1      | N-C-E-L-P-L-L-T-P-C-S-K-A-V-M         | ▶ |
| 300 | M12 | MAP3K7      | G-S-P-S-I-R-C-S-S-V-S                 | ▶ |
| 301 | M13 | MAP3K7      | <b>C-D-I-Q-T-H-M-T-N-N-K-G-S-A-A</b>  | ▶ |
| 302 | M14 | MAP3K7      | <b>S-D-I-I-I-H-G-ST-A-A-K-G-A-A-A</b> | ▶ |
| 303 | M15 | MAP3K8      | <b>T-G-D-Y-I-P-G-T-E-T-H-M-A-P-E</b>  | ▶ |
| 304 | M16 | MAP4K4      | S-T-E-V-K-E-D-S-A-Y-G-S-Q-S-V         | ▶ |
| 305 | M17 | MAPK_group  | S-R-D-P-V-A-R-T-S-P-L-Q-T-P-A         | ▶ |
| 306 | M18 | MAPK_group  | K-M-K-N-K-P-R-S-P-V-V-E-L-S-K         | ▶ |
| 307 | M19 | MAPK_group  | S-S-S-S-P-P-G-T-P-S-P-A-D-A-K         | ▶ |
| 308 | M20 | MAPK_group  | <b>R-R-L-K-G-P-G-T-P-A-F-P-H-Y-L</b>  | ▶ |
| 309 | M21 | MAPK_group  | C-A-D-V-P-L-L-T-P-S-S-K-E-M-M         | ▶ |
| 310 | M22 | MAPK_group  | K-I-K-Q-E-V-E-S-P-T-D-K-S-G-N         | ▶ |
| 311 | M23 | MAPK_group  | S-A-Y-G-G-L-T-S-P-G-L-S-Y-S-L         | ▶ |
| 312 | M24 | MAPK_group  | <b>L-H-P-P-P-Q-L-S-P-F-L-Q-P-H-G</b>  | ▶ |
| 313 | N 1 | MAPK_group  | I-D-E-N-C-L-L-S-P-L-A-G-E-D-D         | ▶ |
| 314 | N 2 | MAPK_group  | W-N-L-V-S-P-D-S-P-R-S-I-D-S-N         | ▶ |
| 315 | N 3 | MAPK_group  | <b>A-P-P-P-Q-P-P-T-P-A-L-P-H-P-P</b>  | ▶ |
| 316 | N 4 | MAPK_group  | <b>Y-S-H-K-G-H-L-S-E-G-L-V-T-K-W</b>  | ▶ |
| 317 | N 5 | MAPK_group  | L-S-L-P-S-T-Q-S-L-N-I-K-S-E-P         | ▶ |
| 318 | N 6 | MAPK_group  | N-F-D-F-V-T-E-T-P-L-E-G-D-F-A         | ▶ |
| 319 | N 7 | MAPK_group  | D-D-I-E-Q-W-F-T-E-D-P-G-P-D-E         | ▶ |
| 320 | N 8 | MAPK_group  | E-S-P-L-C-P-L-S-P-L-E-A-G-D-L         | ▶ |
| 321 | N 9 | MAPK_group  | <b>H-S-M-S-V-P-T-T-P-T-L-G-F-S-T</b>  | ▶ |
| 322 | N10 | MAPK_group  | D-T-E-F-T-S-R-T-P-K-D-S-P-G-I         | ▶ |
| 323 | N11 | MAPK_group  | E-L-I-L-K-P-P-S-P-I-S-E-A-P-R         | ▶ |
| 324 | N12 | MAPK_group  | N-F-S-S-S-P-S-T-P-V-G-S-P-Q-G         | ▶ |
| 325 | N13 | MAPK_group  | S-S-P-P-P-P-L-ST-P-L-L-P-P-S-A        | ▶ |

|     |     |            |                                      |   |
|-----|-----|------------|--------------------------------------|---|
| 326 | N14 | MAPK1      | G-P-L-A-P-P-A-S-P-G-P-F-A-T-R        | ▶ |
| 327 | N15 | MAPK1      | D-G-P-Q-L-P-A-S-P-N-P-T-T-T-A        | ▶ |
| 328 | N16 | MAPK1      | G-G-L-P-E-V-A-T-P-E-S-E-E-A-F        | ▶ |
| 329 | N17 | MAPK1      | Y-P-S-M-P-A-F-S-P-G-P-G-I-K-E        | ▶ |
| 330 | N18 | MAPK1      | A-I-K-V-E-P-A-S-P-P-Y-Y-S-E-K        | ▶ |
| 331 | N19 | MAPK1      | G-A-P-T-E-P-A-ST-P-P-P-Y-K-G-S       | ▶ |
| 332 | N20 | MAPK10     | <b>G-D-R-C-P-H-G-S-P-Q-G-P-L-A-P</b> | ▶ |
| 333 | N21 | MAPK10     | P-G-P-F-A-T-R-S-P-L-F-I-F-V-R        | ▶ |
| 334 | N22 | MAPK10     | D-K-S-T-Q-T-P-S-P-P-C-Q-A-F-N        | ▶ |
| 335 | N23 | MAPK10     | D-S-A-I-D-T-W-S-P-S-E-W-Q-M-A        | ▶ |
| 336 | N24 | MAPK10     | G-D-L-A-P-T-A-ST-P-G-F-F-A-A-R       | ▶ |
| 337 | O 1 | MAPK11     | G-F-S-K-N-C-G-S-P-G-S-S-Q-L-S        | ▶ |
| 338 | O 2 | MAPK12     | G-W-D-S-P-P-A-S-P-L-Q-R-Q-P-S        | ▶ |
| 339 | O 3 | MAPK12     | P-L-Q-R-Q-P-S-S-P-G-P-T-P-R-N        | ▶ |
| 340 | O 4 | MAPK12     | G-L-D-R-P-P-S-ST-P-G-P-R-P-P-N       | ▶ |
| 341 | O 5 | MAPK13     | G-T-E-E-K-C-G-S-P-R-V-R-T-L-S        | ▶ |
| 342 | O 6 | MAPK14     | <b>I-H-F-W-S-T-L-S-P-I-A-P-R-S-P</b> | ▶ |
| 343 | O 7 | MAPK14     | Q-A-T-Q-P-L-A-T-P-V-V-S-V-T-T        | ▶ |
| 344 | O 8 | MAPK14     | M-P-W-P-E-P-Q-S-P-R-V-L-P-N-G        | ▶ |
| 345 | O 9 | MAPK14     | E-E-K-E-R-T-F-S-F-C-G-T-I-E-Y        | ▶ |
| 346 | O10 | MAPK14     | K-E-D-L-P-V-I-T-I-D-P-A-S-P-Q        | ▶ |
| 347 | O11 | MAPK14     | <b>Q-M-V-N-G-A-H-S-A-S-T-L-D-E-A</b> | ▶ |
| 348 | O12 | MAPK14     | T-P-T-E-P-P-A-ST-P-V-L-P-P-Q-G       | ▶ |
| 349 | O13 | MAPK4      | L-V-T-K-W-Y-R-S-P-R-L-L-L-S-P        | ▶ |
| 350 | O14 | MAPK6      | M-T-I-L-Q-A-P-T-P-A-P-S-T-I-P        | ▶ |
| 351 | O15 | MAPK7      | S-A-L-Q-G-F-N-S-P-G-M-L-S-L-G        | ▶ |
| 352 | O16 | MAPK7      | A-N-P-S-P-P-P-S-P-S-Q-Q-I-N-L        | ▶ |
| 353 | O17 | MAPK8      | Q-T-E-P-Q-D-R-S-P-A-P-M-S-C-D        | ▶ |
| 354 | O18 | MAPKAPK2   | S-R-S-L-Y-A-S-S-P-G-G-V-Y-A-T        | ▶ |
| 355 | O19 | MAPKAPK2   | K-G-F-R-R-A-V-S-E-L-D-A-K-Q-A        | ▶ |
| 356 | O20 | MAPKAPK2   | F-S-L-L-R-G-P-S-W-D-P-F-R-D-W        | ▶ |
| 357 | O21 | MAPKAPK2   | T-A-L-Y-K-S-L-S-V-P-A-A-S-T-A        | ▶ |
| 358 | O22 | MAPKAPK2   | K-L-I-D-R-T-E-S-L-N-R-S-I-E-K        | ▶ |
| 359 | O23 | MAPKAPK2   | R-L-T-G-R-S-T-S-L-V-E-G-R-S-C        | ▶ |
| 360 | O24 | MAPKAPK2   | C-S-L-E-R-Q-L-S-L-E-Q-E-V-Q-Q        | ▶ |
| 361 | P 1 | MAPKAPK2   | T-T-S-T-R-T-Y-S-L-G-S-A-L-R-P        | ▶ |
| 362 | P 2 | MAPKAPK2   | G-Q-G-A-P-G-P-S-L-T-G-S-P-W-P        | ▶ |
| 363 | P 3 | MAPKAPK2   | P-R-L-L-R-S-L-ST-L-G-G-S-S-A-P       | ▶ |
| 364 | P 4 | MARK_group | <b>N-V-R-S-K-V-G-S-T-E-N-I-K-H-Q</b> | ▶ |
| 365 | P 5 | MARK_group | <b>K-A-Q-A-K-V-G-S-L-D-N-V-G-H-L</b> | ▶ |
| 366 | P 6 | MFPK       | S-T-S-T-P-A-P-S-R-T-A-S-F-S-E        | ▶ |
| 367 | P 7 | MHCK       | E-Q-G-R-G-R-S-S-V-Y-S-C-P-Q-D        | ▶ |
| 368 | P 8 | MHCK       | G-A-G-A-K-K-M-S-T-Y-N-V-P-Q-N        | ▶ |
| 369 | P 9 | MHCK       | K-A-G-D-E-K-A-ST-K-Y-K-E-P-Q-D       | ▶ |
| 370 | P10 | MLCK       | Y-I-V-E-R-Q-K-T-Q-T-K-L-V-N          | ▶ |
| 371 | P11 | MLCK       | R-R-A-A-E-G-S-S-N-V-F-S-M-F-D        | ▶ |
| 372 | P12 | MLCK       | K-R-P-Q-R-A-T-ST-N-V-F-A-M-F-D       | ▶ |
| 373 | P13 | MST1       | D-T-M-A-K-R-N-T-V-I-G-T-P-F-W        | ▶ |

|     |     |              |                                      |   |
|-----|-----|--------------|--------------------------------------|---|
| 374 | P14 | NEK          | E-E-G-T-F-R-S-S-I-R-R-L-S-T-R        | ▶ |
| 375 | P15 | NEK2         | L-G-Y-P-F-A-L-S-K-S-S-M-Y-T-V        | ▶ |
| 376 | P16 | NEK2         | E-K-K-K-P-N-A-T-R-P-V-T-P-P-R        | ▶ |
| 377 | P17 | NEK6         | <b>P-P-F-N-P-N-V-S-G-P-N-E-L-R-H</b> | ▶ |
| 378 | P18 | NEK6         | <b>E-G-G-Q-L-N-E-S-M-D-H-G-G-V-E</b> | ▶ |
| 379 | P19 | NEK6         | P-D-D-T-L-N-D-ST-A-D-A-E-S-L-E       | ▶ |
| 380 | P20 | NEK9         | <b>S-K-T-T-A-A-H-S-L-V-G-T-P-Y-Y</b> | ▶ |
| 381 | P21 | NLK          | <b>S-H-A-V-H-P-L-T-P-L-I-T-Y-S-D</b> | ▶ |
| 382 | P22 | NLK          | <b>T-Y-S-D-E-H-F-S-P-G-S-H-P-S-H</b> | ▶ |
| 383 | P23 | control      | <b>A-W-R-H-P-Q-F-G-G-X-X-X-X</b>     | ▶ |
| 384 | P24 | neg. control | Bio-X-X-X-X-X-X-X-X-X-X-X-X          | ▶ |

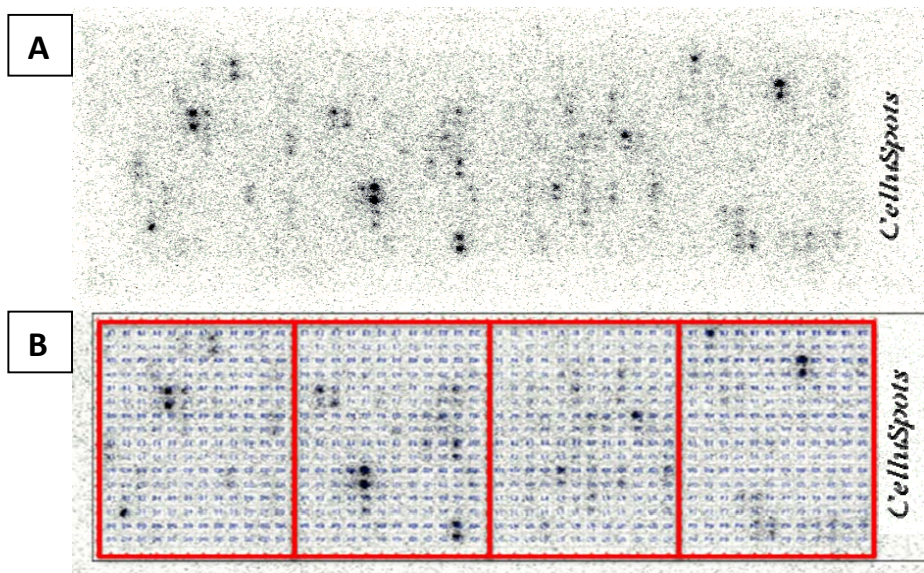

**Figure S1. (A)** Phosphor image of the  $[^{99m}\text{Tc}][\text{Tc}(\text{CO})_3]^+$  radiolabeled STKS-1 Celluspot<sup>TM</sup> peptide array post 48 hour wash in 70% acetonitrile in  $\text{H}_2\text{O}$ . The black dots represent the peptides that have been radiolabelled. **(B)** An overlay of the phosphor image on the Celluspot<sup>TM</sup> template.

### Rationale for design of bespoke His-tagged peptide array

Sequences were included to evaluate classes of peptides to address pre-existing questions and questions arising from analysis of the STKS-1 array, loosely classified as follows:

- His/Cys Peptides: 10 peptide sequences for comparison with homogeneous solution phase labeling. These were based on the CKLAAALEHHHHHH labeling sequence engineered at the C-terminal of the C2A protein for  $[^{99m}\text{Tc}][\text{Tc}(\text{CO})_3]^+$  labelling (9). These 10 sequences contained different His-tags and are present in duplicate with and without an adjacent CK dipeptide: CKLAAALEHHHHHH, LAAALEHHHHHH, CKLAAALEHHHH, LAAALEHHHH, CKLAAALEHAHAHA, LAAALEHAHAHA, CKLAAALEHAHA, LAAALEHAHA, CKLAAALEHAAH, LAAALEHAAH. Each of these was synthesized separately as described elsewhere in this Supplementary Information for homogeneous labeling in solution.

- Distance from Cys (N-terminal His-tag): His/Cys sequences in which the position of the Cys has been varied with respect to the His residues. Cys is positioned between 7 and 1 amino acids from the nearest His. The His-tag is at the N-terminus (Nt) of the sequence.
- C-terminal His-tag: His/Cys peptide sequences with a C-terminal His-Tag.
- His/Cys tag with no Lys: His/Cys sequences without the Lys residues.
- His-tag in the middle: His-tag is embedded within the sequence (i.e. non-terminal) and surrounded by amino acids on either side. The surrounding amino acids are based on the composition of the His/Cys peptide and include Leu, Ala, Glu, Cys or Lys.
- Double cysteine: Two Cys residues within a His containing peptide sequence. One is on the N-terminal and one is on the C-terminal side of the His.
- HHHCHHH: Sequences with a Cys separating two sets of 3 sequential His residues
- Proline: Proline has been included in the His containing sequences at different positions e.g. HHHPHHH, HHHHHHP, HHHPHHHXXXP and HHHHHHXXXP, where X is another amino acid.
- Methionine: Methionine residues have been included in the His containing sequences to replace the Cys (based on the assumption that its interaction with Tc(I) or Re(I) would be similar to Cys but it cannot be oxidized to form disulfide bonds and hence may be more generally useful in proteins.
- Uncharged: His-containing sequences with no charged amino acids. Sequences include hydrophobic spacers such as Leu, Ala or Gly.
- Negatively charged amino acids: Sequences with 2 or more Glu and/or Asp residues surrounding the His.
- Positively charged amino acids: Sequences with 2 or more Arg and/or Lys residues surrounding the His.
- Serine: Sequences with multiple Ser residues surrounding the His.
- Catalytic sequences: Sequences with (His)<sub>6</sub>-Tags and amino acid combinations that form catalytic triads that may affect the reactivity of His e.g. Ser, Asp and His.
- Controls: 4 spots on the Celluspot<sup>TM</sup> peptide array surface: 2 blank spots on the cellulose membrane and two randomly generated peptide sequences that contain no His. All other amino acids are included at least once in one of the sequences.
- HEHEHE Tag: Two His-containing labeling sequences previously published by Tolmachev et al.(11) for the radiolabeling of proteins with [<sup>99m</sup>Tc(CO)<sub>3</sub>]<sup>+</sup>.



**Table S4 (continued on following pages).** Amino acid sequences in His-tagged peptide array. Position of each peptide in the array is given by the grid code which refers to Table S3. Doa = 3,6-dioxa-octanoic acid. Grid codes correspond to the layout shown in Table S3.

| <b>no</b> | <b>Grid code</b> | <b>sequence</b>     | <b>Reason for inclusion</b> | <b>N-terminus</b> |
|-----------|------------------|---------------------|-----------------------------|-------------------|
| 1         | A 1              | HHHHHHELAAAL Doa    | 10 SOLUTION PEPTIDES        | acetylated        |
| 2         | A 2              | HHHHHHELAAALKC Doa  |                             | acetylated        |
| 3         | A 3              | AHAHAHELAAAL Doa    |                             | acetylated        |
| 4         | A 4              | AHAHAHELAAALKC Doa  |                             | acetylated        |
| 5         | A 5              | HHHHELAAAL Doa      |                             | acetylated        |
| 6         | A 6              | HHHHELAAALKC Doa    |                             | acetylated        |
| 7         | A 7              | AHAHELAAAL Doa      |                             | acetylated        |
| 8         | A 8              | AHAHELAAALKC Doa    |                             | acetylated        |
| 9         | A 9              | HAAHELAAAL Doa      |                             | acetylated        |
| 10        | A10              | HAAHELAAALKC Doa    |                             | acetylated        |
| 11        | A11              | HHHHHHELAAALCK Doa  | N-TERMINAL CYSTEINE         | acetylated        |
| 12        | A12              | HHHHHHELAAACLK Doa  |                             | acetylated        |
| 13        | A13              | HHHHHHELAAACALK Doa |                             | acetylated        |
| 14        | A14              | HHHHHHELACAALK Doa  |                             | acetylated        |
| 15        | A15              | HHHHHHELCAAALK Doa  |                             | acetylated        |
| 16        | A16              | HHHHHHECLAAALK Doa  |                             | acetylated        |
| 17        | A17              | HHHHHHCELAAALK Doa  |                             | acetylated        |
| 18        | A18              | AHAHAHELAAALCK Doa  |                             | acetylated        |
| 19        | A19              | AHAHAHELAAACLK Doa  |                             | acetylated        |
| 20        | A20              | AHAHAHELAAACALK Doa |                             | acetylated        |
| 21        | A21              | AHAHAHELACAALK Doa  |                             | acetylated        |
| 22        | A22              | AHAHAHELCAAALK Doa  |                             | acetylated        |
| 23        | A23              | AHAHAHECLAAALK Doa  |                             | acetylated        |
| 24        | A24              | AHAHAHCELAAALK Doa  |                             | acetylated        |
| 25        | B 1              | AHAHELAAALCK Doa    | N-TERMINAL CYSTEINE         | acetylated        |
| 26        | B 2              | AHAHELAAACLK Doa    |                             | acetylated        |
| 27        | B 3              | AHAHELAAACALK Doa   |                             | acetylated        |
| 28        | B 4              | AHAHELACAALK Doa    |                             | acetylated        |
| 29        | B 5              | AHAHELCAAALK Doa    |                             | acetylated        |
| 30        | B 6              | AHAHECLAAALK Doa    |                             | acetylated        |
| 31        | B 7              | HAAHCELAAALK Doa    |                             | acetylated        |
| 32        | B 8              | HAAHELAAALCK Doa    |                             | acetylated        |
| 33        | B 9              | HAAHELAAACLK Doa    |                             | acetylated        |
| 34        | B10              | HAAHELAAACALK Doa   |                             | acetylated        |
| 35        | B11              | HAAHELACAALK Doa    |                             | acetylated        |
| 36        | B12              | HAAHELCAAALK Doa    |                             | acetylated        |
| 37        | B13              | HAAHECLAAALK Doa    |                             | acetylated        |
| 38        | B14              | HAAHCELAAALK Doa    |                             | acetylated        |
| 39        | B15              | CKLAAALEHHHHHH Doa  | C-TERMINAL CYSTEINE         | acetylated        |
| 40        | B16              | CKLAAALEHAAAA Doa   |                             | acetylated        |

|    |     |                    |                                                       |            |
|----|-----|--------------------|-------------------------------------------------------|------------|
| 41 | B17 | CKLAAALEHHHH Doa   |                                                       | acetylated |
| 42 | B18 | CKLAAALEHHAHA Doa  |                                                       | acetylated |
| 43 | B19 | CKLAAALEHAAH Doa   |                                                       | acetylated |
| 44 | B20 | KCLAAALEHHHHHH Doa |                                                       | acetylated |
| 45 | B21 | KLACAALEHHHHHH Doa | DISTANCE FROM<br>CYSTEINE<br>(C-terminal<br>cysteine) | acetylated |
| 46 | B22 | KLAAACLEHHHHHH Doa |                                                       | acetylated |
| 47 | B23 | KLAAALECHHHHHH Doa |                                                       | acetylated |
| 48 | B24 | HHHHHHELAAALC Doa  |                                                       | acetylated |
| 49 | C 1 | AHAHAHELAAALC Doa  |                                                       | acetylated |
| 50 | C 2 | HHHHELAAALC Doa    |                                                       | acetylated |
| 51 | C 3 | AHAHELAAALC Doa    |                                                       | acetylated |
| 52 | C 4 | HAAHELAAALC Doa    |                                                       | acetylated |
| 53 | C 5 | HHHHHHELAAACAL Doa |                                                       | acetylated |
| 54 | C 6 | HHHHHHELCAAAL Doa  |                                                       | acetylated |
| 55 | C 7 | HHHHHHELAAAL Doa   |                                                       | acetylated |
| 56 | C 8 | AHAHAHELAAACAL Doa |                                                       | acetylated |
| 57 | C 9 | AHAHAHELCAAAL Doa  | NO LYSINE                                             | acetylated |
| 58 | C10 | AHAHAHCELAAAL Doa  |                                                       | acetylated |
| 59 | C11 | HHHHELAAACAL Doa   |                                                       | acetylated |
| 60 | C12 | HHHHELCAAAL Doa    |                                                       | acetylated |
| 61 | C13 | HHHHCELAAAL Doa    |                                                       | acetylated |
| 62 | C14 | AHAHELAAACAL Doa   |                                                       | acetylated |
| 63 | C15 | AHAHELCAAAL Doa    |                                                       | acetylated |
| 64 | C16 | AHAHCELAAAL Doa    |                                                       | acetylated |
| 65 | C17 | HAAHELAAACAL Doa   |                                                       | acetylated |
| 66 | C18 | HAAHELCAAAL Doa    |                                                       | acetylated |
| 67 | C19 | HAAHCELAAAL Doa    |                                                       | acetylated |
| 68 | C20 | LAAALEHHHHHH Doa   |                                                       | acetylated |
| 69 | C21 | LAAALEHHAHAHA Doa  | No Cys/Lys<br>(C/N-term His-tag)                      | acetylated |
| 70 | C22 | LAAALEHHAHA Doa    |                                                       | acetylated |
| 71 | C23 | LAAALEHAAH Doa     |                                                       | acetylated |
| 72 | C24 | ALEHHHHHHELAKC Doa |                                                       | acetylated |
| 73 | D 1 | ALEHHHHHHELAC Doa  |                                                       | acetylated |
| 74 | D 2 | ALEHHHHHHELCAK Doa |                                                       | acetylated |
| 75 | D 3 | ALEHHHHHHELCA Doa  |                                                       | acetylated |
| 76 | D 4 | ALEHHHHHHELCAK Doa |                                                       | acetylated |
| 77 | D 5 | ALEHHHHHHELCA Doa  | NON-TERMINAL HIS-<br>TAG, INCLUDING C, K              | acetylated |
| 78 | D 6 | ALEAHAHAHELAKC Doa |                                                       | acetylated |
| 79 | D 7 | ALEAHAHAHELAC Doa  |                                                       | acetylated |
| 80 | D 8 | ALEAHAHAHELCAK Doa |                                                       | acetylated |
| 81 | D 9 | ALEAHAHAHELCA Doa  |                                                       | acetylated |
| 82 | D10 | ALEAHAHAHCELAK Doa |                                                       | acetylated |
| 83 | D11 | ALEAHAHAHCELA Doa  |                                                       | acetylated |

|     |     |                 |     |                                                             |                                   |            |
|-----|-----|-----------------|-----|-------------------------------------------------------------|-----------------------------------|------------|
| 84  | D12 | ALEAHAHELAKC    | Doa |                                                             | acetylated                        |            |
| 85  | D13 | ALEAHAHELCAK    | Doa |                                                             | acetylated                        |            |
| 86  | D14 | ALEAHACELAK     | Doa |                                                             | acetylated                        |            |
| 87  | D15 | ALEAHAHELAC     | Doa |                                                             | acetylated                        |            |
| 88  | D16 | ALEAHAHELCA     | Doa |                                                             | acetylated                        |            |
| 89  | D17 | ALEAHACELA      | Doa |                                                             | acetylated                        |            |
| 90  | D18 | ALEHAAHELAKC    | Doa |                                                             | acetylated                        |            |
| 91  | D19 | ALEHAAHELCAK    | Doa |                                                             | acetylated                        |            |
| 92  | D20 | ALEHAAHCELAK    | Doa |                                                             | acetylated                        |            |
| 93  | D21 | ALEHAAHELAC     | Doa |                                                             | acetylated                        |            |
| 94  | D22 | ALEHAAHELCA     | Doa |                                                             | acetylated                        |            |
| 95  | D23 | ALEHAAHCELA     | Doa |                                                             | acetylated                        |            |
| 96  | D24 | ALEHHHHHHELAK   | Doa |                                                             | NON-TERMINAL HIS-TAG<br>(NO C, K) | acetylated |
| 97  | E 1 | ALEHHHHHHELA    | Doa |                                                             |                                   | acetylated |
| 98  | E 2 | ALEAHAAHELAK    | Doa |                                                             |                                   | acetylated |
| 99  | E 3 | ALEAHAAHELA     | Doa |                                                             |                                   | acetylated |
| 100 | E 4 | ALEAHAHELAK     | Doa |                                                             |                                   | acetylated |
| 101 | E 5 | ALEAHAAHELA     | Doa |                                                             |                                   | acetylated |
| 102 | E 6 | ALEHAAHELAK     | Doa |                                                             |                                   | acetylated |
| 103 | E 7 | ALEHAAHELA      | Doa |                                                             | acetylated                        |            |
| 104 | E 8 | CLEHHHHHHELC    | Doa |                                                             | DOUBLE CYSTEINE                   | acetylated |
| 105 | E 9 | KLCEHHHHHHECLK  | Doa |                                                             |                                   | acetylated |
| 106 | E10 | KLECHHHHHHCELC  | Doa |                                                             |                                   | acetylated |
| 107 | E11 | KLEHHHHHHELC    | Doa | acetylated                                                  |                                   |            |
| 108 | E12 | CKLEHHHHHHELKC  | Doa | acetylated                                                  |                                   |            |
| 109 | E13 | HHHCHHHELAAAL   | Doa | CYSTEINE WITHIN HIS-TAG<br>(compare E, D, K, R, G, S, K, M) | acetylated                        |            |
| 110 | E14 | HHHCHHGLAAAL    | Doa |                                                             | acetylated                        |            |
| 111 | E15 | HHHCHHRLAAAL    | Doa |                                                             | acetylated                        |            |
| 112 | E16 | HHHMHHHGLAAAL   | Doa |                                                             | acetylated                        |            |
| 113 | E17 | HHHMHHHELAAAL   | Doa |                                                             | acetylated                        |            |
| 114 | E18 | HHHCHHDLAAAL    | Doa |                                                             | acetylated                        |            |
| 115 | E19 | HHHCHHSLAAAL    | Doa |                                                             | acetylated                        |            |
| 116 | E20 | HHHCHHKLAAAL    | Doa |                                                             | acetylated                        |            |
| 117 | E21 | HHHHHHELAPALCK  | Doa | PROLINE                                                     | acetylated                        |            |
| 118 | E22 | HHHHHHELAPALC   | Doa |                                                             | acetylated                        |            |
| 119 | E23 | HHHHHHELAPAL    | Doa |                                                             | acetylated                        |            |
| 120 | E24 | HHHPHHHELAAALCK | Doa |                                                             | acetylated                        |            |
| 121 | F 1 | HHHPHHHELAAALC  | Doa |                                                             | acetylated                        |            |
| 122 | F 2 | HHHPHHHELAAAL   | Doa |                                                             | acetylated                        |            |
| 123 | F 3 | HHHPHHHELAPALCK | Doa |                                                             | acetylated                        |            |
| 124 | F 4 | HHHPHHHELAPALC  | Doa |                                                             | acetylated                        |            |
| 125 | F 5 | HHHPHHHELAPAL   | Doa |                                                             | acetylated                        |            |
| 126 | F 6 | HHHHHGLAPALCK   | Doa |                                                             | acetylated                        |            |



|     |     |                  |     |            |            |
|-----|-----|------------------|-----|------------|------------|
| 127 | F 7 | HHHHHHGLAPALC    | Doa |            | acetylated |
| 128 | F 8 | HHHPHHHGLAPALKC  | Doa |            | acetylated |
| 129 | F 9 | HHHPHHHGLAPALC   | Doa |            | acetylated |
| 130 | F10 | HHHPHHHGLAPAL    | Doa |            | acetylated |
| 131 | F11 | HHHPHHHGLAAALKC  | Doa |            | acetylated |
| 132 | F12 | HHHPHHHGLAAALC   | Doa |            | acetylated |
| 133 | F13 | HHHPHHHGGPGKC    | Doa |            | acetylated |
| 134 | F14 | HHHPHHHGGPGC     | Doa |            | acetylated |
| 135 | F15 | HHHHHHPPGGGC     | Doa |            | acetylated |
| 136 | F16 | HHHPHHHPGGGC     | Doa |            | acetylated |
| 137 | F17 | HHHHHHRLAPALKC   | Doa |            | acetylated |
| 138 | F18 | HHHHHHRLAPALC    | Doa |            | acetylated |
| 139 | F19 | HHHPHHHRLAPALKC  | Doa |            | acetylated |
| 140 | F20 | HHHPHHHRLAPALC   | Doa |            | acetylated |
| 141 | F21 | HHHPHHHRLAPAL    | Doa |            | acetylated |
| 142 | F22 | HHHPHHHRLAAALKC  | Doa |            | acetylated |
| 143 | F23 | HHHPHHHRLAAALC   | Doa |            | acetylated |
| 144 | F24 | HHHHHHELAPAM     | Doa |            | acetylated |
| 145 | G 1 | HHHHHHELAPAKM    | Doa |            | acetylated |
| 146 | G 2 | HHHPHHHGGPGKM    | Doa |            | acetylated |
| 147 | G 3 | HHHPHHHGGPGM     | Doa |            | acetylated |
| 148 | G 4 | HHHPHHHPGGGM     | Doa |            | acetylated |
| 149 | G 5 | HHHHHHPPGGGM     | Doa |            | acetylated |
| 150 | G 6 | HHHHHHPELAAALKC  | Doa |            | acetylated |
| 151 | G 7 | HHHHHHPELAAALC   | Doa |            | acetylated |
| 152 | G 8 | HHHHHHPELAAAL    | Doa |            | acetylated |
| 153 | G 9 | HHHHHHPELAAALM   | Doa |            | acetylated |
| 154 | G10 | HHHPHHHELAAALM   | Doa |            | acetylated |
| 155 | G11 | HHHPHHHPELAAAL   | Doa |            | acetylated |
| 156 | G12 | HHHPHHHPELAAALKC | Doa |            | acetylated |
| 157 | G13 | HHHPHHHPELAAALC  | Doa |            | acetylated |
| 158 | G14 | HHHHHHELAAALKM   | Doa | METHIONINE | acetylated |
| 159 | G15 | HHHHHHELAAALM    | Doa |            | acetylated |
| 160 | G16 | HHHHHHELAAAMALK  | Doa |            | acetylated |
| 161 | G17 | HHHHHHELMAAALK   | Doa |            | acetylated |
| 162 | G18 | HHHHHHEMELAAALK  | Doa |            | acetylated |
| 163 | G19 | HHHHHHELAAMAL    | Doa |            | acetylated |
| 164 | G20 | HHHHHHELMAAAL    | Doa |            | acetylated |
| 165 | G21 | HHHHHHEMELAAAL   | Doa |            | acetylated |
| 166 | G22 | MKLEHHHHHHELKM   | Doa |            | acetylated |
| 167 | G23 | KLEMHHHHHHEMELK  | Doa |            | acetylated |
| 168 | G24 | MLEHHHHHHELM     | Doa |            | acetylated |
| 169 | H 1 | LEMHHHHHHEMEL    | Doa |            | acetylated |
| 170 | H 2 | MKLEAHAHELKM     | Doa | acetylated |            |

|     |     |                |     |                          |            |
|-----|-----|----------------|-----|--------------------------|------------|
| 171 | H 3 | MLEAHAHELM     | Doa |                          | acetylated |
| 172 | H 4 | KLEMAHAHMEK    | Doa |                          | acetylated |
| 173 | H 5 | LEMAHAHMEK     | Doa |                          | acetylated |
| 174 | H 6 | KLMEHHHHHEMLK  | Doa |                          | acetylated |
| 175 | H 7 | LMEHHHHHEML    | Doa |                          | acetylated |
| 176 | H 8 | MKLEAHAHAHELMK | Doa |                          | acetylated |
| 177 | H 9 | KLMEAHAHAHEMLK | Doa |                          | acetylated |
| 178 | H10 | KLEMAHAHAHMEK  | Doa |                          | acetylated |
| 179 | H11 | MLEAHAHAHELM   | Doa |                          | acetylated |
| 180 | H12 | MLEAHAHAHELM   | Doa |                          | acetylated |
| 181 | H13 | LEMAHAHAHMEK   | Doa |                          | acetylated |
| 182 | H14 | HHHHHHAMAAAM   | Doa |                          | acetylated |
| 183 | H15 | HMHHMHLAAAL    | Doa |                          | acetylated |
| 184 | H16 | HHHHHHGMGGGM   | Doa |                          | acetylated |
| 185 | H17 | HHHHHHGGGGM    | Doa |                          | acetylated |
| 186 | H18 | AHAHAMAAAM     | Doa |                          | acetylated |
| 187 | H19 | HAAHAMAAAM     | Doa |                          | acetylated |
| 188 | H20 | HHHHHHGLAAALM  | Doa |                          | acetylated |
| 189 | H21 | HHHHHHELAAALM  | Doa |                          | acetylated |
| 190 | H22 | HHHHHRLAAALM   | Doa |                          | acetylated |
| 191 | H23 | HHHHHDLAAALM   | Doa |                          | acetylated |
| 192 | H24 | HHHHHSLAAALM   | Doa |                          | acetylated |
| 193 | I 1 | HHHHHRLAAALKM  | Doa |                          | acetylated |
| 194 | I 2 | HHHHHDLAAALKM  | Doa |                          | acetylated |
| 195 | I 3 | HHHHHHGLAAALKM | Doa |                          | acetylated |
| 196 | I 4 | HHHHHSLAAALKM  | Doa |                          | acetylated |
| 197 | I 5 | KMLEHHHHHELMK  | Doa |                          | acetylated |
| 198 | I 6 | HHHHHLAAAL     | Doa | UNCHARGED RESIDUES       | acetylated |
| 199 | I 7 | HHHHHLAAALKC   | Doa |                          | acetylated |
| 200 | I 8 | HHHHHLAAALC    | Doa |                          | acetylated |
| 201 | I 9 | HHHLAAAL       | Doa |                          | acetylated |
| 202 | I10 | HHHLAAALKC     | Doa |                          | acetylated |
| 203 | I11 | HHHLAAALC      | Doa |                          | acetylated |
| 204 | I12 | AHAHLAAAL      | Doa |                          | acetylated |
| 205 | I13 | AHAHLAAALKC    | Doa |                          | acetylated |
| 206 | I14 | AHAHLAAALC     | Doa |                          | acetylated |
| 207 | I15 | AHLAAAL        | Doa |                          | acetylated |
| 208 | I16 | AHLAAALKC      | Doa |                          | acetylated |
| 209 | I17 | AHLAAALC       | Doa |                          | acetylated |
| 210 | I18 | HAHLAAAL       | Doa |                          | acetylated |
| 211 | I19 | HAHLAAALKC     | Doa |                          | acetylated |
| 212 | I20 | HAHLAAALC      | Doa | acetylated               |            |
| 213 | I21 | HHHHHLEELK     | Doa | NEGATIVE RESIDUES<br>(E) | acetylated |
| 214 | I22 | HHHHHLEEL      | Doa |                          | acetylated |

|     |     |                 |     |                      |            |
|-----|-----|-----------------|-----|----------------------|------------|
| 215 | I23 | HHHHHHALEEEELC  | Doa |                      | acetylated |
| 216 | I24 | EHEHEHELAAAAL   | Doa |                      | acetylated |
| 217 | J 1 | EHEHEHELAAAALC  | Doa |                      | acetylated |
| 218 | J 2 | EHEHEHELAAAALKC | Doa |                      | acetylated |
| 219 | J 3 | EHEHEHGLAAAAL   | Doa |                      | acetylated |
| 220 | J 4 | EHEHEHGLAAAALC  | Doa |                      | acetylated |
| 221 | J 5 | EHEHEHGLAAAALKC | Doa |                      | acetylated |
| 222 | J 6 | EHEHELAAAAL     | Doa |                      | acetylated |
| 223 | J 7 | EHEHELAAAALC    | Doa |                      | acetylated |
| 224 | J 8 | EHEHGLAAAAL     | Doa |                      | acetylated |
| 225 | J 9 | EHEHGLAAAALC    | Doa |                      | acetylated |
| 226 | J10 | HEEHELAAAAL     | Doa |                      | acetylated |
| 227 | J11 | HEEHELAAAALC    | Doa |                      | acetylated |
| 228 | J12 | HHHHHHHEEAAEE   | Doa |                      | acetylated |
| 229 | J13 | HHHHHHHEEAAEEC  | Doa |                      | acetylated |
| 230 | J14 | HHHHHHGEGGGE    | Doa |                      | acetylated |
| 231 | J15 | HHHHHHGEGGEC    | Doa |                      | acetylated |
| 232 | J16 | EHEHEHGEGGGE    | Doa |                      | acetylated |
| 233 | J17 | EHEHEHGEGGEC    | Doa |                      | acetylated |
| 234 | J18 | HHHHHHHEGGGE    | Doa |                      | acetylated |
| 235 | J19 | HHHHHHHEGGGEC   | Doa |                      | acetylated |
| 236 | J20 | EHEHGGAEE       | Doa |                      | acetylated |
| 237 | J21 | EHEHGGAEEC      | Doa |                      | acetylated |
| 238 | J22 | EHEHEHGGAEE     | Doa |                      | acetylated |
| 239 | J23 | EHEHEHGGAEEC    | Doa |                      | acetylated |
| 240 | J24 | GEEHHHHHHEEG    | Doa |                      | acetylated |
| 241 | K 1 | GEEHHHHHHEEGC   | Doa |                      | acetylated |
| 242 | K 2 | GGEHHHEHHHEGG   | Doa |                      | acetylated |
| 243 | K 3 | GGEHHHEHHHEGGC  | Doa |                      | acetylated |
| 244 | K 4 | HHHHHHDLAAAAL   | Doa | NEGATIVE RESIDUE (D) | acetylated |
| 245 | K 5 | HHHHHHDLAAAALC  | Doa |                      | acetylated |
| 246 | K 6 | HHHHHHDLAAAALKC | Doa |                      | acetylated |
| 247 | K 7 | HHHHHHALDDDLKC  | Doa |                      | acetylated |
| 248 | K 8 | HHHHHHALDDDL    | Doa |                      | acetylated |
| 249 | K 9 | HHHHHHALDDDL    | Doa |                      | acetylated |
| 250 | K10 | DHDHDHDLAAAAL   | Doa |                      | acetylated |
| 251 | K11 | DHDHDHDLAAAALC  | Doa |                      | acetylated |
| 252 | K12 | DHDHDHDLAAAALKC | Doa |                      | acetylated |
| 253 | K13 | DHDHDLAAAAL     | Doa |                      | acetylated |
| 254 | K14 | DHDHDLAAAALC    | Doa |                      | acetylated |
| 255 | K15 | HDDHDLAAAAL     | Doa |                      | acetylated |
| 256 | K16 | HDDHDLAAAALC    | Doa |                      | acetylated |
| 257 | K17 | HHHHHHDDAADD    | Doa |                      | acetylated |
| 258 | K18 | HHHHHHDDAADD    | Doa |                      | acetylated |

|     |     |                |     |                           |            |
|-----|-----|----------------|-----|---------------------------|------------|
| 259 | K19 | HHHHHHGDGGD    | Doa |                           | acetylated |
| 260 | K20 | HHHHHHGDGGDC   | Doa |                           | acetylated |
| 261 | K21 | DHDHDHGDDGD    | Doa |                           | acetylated |
| 262 | K22 | DHDHDHGDDGDC   | Doa |                           | acetylated |
| 263 | K23 | HHHHHHDDGGGD   | Doa |                           | acetylated |
| 264 | K24 | HHHHHHDDGGGDC  | Doa |                           | acetylated |
| 265 | L 1 | DHDHGGAAD      | Doa |                           | acetylated |
| 266 | L 2 | DHDHGGAADC     | Doa |                           | acetylated |
| 267 | L 3 | DHDHDHGGAAD    | Doa |                           | acetylated |
| 268 | L 4 | DHDHDHGGAADC   | Doa |                           | acetylated |
| 269 | L 5 | GDDHHHHHDDG    | Doa |                           | acetylated |
| 270 | L 6 | GDDHHHHHDDGC   | Doa |                           | acetylated |
| 271 | L 7 | GGDHHHDHHHDGG  | Doa |                           | acetylated |
| 272 | L 8 | GGDHHHDHHHDGGC | Doa |                           | acetylated |
| 273 | L 9 | HHHHHHDAEAD    | Doa | NEGATIVE RESIDUES (E & D) | acetylated |
| 274 | L10 | HHHHHHDAEADKC  | Doa |                           | acetylated |
| 275 | L11 | HHHHHHDAEADC   | Doa |                           | acetylated |
| 276 | L12 | EHEHEHGGAADC   | Doa |                           | acetylated |
| 277 | L13 | EHEHEHGGAAD    | Doa |                           | acetylated |
| 278 | L14 | DHDHDHGGAAE    | Doa |                           | acetylated |
| 279 | L15 | DHDHDHGGAEC    | Doa |                           | acetylated |
| 280 | L16 | HHHHHHDDAEE    | Doa |                           | acetylated |
| 281 | L17 | HHHHHHDDAEEC   | Doa |                           | acetylated |
| 282 | L18 | DHDHGGAEE      | Doa |                           | acetylated |
| 283 | L19 | DHDHGGAEC      | Doa |                           | acetylated |
| 284 | L20 | EHEHGGAAD      | Doa |                           | acetylated |
| 285 | L21 | EHEHGGAADC     | Doa |                           | acetylated |
| 286 | L22 | HHHHHHHEAAAD   | Doa |                           | acetylated |
| 287 | L23 | HHHHHHHEAAADC  | Doa |                           | acetylated |
| 288 | L24 | GEEHHHHHDDGC   | Doa |                           | acetylated |
| 289 | M 1 | GEEHHHHHDDG    | Doa |                           | acetylated |
| 290 | M 2 | GGEHHHDHHHEGG  | Doa | acetylated                |            |
| 291 | M 3 | GGEHHHDHHHEGGC | Doa | acetylated                |            |
| 292 | M 4 | HHHHHHRLAAAL   | Doa | POSITIVE RESIDUE (R)      | acetylated |
| 293 | M 5 | HHHHHHRLAAALC  | Doa |                           | acetylated |
| 294 | M 6 | HHHHHHRLAAALKC | Doa |                           | acetylated |
| 295 | M 7 | HHHHHHALRRRL   | Doa |                           | acetylated |
| 296 | M 8 | HHHHHHALRRRLKC | Doa |                           | acetylated |
| 297 | M 9 | HHHHHHALRRRLC  | Doa |                           | acetylated |
| 298 | M10 | RHRHRRLAAAL    | Doa |                           | acetylated |
| 299 | M11 | RHRHRRLAAALC   | Doa |                           | acetylated |
| 300 | M12 | RHRHRRLAAALKC  | Doa |                           | acetylated |
| 301 | M13 | RHRRLAAAL      | Doa |                           | acetylated |
| 302 | M14 | RHRRLAAALC     | Doa | acetylated                |            |

|     |     |                |     |           |            |
|-----|-----|----------------|-----|-----------|------------|
| 303 | M15 | RHRHRLAAALKC   | Doa |           | acetylated |
| 304 | M16 | HRRHRLAAAL     | Doa |           | acetylated |
| 305 | M17 | HRRHRLAAALC    | Doa |           | acetylated |
| 306 | M18 | HHHHHRRRAARR   | Doa |           | acetylated |
| 307 | M19 | HHHHHRRRAARRC  | Doa |           | acetylated |
| 308 | M20 | HHHHHGRGGGR    | Doa |           | acetylated |
| 309 | M21 | HHHHHGRGGRC    | Doa |           | acetylated |
| 310 | M22 | HHHHHGRGGGR    | Doa |           | acetylated |
| 311 | M23 | HHHHHGRGGRC    | Doa |           | acetylated |
| 312 | M24 | HHHHHRARAR     | Doa |           | acetylated |
| 313 | N 1 | HHHHHRARARC    | Doa |           | acetylated |
| 314 | N 2 | RHRHRHGRGGGR   | Doa |           | acetylated |
| 315 | N 3 | RHRHRHGRGGRC   | Doa |           | acetylated |
| 316 | N 4 | RHRHGGAAR      | Doa |           | acetylated |
| 317 | N 5 | RHRHGGAARC     | Doa |           | acetylated |
| 318 | N 6 | RHRHRHGGAAR    | Doa |           | acetylated |
| 319 | N 7 | RHRHRHGGAARC   | Doa |           | acetylated |
| 320 | N 8 | GRRHHHHHRRG    | Doa |           | acetylated |
| 321 | N 9 | CRRHHHHHRRRC   | Doa |           | acetylated |
| 322 | N10 | GGRHHHRHHHRGG  | Doa |           | acetylated |
| 323 | N11 | GGRHHHRHHHRGGC | Doa |           | acetylated |
| 324 | N12 | HHHHHSLAAAL    | Doa |           | acetylated |
| 325 | N13 | HHHHHSLAAALKC  | Doa |           | acetylated |
| 326 | N14 | HHHHHSLAAALC   | Doa |           | acetylated |
| 327 | N15 | HHHHHALSSSL    | Doa |           | acetylated |
| 328 | N16 | HHHHHALSSSLC   | Doa |           | acetylated |
| 329 | N17 | SHSHSHSLAAAL   | Doa |           | acetylated |
| 330 | N18 | SHSHSHSLAAALC  | Doa |           | acetylated |
| 331 | N19 | SHSHSHSLAAALKC | Doa |           | acetylated |
| 332 | N20 | SHSHSLAAAL     | Doa |           | acetylated |
| 333 | N21 | SHSHSLAAALC    | Doa |           | acetylated |
| 334 | N22 | HHHHHSSAASS    | Doa | SERINE, S | acetylated |
| 335 | N23 | HHHHHSSAASSC   | Doa |           | acetylated |
| 336 | N24 | SHSHSHGSGGS    | Doa |           | acetylated |
| 337 | O 1 | SHSHSHGSGGSC   | Doa |           | acetylated |
| 338 | O 2 | HHHHHSGGGS     | Doa |           | acetylated |
| 339 | O 3 | HHHHHSGGGSC    | Doa |           | acetylated |
| 340 | O 4 | HHHHHSASAS     | Doa |           | acetylated |
| 341 | O 5 | HHHHHSASASC    | Doa |           | acetylated |
| 342 | O 6 | GSSHHHHHSSG    | Doa |           | acetylated |
| 343 | O 7 | GSSHHHHHSSGC   | Doa |           | acetylated |
| 344 | O 8 | GGSHHSHHSHGG   | Doa |           | acetylated |
| 345 | O 9 | GGSHHSHHSHGGC  | Doa |           | acetylated |
| 346 | O10 | HHHHHKLAAAL    | Doa | LYSINE, K | acetylated |

|     |     |                 |     |                             |            |
|-----|-----|-----------------|-----|-----------------------------|------------|
| 347 | O11 | HHHHHHALKKKL    | Doa |                             | acetylated |
| 348 | O12 | HHHHHHALKKKLC   | Doa |                             | acetylated |
| 349 | O13 | KHKHKHKLAAAL    | Doa |                             | acetylated |
| 350 | O14 | KHKHKHKLAAALC   | Doa |                             | acetylated |
| 351 | O15 | HHHHHKKAAAK     | Doa |                             | acetylated |
| 352 | O16 | HHHHHKKAAAKC    | Doa |                             | acetylated |
| 353 | O17 | KHKHKHGKGGK     | Doa |                             | acetylated |
| 354 | O18 | KHKHKHGKGGKC    | Doa |                             | acetylated |
| 355 | O19 | HHHHHKGGGK      | Doa |                             | acetylated |
| 356 | O20 | HHHHHKGGGKC     | Doa |                             | acetylated |
| 357 | O21 | HHHHHKAKAK      | Doa |                             | acetylated |
| 358 | O22 | HHHHHKAKAKC     | Doa |                             | acetylated |
| 359 | O23 | GKKHHHHHKKG     | Doa |                             | acetylated |
| 360 | O24 | GKKHHHHHKKGC    | Doa |                             | acetylated |
| 361 | P 1 | GGKHHHKKHKKGG   | Doa |                             | acetylated |
| 362 | P 2 | GGKHHHKKHKKGC   | Doa |                             | acetylated |
| 363 | P 3 | AHAAHELAAAL     | Doa | RANDOM                      | acetylated |
| 364 | P 4 | AHAAHELAAALC    | Doa |                             | acetylated |
| 365 | P 5 | REEVPRRGLSAGHR  | Doa |                             | acetylated |
| 366 | P 6 | GYLRKPKSMHKRFFV | Doa | INTER-ARRAY<br>COMPARISON   | acetylated |
| 367 | P 7 | EKKTKIRSLHNKLLN | Doa |                             | acetylated |
| 368 | P 8 | RRLKGPPTPAFPHYL | Doa |                             | acetylated |
| 369 | P 9 | .space          |     | UNMODIFIED CONTROL          | empty      |
|     |     |                 |     | BLANK ACETYLATED<br>CONTROL |            |
| 370 | P10 |                 | HAc |                             | acetylated |
| 371 | P11 | DGGHHHDHHHGGD   | Doa |                             | acetylated |
| 372 | P12 | DGGHHHHHGGD     | Doa |                             | acetylated |
| 373 | P13 | HHHHHGRCRG      | Doa |                             | acetylated |
| 374 | P14 | RCRGHHHHHGRCR   | Doa |                             | acetylated |
| 375 | P15 | HHHHHGDCDG      | Doa |                             | acetylated |
| 376 | P16 | DCDGHHHHHGDCD   | Doa | CATALYTIC                   | acetylated |
| 377 | P17 | HHHHHGQCSG      | Doa |                             | acetylated |
| 378 | P18 | SCQGHHHHHGQCS   | Doa |                             | acetylated |
| 379 | P19 | SGGHHHHHGGD     | Doa |                             | acetylated |
| 380 | P20 | GGSHHHHHDGG     | Doa |                             | acetylated |
| 381 | P21 | GQLVNEREGASPPWY | Doa | RANDOM                      | acetylated |
| 382 | P22 | RKNDDSTYAGMIMFE | Doa |                             | acetylated |
| 383 | P23 | GSSHHHHHLQVDNK  | Doa |                             | acetylated |
| 384 | P24 | MHEHEHEAENKFNKE | Doa | HEHEHE COMPARISON           | acetylated |

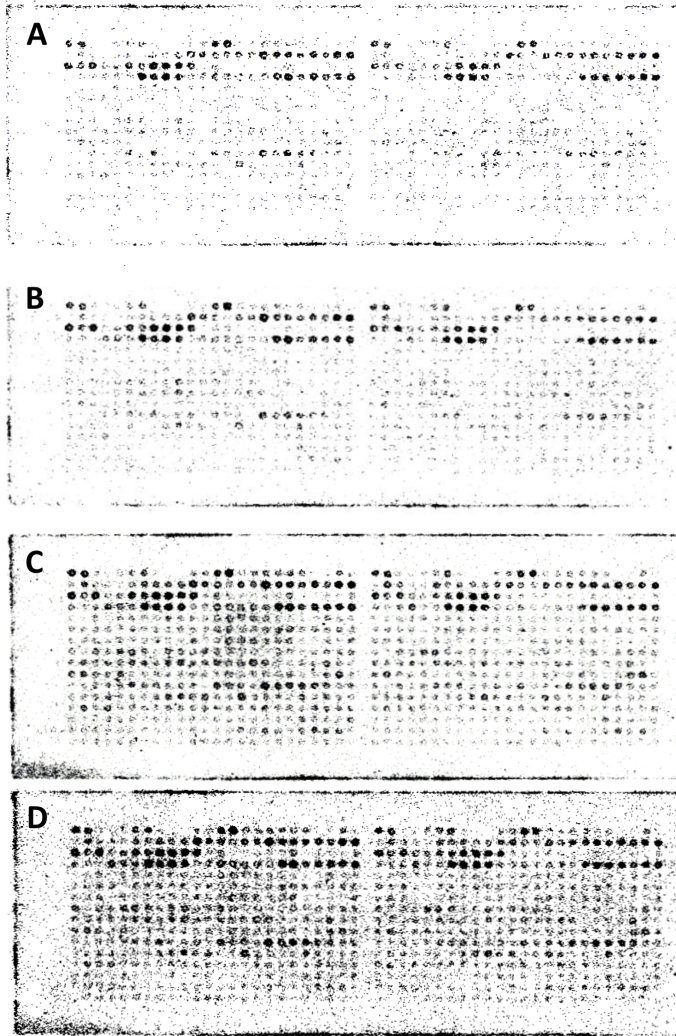

**Figure S2.** Phosphor image of the  $[^{99m}\text{Tc}(\text{CO})_3]^+$  radiolabeled His-Tagged Celluspot<sup>TM</sup> peptide array. Each black spot represents a peptide sequence. **A)** Image after 15 minutes total incubation time, **B)** Image after 30 minute total incubation time, **C)** Image after 60 minute total incubation time and **D)** Image after 120 minute incubation time.

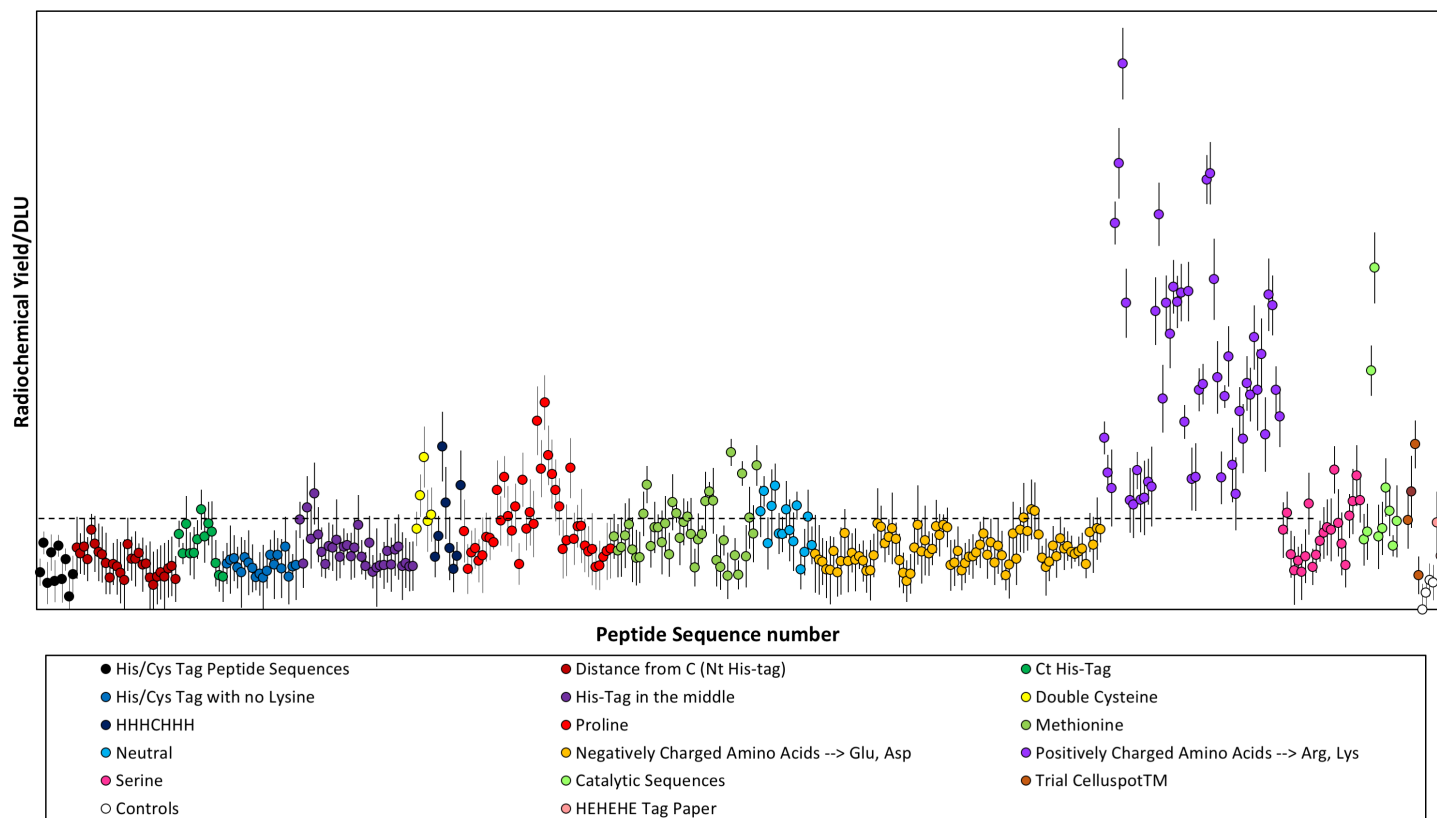

**Figure S3.** Radiochemical yield of all 384 peptides on the Celluspot<sup>TM</sup> His-tagged peptide array post radiolabeling with  $[^{99m}\text{Tc}][\text{Tc}(\text{CO})_3]^+$  (15 minutes incubation time) in PBS at pH 7.4. Results and standard deviations are calculated based on 6 normalized sets of data. The peptides are categorized and color-coded according to their characteristic features of the amino acids that surround the His residues and the arrangement of these amino acids with regards to the His residues. The black horizontal broken line on the graph emphasises the clear boundary between the ten His/Cys tag peptides labeled in solution (black category) and the peptides containing 2 or more Arg/Lys residues (purple category). The extent of the positive charge influence on labeling is highlighted in the two categories “Proline” (red) and “Catalytic Sequences” (lime green, extreme right). Within these categories it is possible to see some individual sequences with a superior radiochemical yield in comparison to all other sequences in that category. These “superior” sequences all contain at least 2 Arg residues. For example in the “Catalytic Sequences” category, of the 8 peptides only two contain multiple Arg residues, GRCRHHHHHH and RCRHHHHHHGRCR, and these are the two that show a preferential coordination to  $[^{99m}\text{Tc}(\text{CO})_3]^+$ .



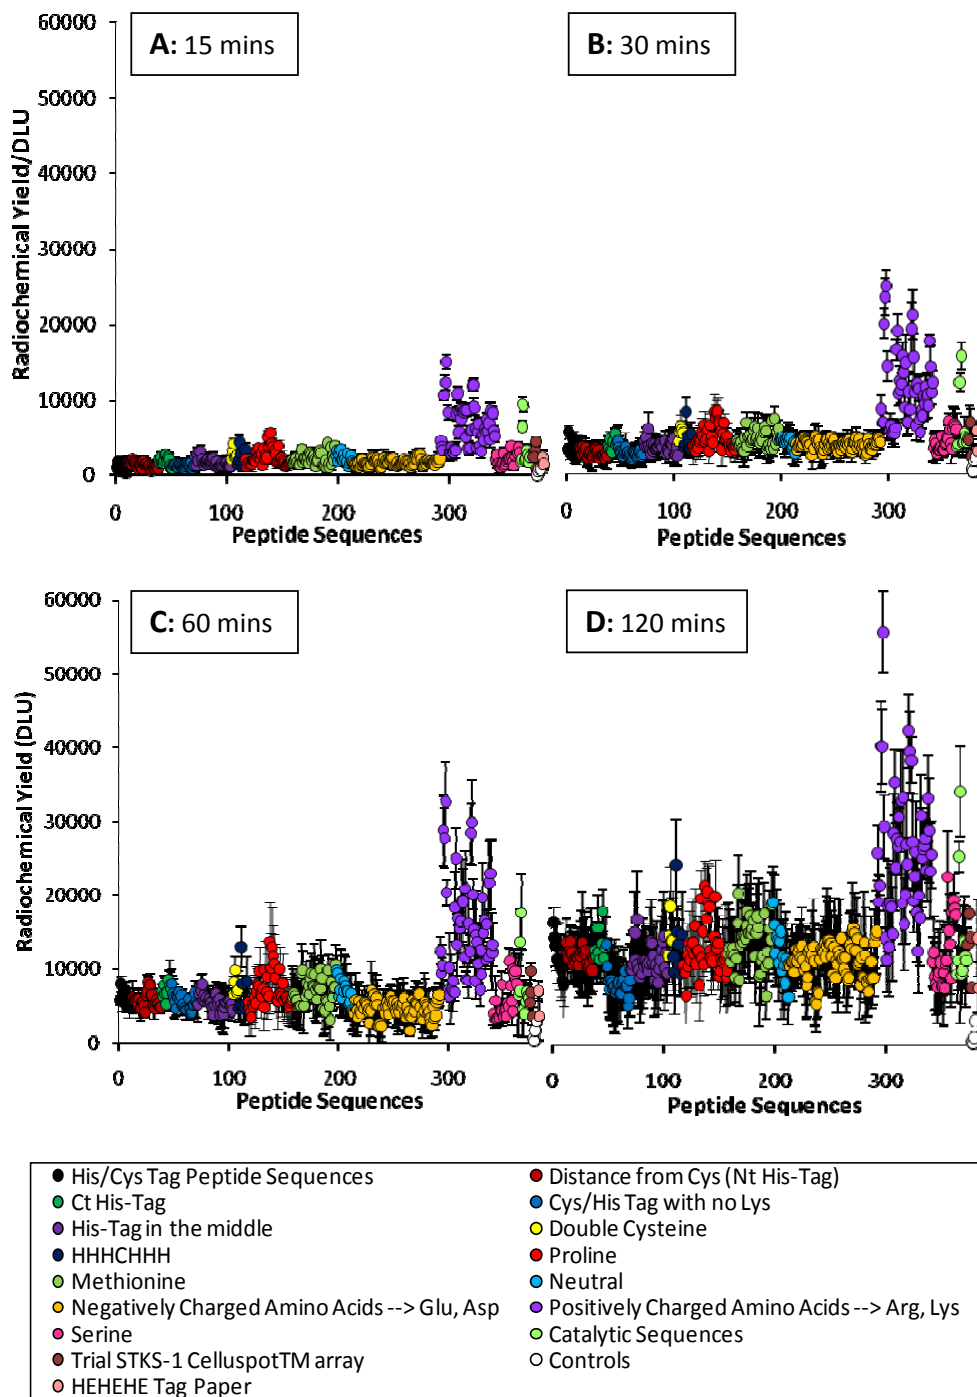

**Figure S4.** Time dependence of radiochemical yield of all 384 peptides on the His-Tagged Celluspot™ peptide array post radiolabeling with  $[^{99m}\text{Tc}(\text{CO})_3]^+$  in PBS at pH 7.4, showing increased labeling with time. Trends evident at 120 min are already emerging by 15 min. Results and standard deviations are calculated based on 6 sets of data. **A)** 15 min, **B)** 30 min, **C)** 60 min, **D)** 120 min.

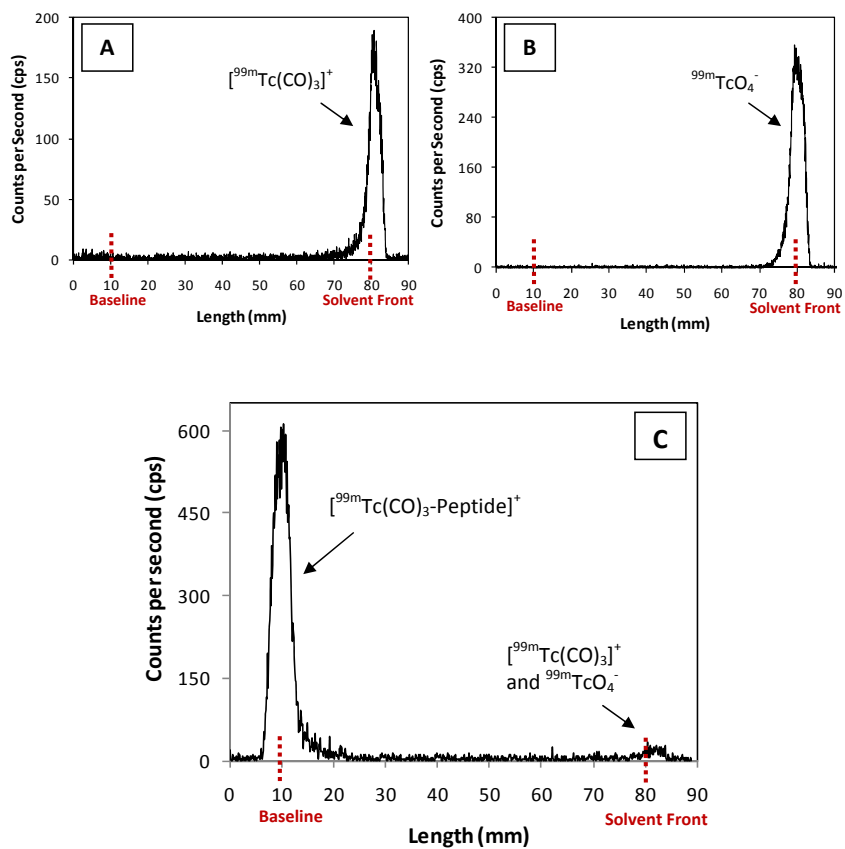

**Fig. S5. Exemplar iTLC quality control of labeling of synthesized soluble peptides.** iTLC-SA strips (7.5 x 90 mm) had an origin at 10 mm and a solvent front at 80 mm. A mobile phase of citrate buffer at pH 5.5 was used. **A)** Unbound  $[^{99m}\text{Tc}(\text{CO})_3]^+$ ,  $R_f = 1$ ; **B)** Unreduced  $^{99m}\text{TcO}_4^-$ ,  $R_f = 1$ ; **C)** Cys/His-Tag labelling reaction with  $[^{99m}\text{Tc}(\text{CO})_3]^+$ . The  $[^{99m}\text{Tc}(\text{CO})_3\text{-peptide}]$  conjugate had  $R_f = 0$  in all cases.

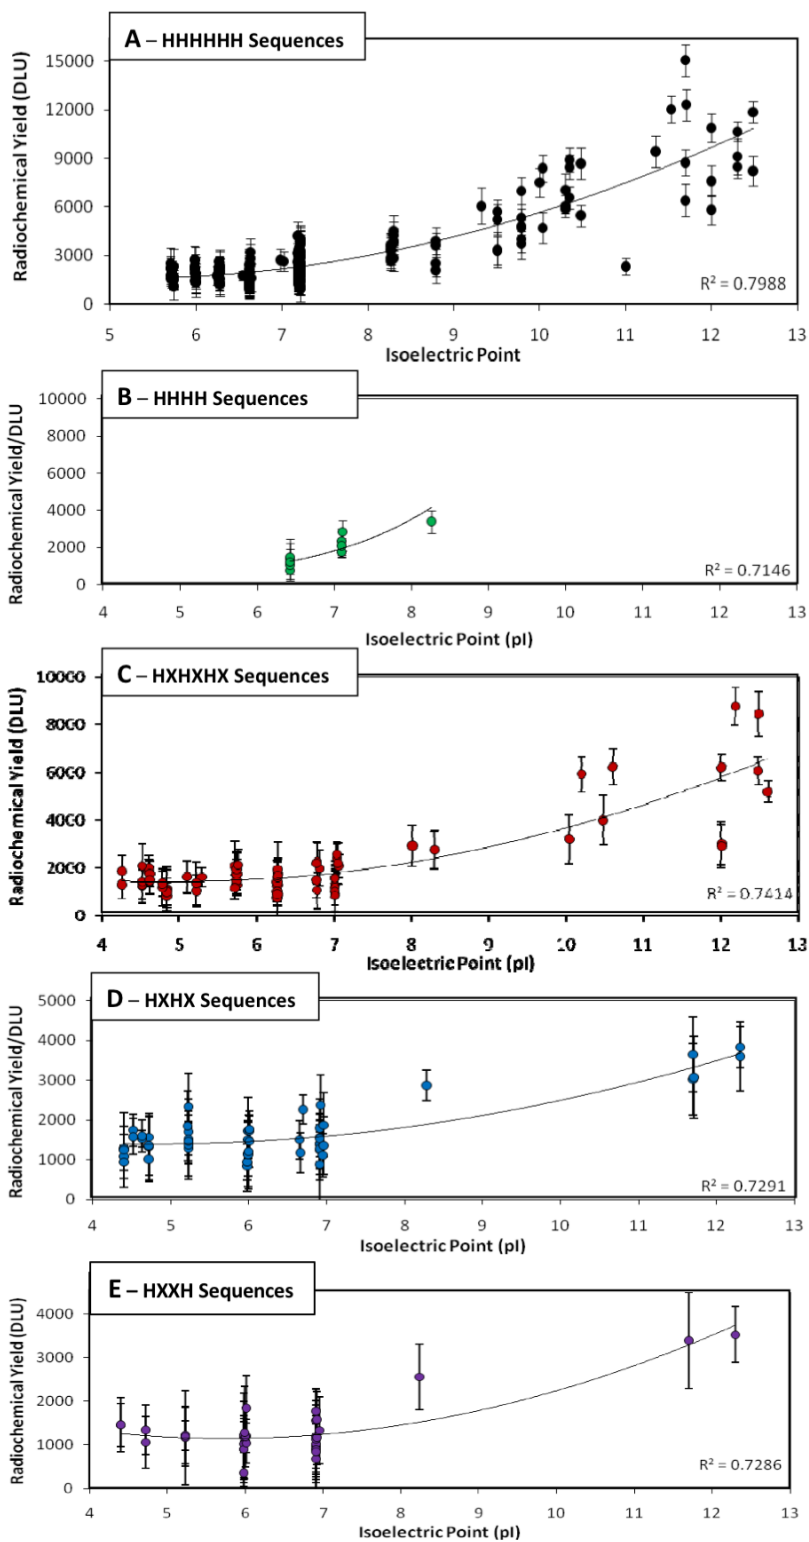

**Figure S6.** A comparison between the radiochemical yield and pI of the peptide sequences, classified according to types of His tag (number and position/interruption of His residues in the sequences). **A)** 6 His residues, HHHHHH; **B)** 4 His residues, HHHH; **C)** 3 His residues in a HXHXHX motif; **D)** 2 His residues in a HXHX motif; and, **E)** 2 His residues in a HXXH motif.

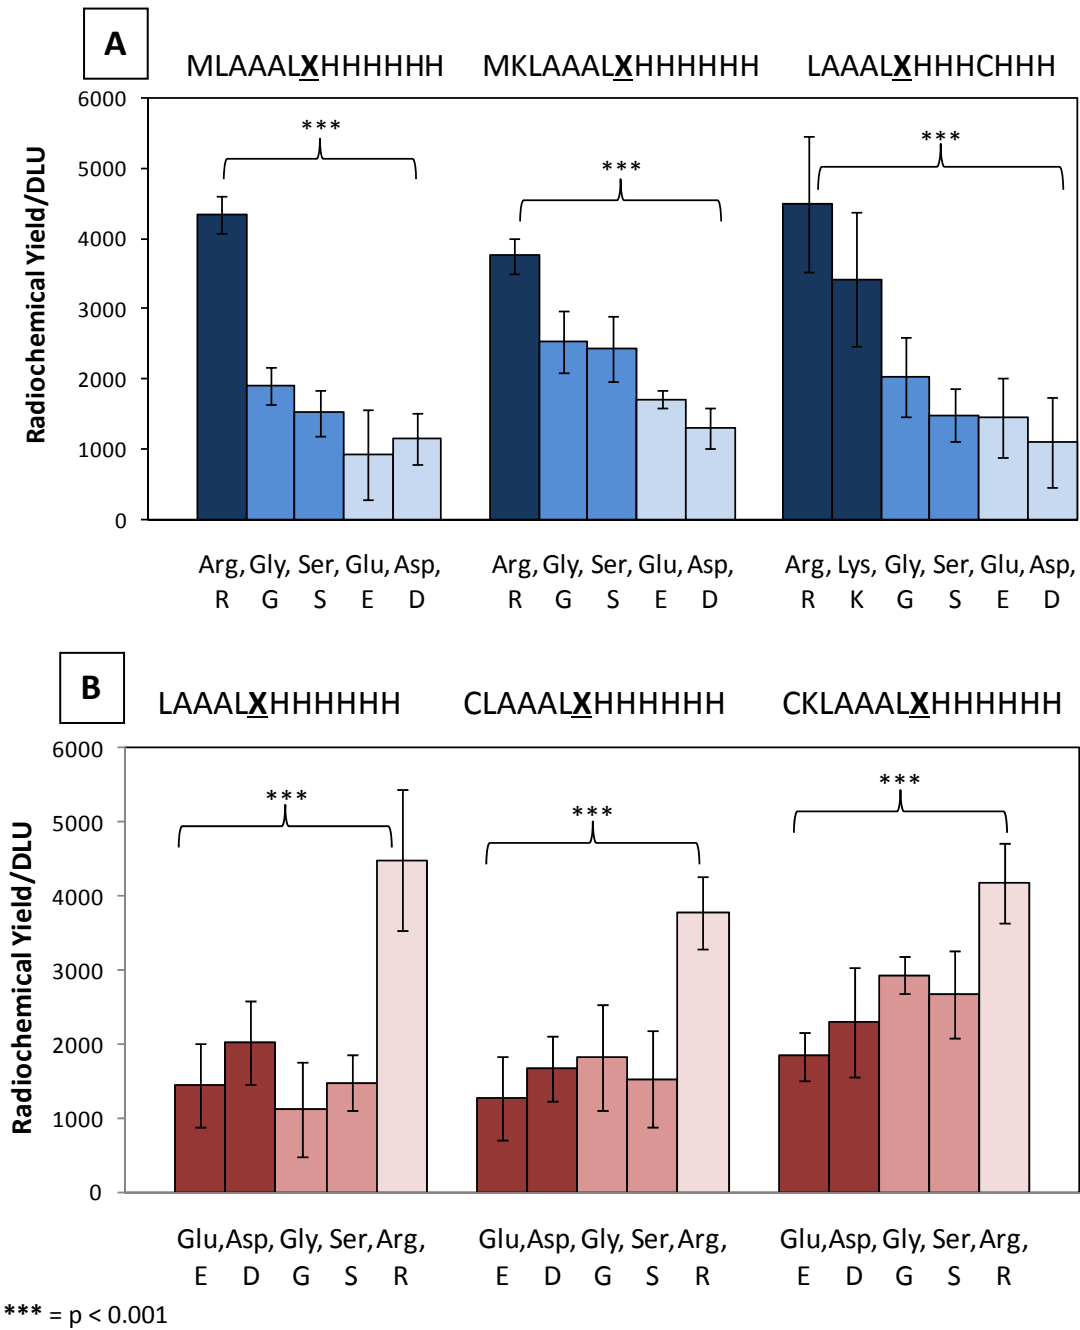

**Figure S7.** Comparison between the radiochemical yield of labelling sequences containing an Arg, Lys, Gly, Ser, Glu and Asp amino acid adjacent to the His tag. A single amino acid has been “point-mutated” in the X position within each sequence **A**: MLAAALXHHHHHH, MKLAAALXHHHHHH and LAAALXHHHCCHH sequences, **B**: LAAALXHHHHHH, CLAAALXHHHHHH, CKLAAALXHHHHHH sequences. There is a significant enhancement ( $p < 0.001$ ) when X = arginine.

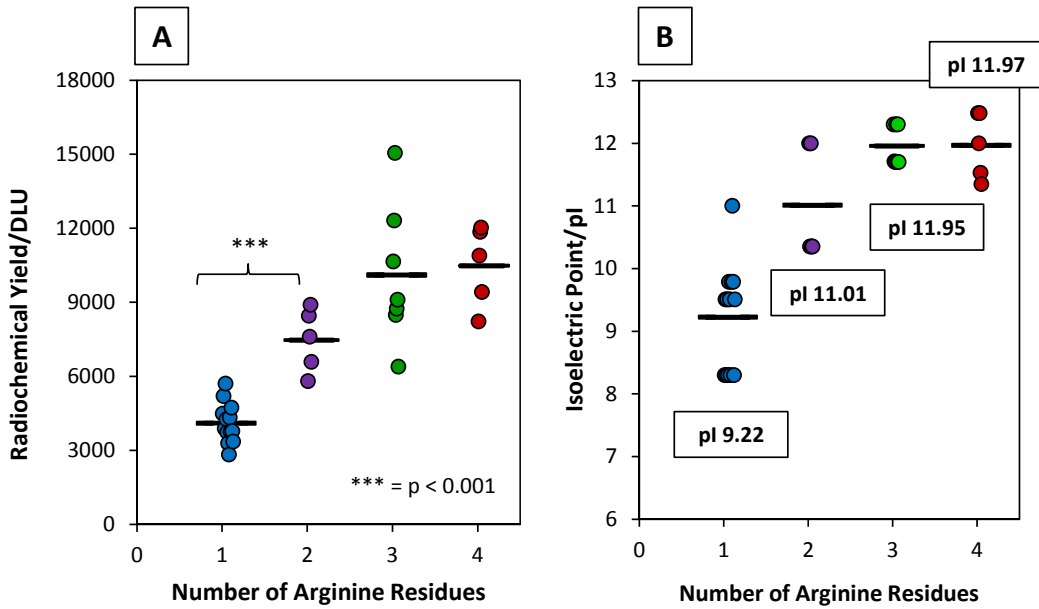

**Figure S8.** Effect of multiple arginine residues: number of Arg residues within a peptide sequence plotted against the radiochemical yield of the sequence (A) and pI (B, mean pI shown for each group). All sequences include a His-Tag, HHHHHH and the Arg residues are positioned on either side of the His<sub>6</sub>-Tag, both sides of the His<sub>6</sub>-Tag or in between the His residues. Increasing the number of Arg residues increases both labeling yield and pI compared to a single Arg residue.

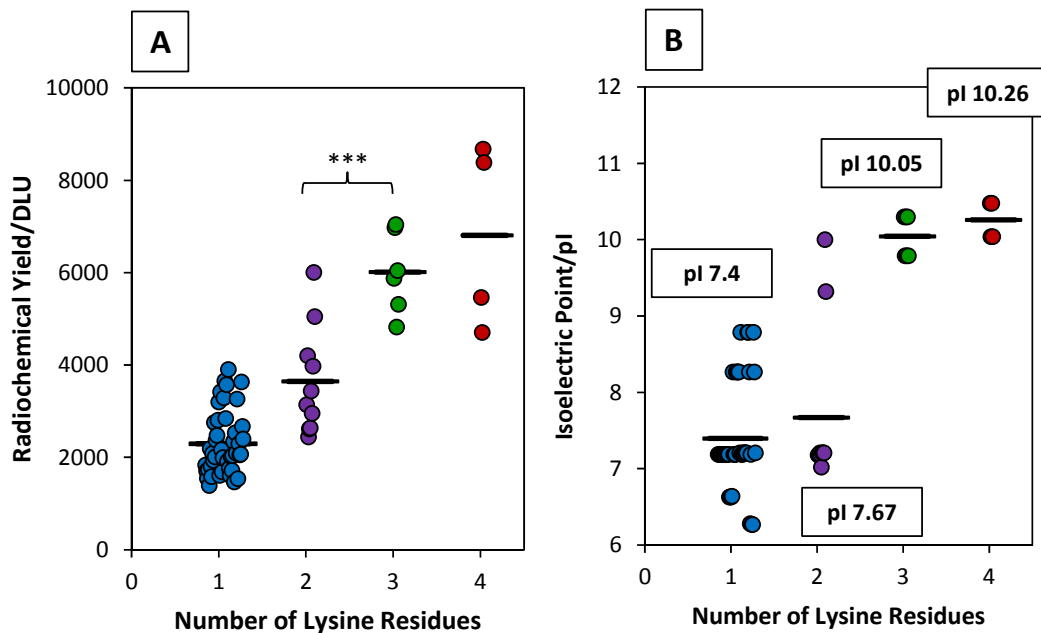

**Figure S9.** Effect of lysine residues on labeling efficiency: number of Lys residues within a peptide sequence plotted against the radiochemical yield of the sequence (A) and pI (B). All sequences include a His-Tag, HHHHHH and the Lys are positioned: on either side of the His<sub>6</sub>-Tag, both sides of the His<sub>6</sub>-Tag or in between the His residues. Increasing the number of lysine residues enhances both labeling efficiency and pI.

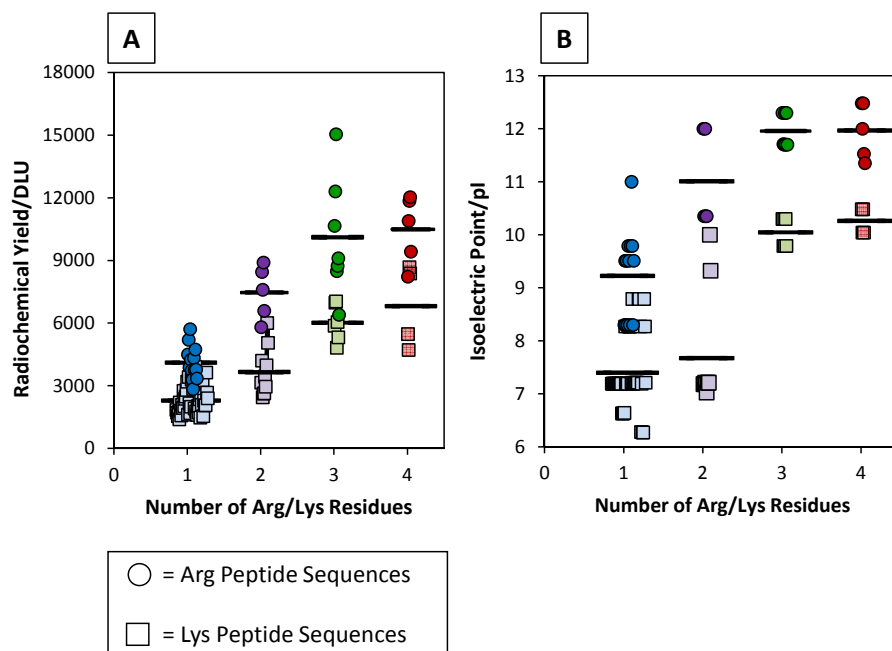

**Figure S10.** Combined data for the number of Lys and Arg residues within a peptide sequence plotted against the radiochemical yield of the sequence (A) and pI (B). Arg containing sequences are better than Lys containing sequences at improving radiochemical yield. All sequences include a His<sub>6</sub>-Tag, HHHHHH.

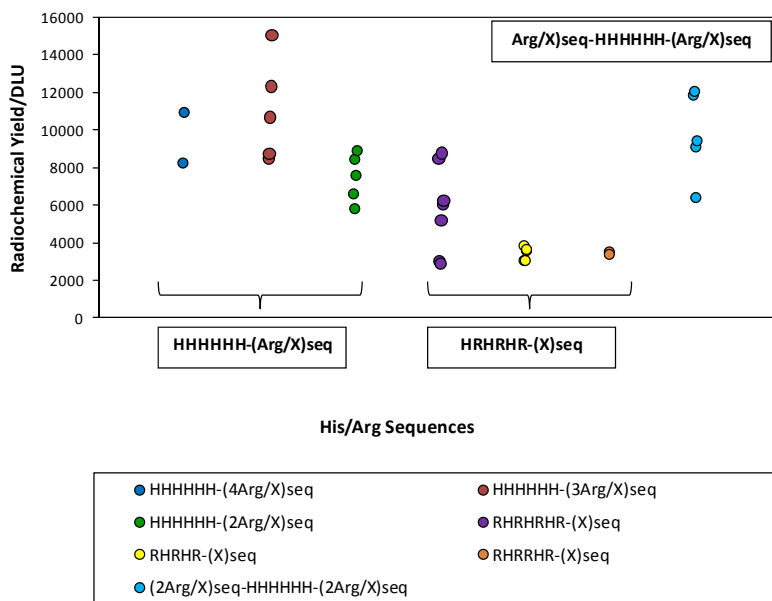

**Figure S11.** Comparisons between positions of Arg residues with respect to the His amino acids. The sequences have been categorized according to the positioning of the His residues: **HHHHHH-(Arg/X)**, **HRHRHR-(X)** and **(Arg/X)-HHHHHH-(Arg/X)**. X = any amino acid other than Arg or His. Placing arginine residues either side of the histidine sequence increases labeling efficiency more effectively than interrupting the histidine sequence.

**Table S5.** Occurrence of Cys residues in the ten most efficiently labeled sequences of the His tag array. Cysteine-containing residues are shaded.

| Sequence       | Labeling efficiency rank | Labeling efficiency, DLU |
|----------------|--------------------------|--------------------------|
| HHHHHHALRRRLC  | 1                        | 15049                    |
| HHHHHHALRRRLKC | 2                        | 12308                    |
| CRRHHHHHHHRRRC | 3                        | 12029                    |
| GRRHHHHHHHRRRG | 4                        | 11858                    |
| HHHHHHHRAARRC  | 5                        | 10894                    |
| HHHHHHALRRRL   | 6                        | 10656                    |
| RCRGHHHHHHGRCR | 7                        | 9419                     |
| GGRHHHRHHHRGG  | 8                        | 9107                     |
| HHHHHHRGGGRC   | 9                        | 8897                     |
| RHRHRHGRGGRC   | 10                       | 8767                     |

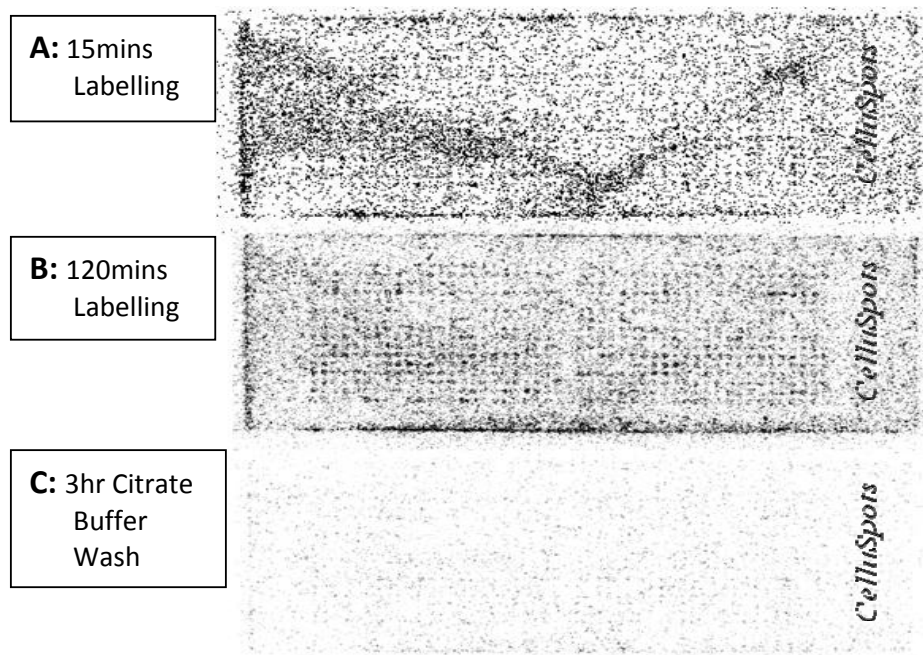

**Figure S12.** Labeling in citrate buffer: phosphor images of the  $[^{99m}\text{Tc}(\text{CO})_3]^+$  radiolabeled His-Tagged Cellusspots<sup>TM</sup> array after radiolabeling in citrate buffer at pH 5.1, rather than PBS. **A)** Image after radiolabeling for 15 min; **B)** Image after radiolabeling for 120 min; **C)** Image after incubation for 120 min followed by exposure to a His containing solution for 3h. Labeling at pH 5.1 leads to peptide labeling that is much less efficient than in PBS, much less selective for positively charged residues and much less stable towards loss of label.



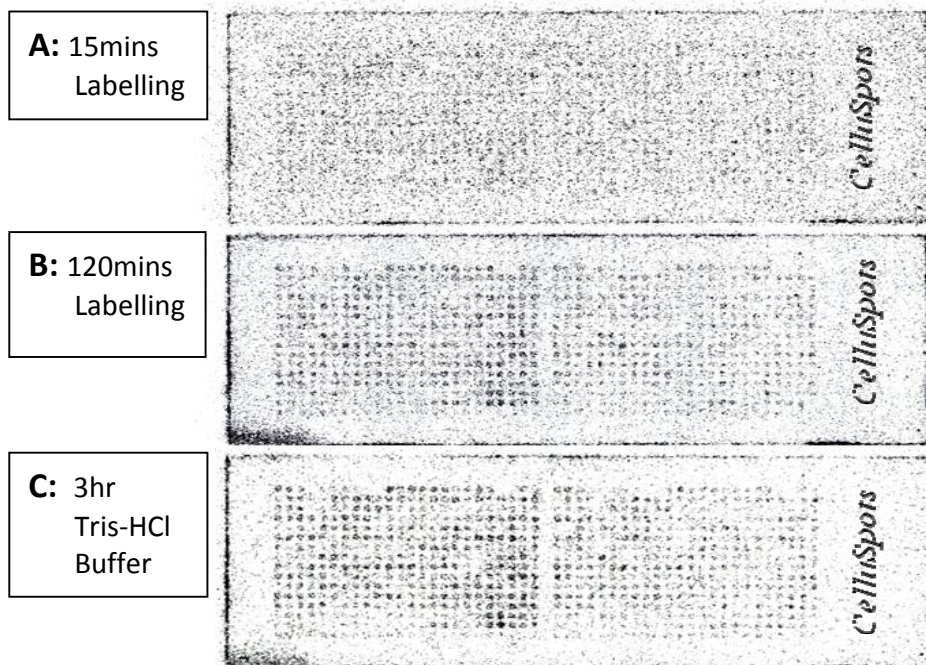

**Figure S13.** Labeling in Tris-HCl buffer (pH 8.8): phosphor images of the  $[^{99m}\text{Tc}(\text{CO})_3]^+$  radiolabeled His-Tagged CellusSpots<sup>TM</sup> peptide array after radiolabeling in Tris-HCl buffer at pH 8.8, rather than PBS. **A)** Image after radiolabeling for 15 min; **B)** Image after radiolabeling for 120 min; **C)** Image after incubation for 120 min followed by exposure to Tris-HCl buffer for 3h. Labeling at pH 5.1 leads to peptide labeling that is much less efficient than in PBS and much less selective for positively charged residues.

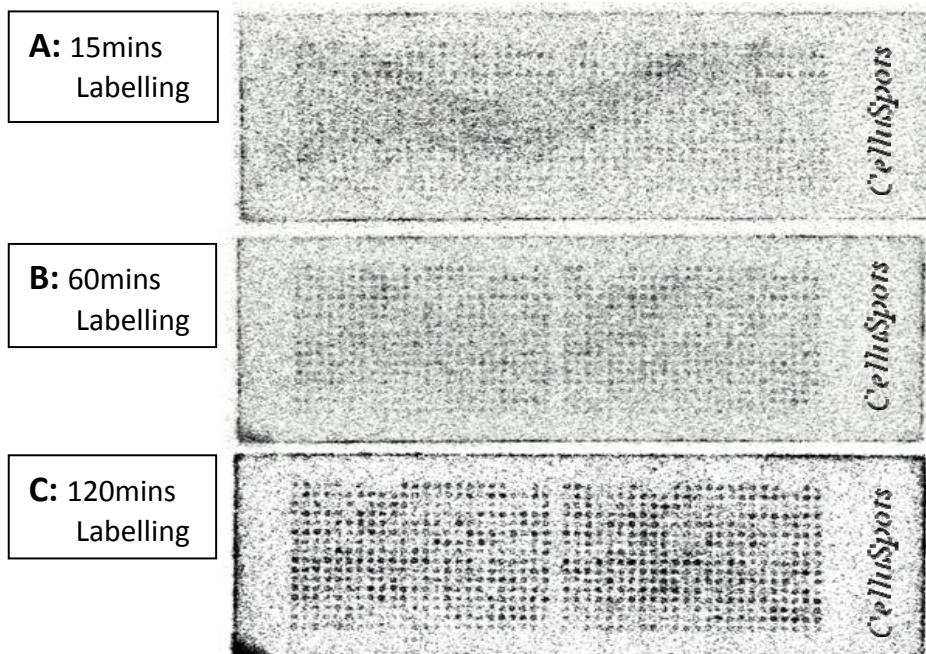

**Figure S14.** Labeling in Tris-HCl buffer (pH 7.4): phosphor images of the  $[^{99m}\text{Tc}][\text{Tc}(\text{CO})_3]^+$  radiolabeled His-Tagged CelluSpot™ peptide array after radiolabeling in Tris-HCl buffer at pH 8.8, rather than PBS. **A)** Image after radiolabeling for 15 min; **B)** Image after radiolabeling for 120 min; **C)** Image after radiolabeling for 120 min. Labeling is more efficient than in Tris-HCl buffer at pH 8.8 but is not comparable to labeling in PBS.

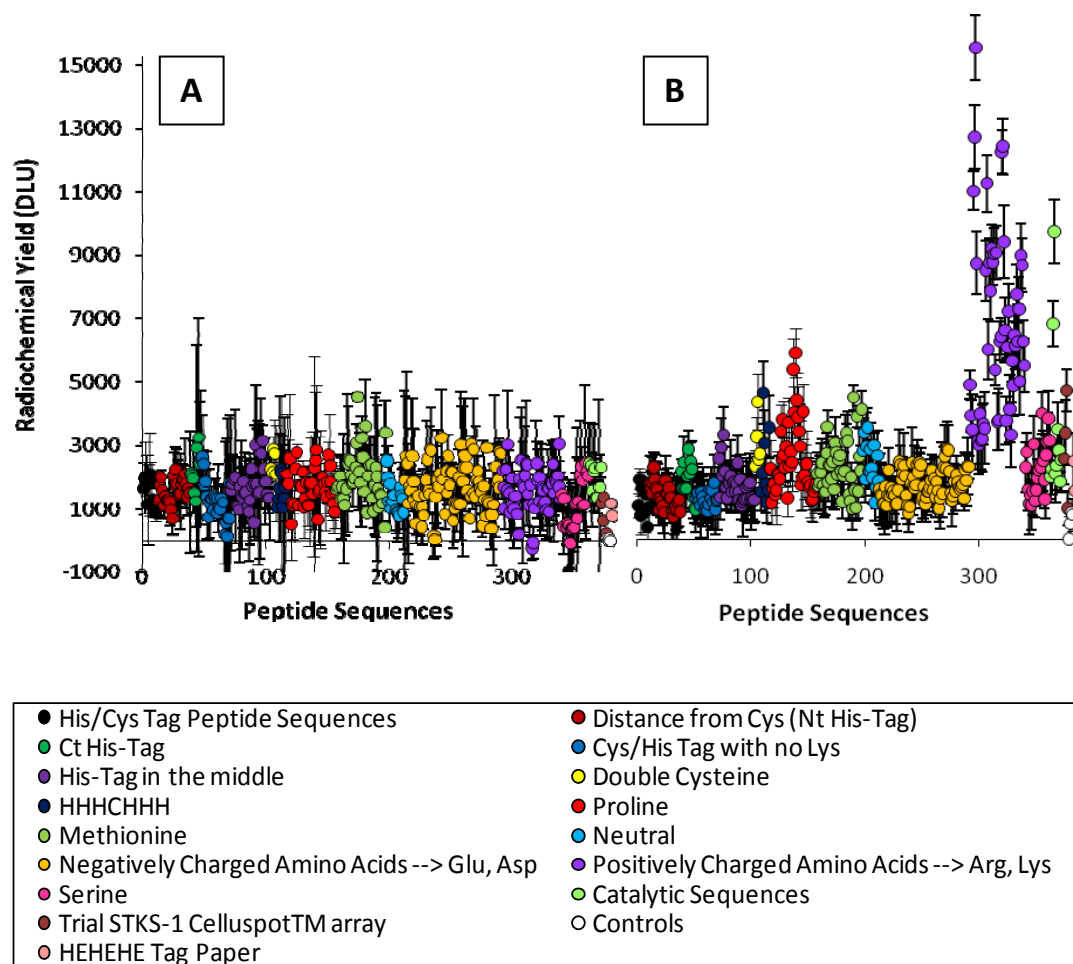

**Figure S15:** Comparison of  $[^{99m}\text{Tc}][\text{Tc}(\text{CO})_3]^+$  labeling of all sequences in tris-HCl pH 5.1 and in PBS. **A)** 120 min reaction time in citrate buffered solution at pH 5.1 and, **B)** 15 min reaction time in PBS solution. The graphs have been plotted to the same scale. Labeling is faster in PBS and dramatically more selective for positively charged sequences.

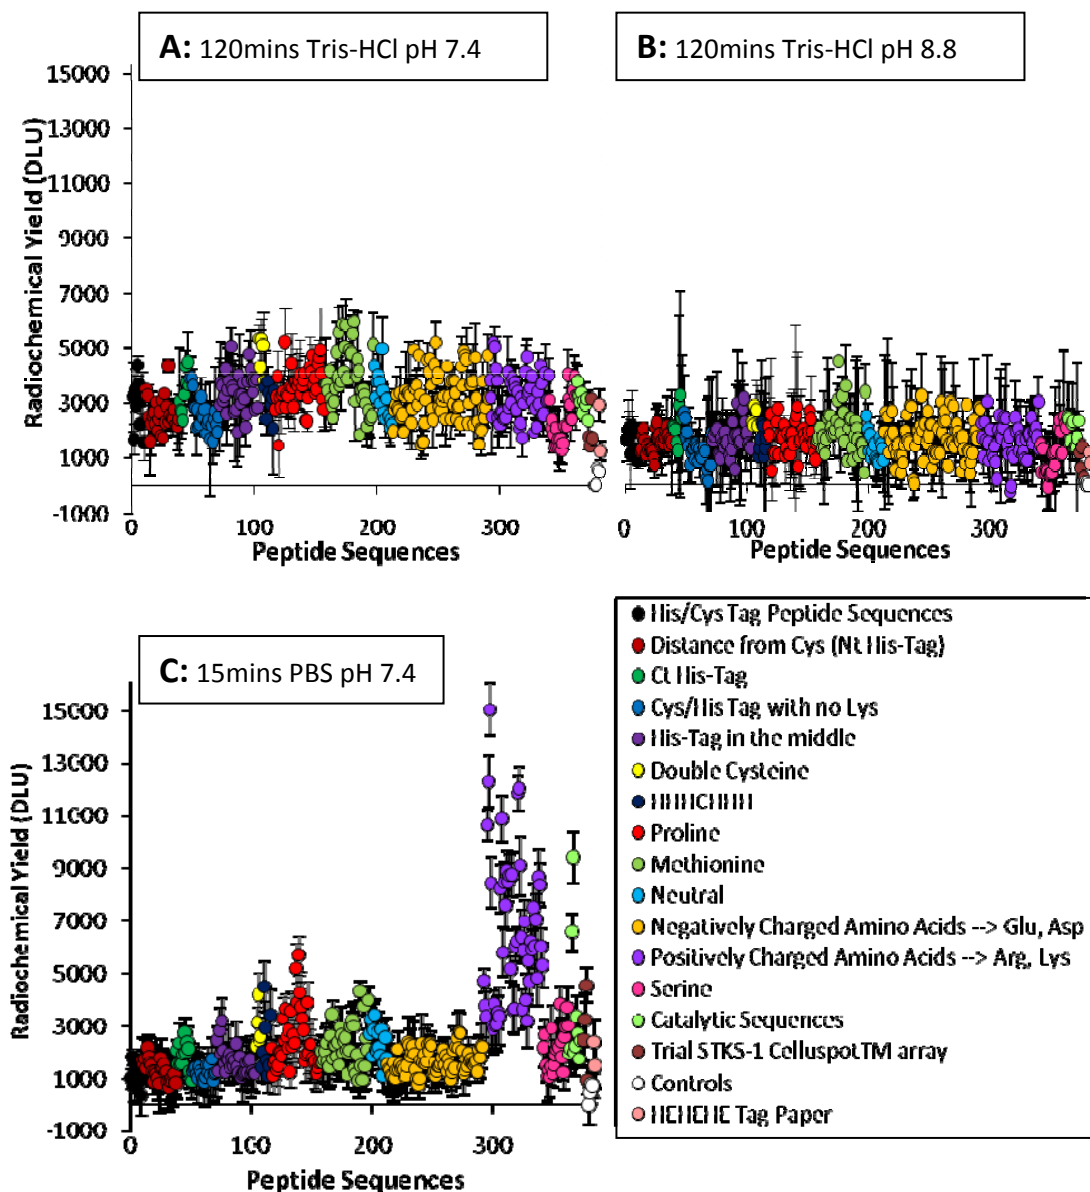

**Figure S16:** Comparisons of  $[^{99m}\text{Tc}][\text{Tc}(\text{CO})_3]^+$  labeling yields in tris-HCl buffer and PBS. **A)** After 120 min reaction time in Tris-HCl buffer, pH 7.4; **B)** After 120 min reaction time in Tris-HCl buffer, pH 8.8; **C)** After 15 min reaction time PBS. The graphs have been plotted to the same scale and the data normalized to the background values. Labeling in Tris-HCl is less efficient and less selective than in PBS.

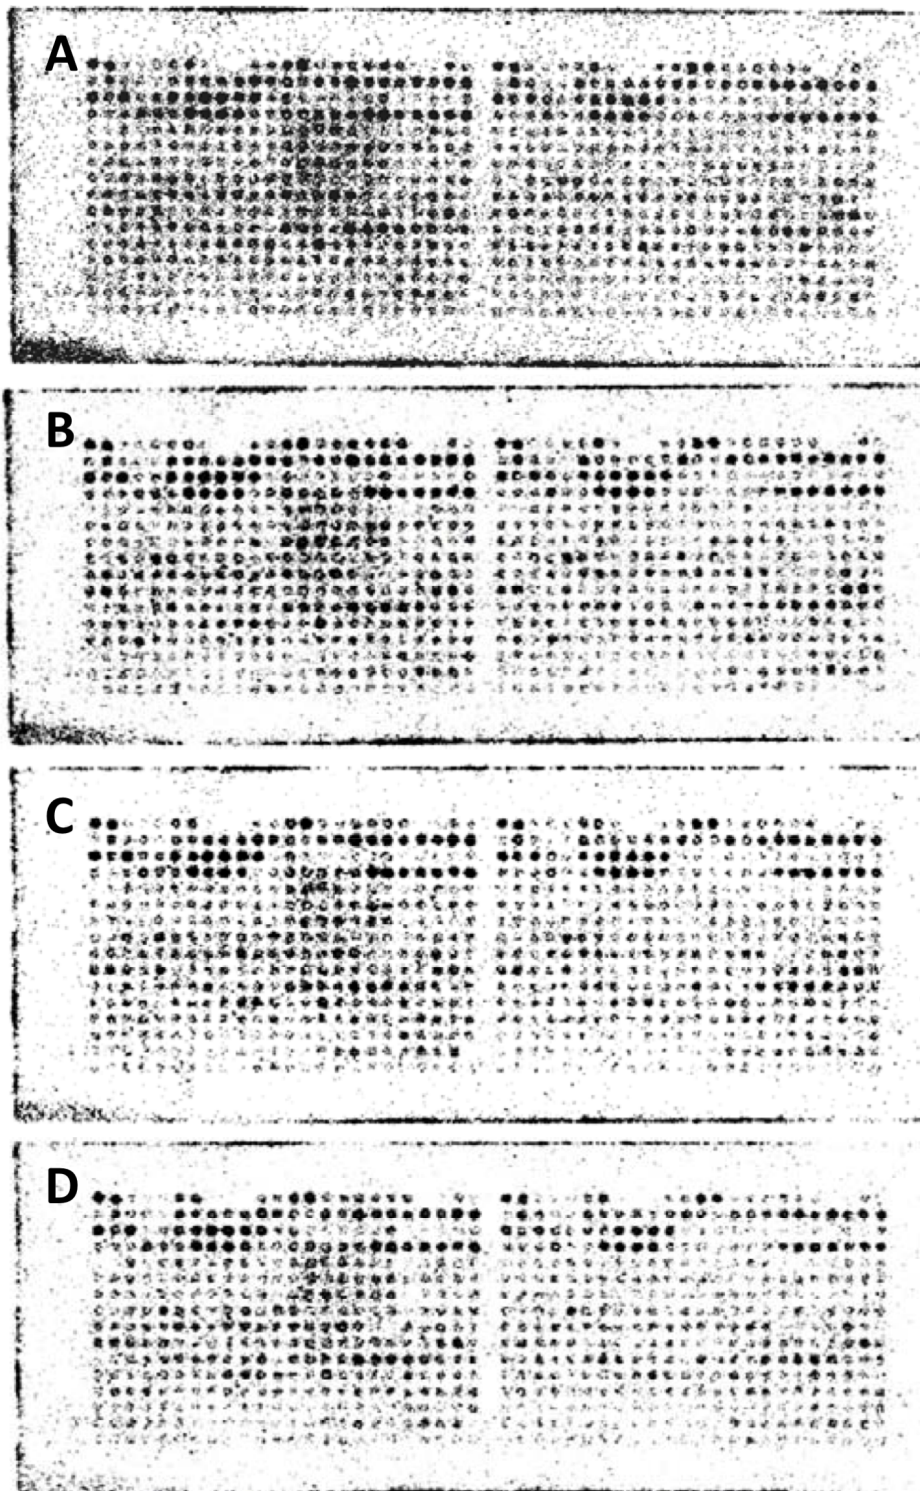

**Figure S17.** Phosphor image of the  $[^{99m}\text{Tc}][\text{Tc}(\text{CO})_3]^+$  radiolabeled His-Tagged Celluspot<sup>TM</sup> peptide array after 120 min labeling followed by incubation in PBS for up to 24 h. **A)** Image after radiolabeling for 120 min; **B)** Image after incubation of labeled array (A) in PBS buffer for 1 h; **C)** Image after incubation in PBS buffer for 2 h; **D)** Image after incubation in PBS buffer for 24 h.  $^{99m}\text{Tc}$  complexes of the peptides labeled under these conditions are stable in PBS.

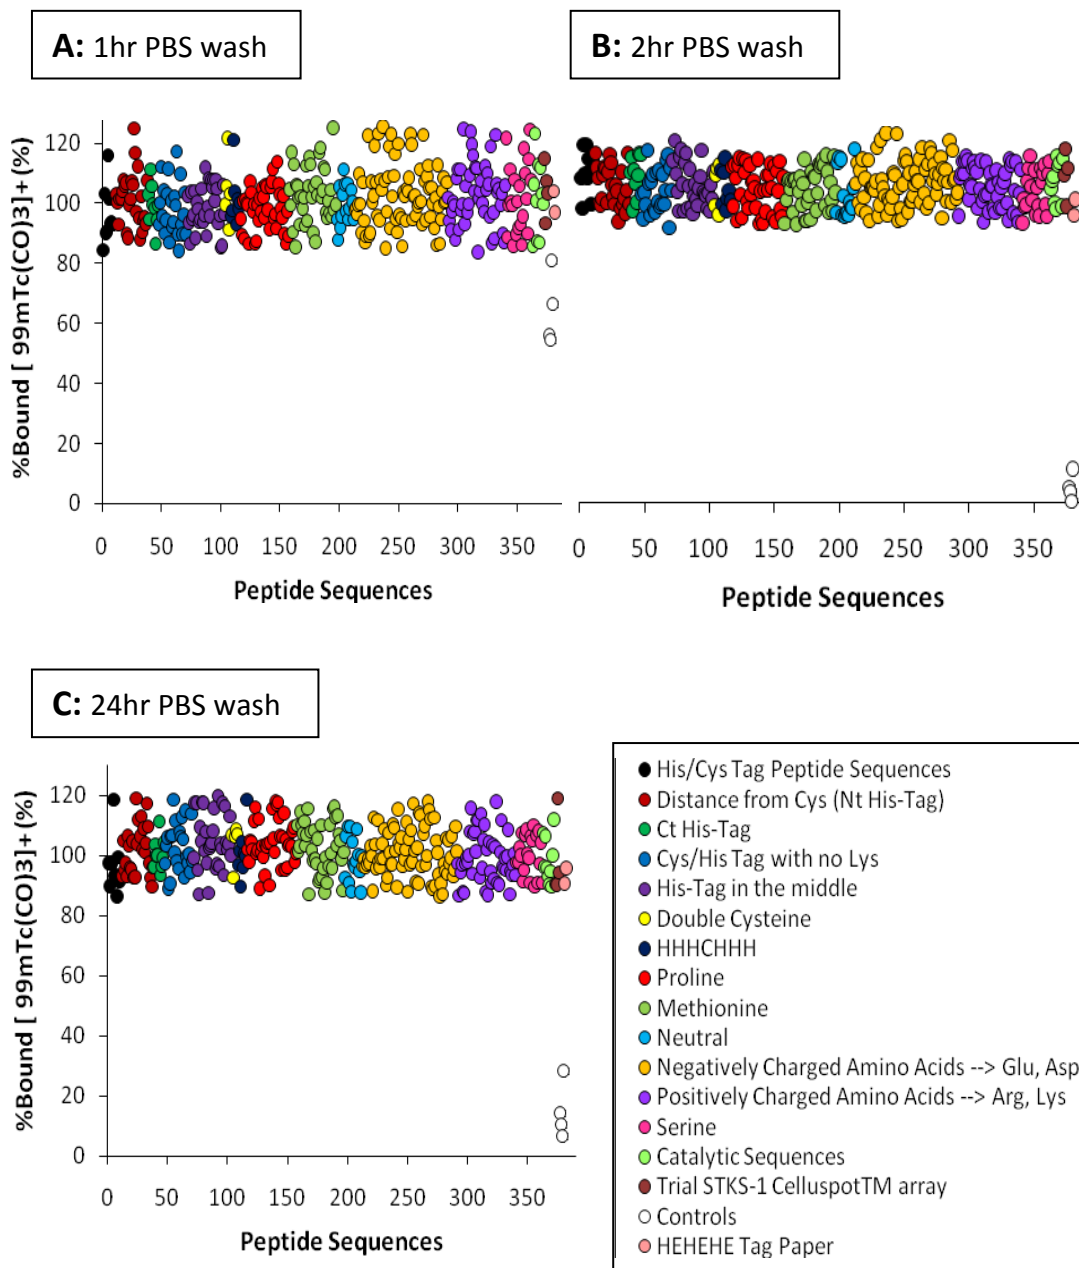

**Figure S18.** Radiolabel stability in PBS. Calculated %  $[^{99m}\text{Tc}][\text{Tc}(\text{CO})_3]^+$  remaining on all peptide sequences (labeled in PBS) after exposure to fresh non-radioactive PBS buffer for 1 h, 2 h and 24 h. The data are presented according to the categories previously established based on the characteristics of the peptide sequences. **A)** Exposure to PBS buffer for 1 h; **B)** Exposure to PBS buffer for 2 h; **C)** Exposure to PBS buffer for 24 h. The peptides in the “Controls” category (white circles), which show major loss of radiolabel, correspond to 2 spots on the array with no peptide sequences and 2 that do not contain His residues.

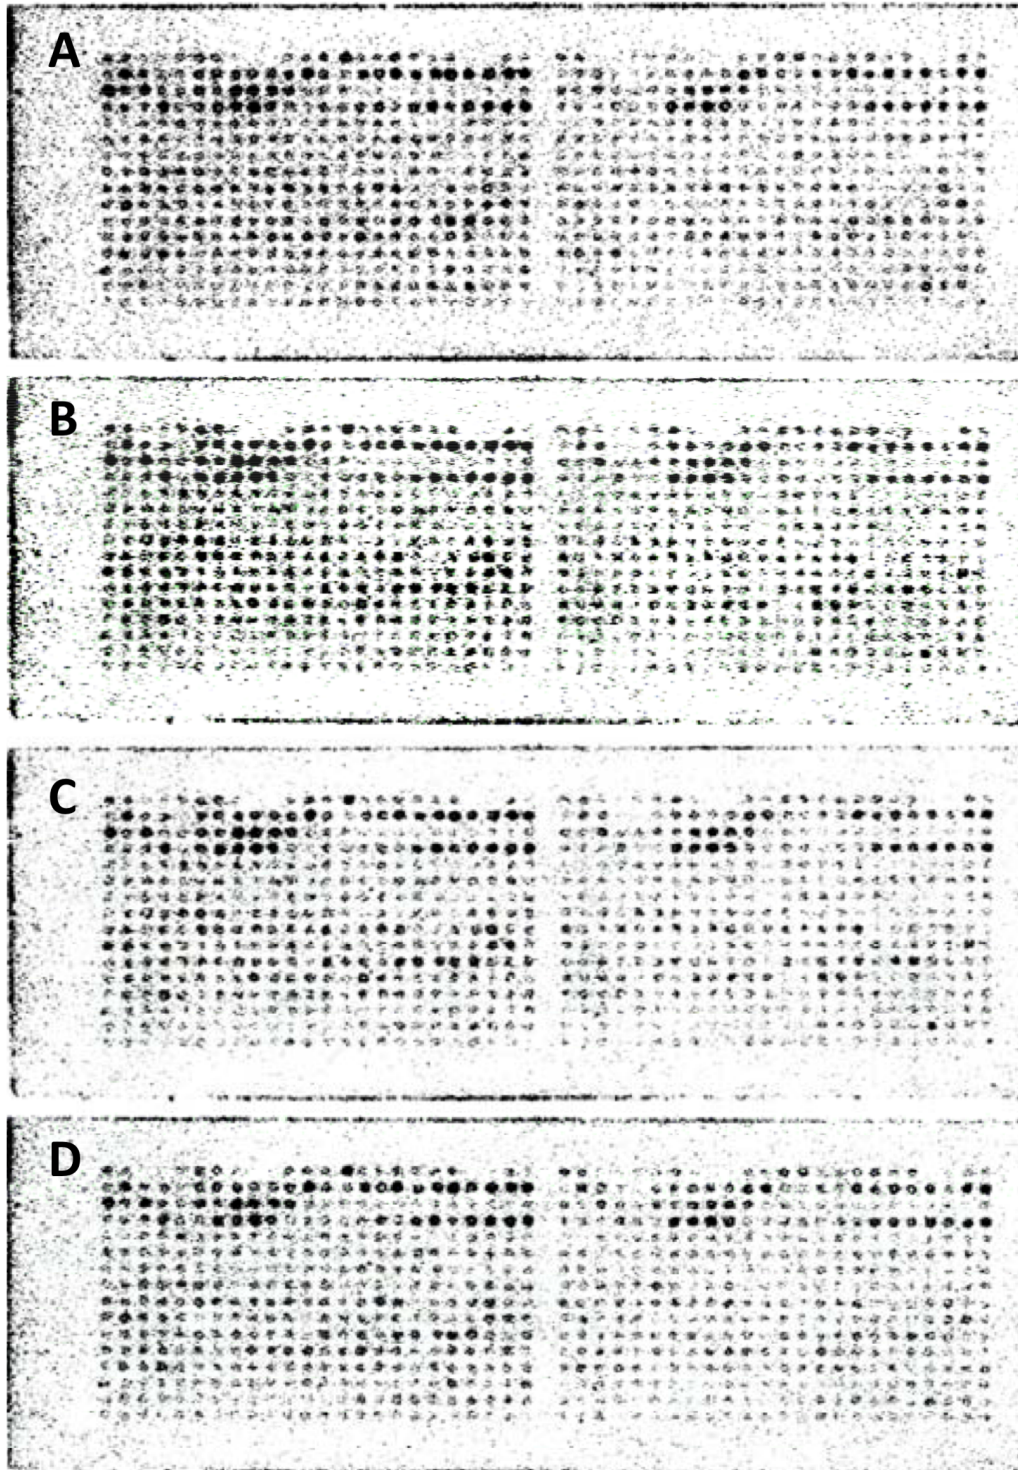

**Figure S19.** Radiolabel stability in serum. Phosphor image of the  $[^{99m}\text{Tc}][\text{Tc}(\text{CO})_3]^+$  radiolabeled His-Tagged Celluspot<sup>TM</sup> peptide array (labeled in PBS for 120 min) and after incubation in human serum for up to 24 h. **A)** Image after radiolabeling for 120 min; **B)** Image after incubation of labeled array (A) in PBS for 1 h; **C)** Image after incubation in PBS for 2 h; **D)** Image after incubation in PBS for 24h. Labeled peptides are highly stable and resistant to transchelation in serum.

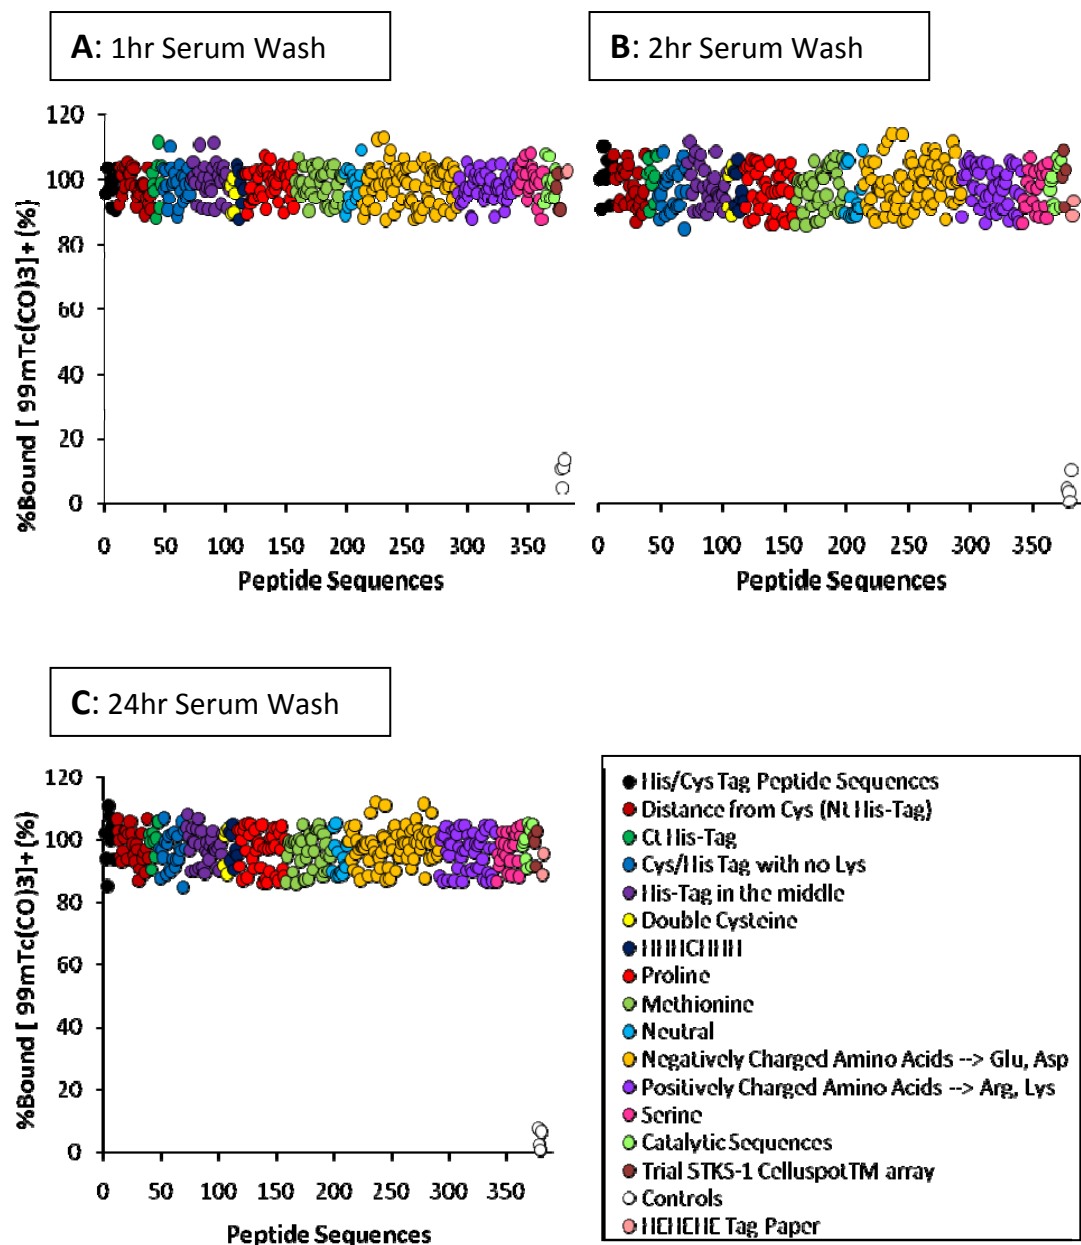

**Figure S20.** Serum stability. Calculated %  $[^{99m}\text{Tc}][\text{Tc}(\text{CO})_3]^+$  remaining on all peptide sequences (labeled in PBS for 120 min) after exposure to human serum for 1 h, 2 h and 24 h. The data are presented according to the categories previously established based on the characteristics of the peptide sequences. **A)** Exposure to human serum for 1 h; **B)** Exposure to human serum for 2 h; **C)** Exposure to human serum for 24 h. The peptides in the “Controls” category (white circles), which show major loss of radiolabel, correspond to 2 spots on the array with no peptide sequences and 2 that do not contain His residues. The labeled peptides are resistant to transchelation in serum over 24 h.



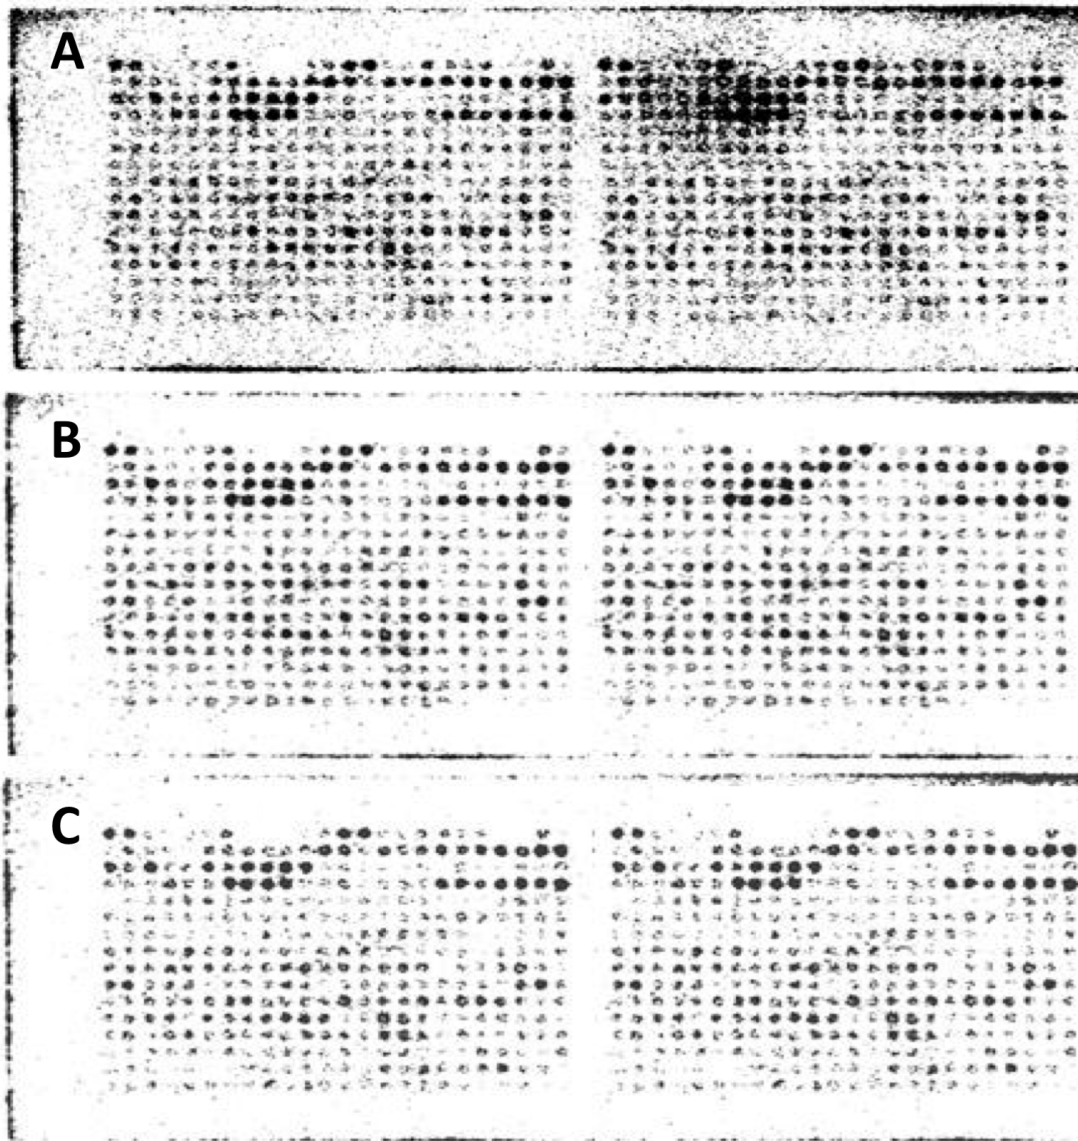

**Figure S21.** Resistance to transchelation with cysteine and histidine. Phosphor image of the  $[^{99m}\text{Tc}][\text{Tc}(\text{CO})_3]^+$  radiolabelled His-Tagged Cellspot<sup>TM</sup> peptide array (labeled for 120 min) followed by incubation in large excess of Cys and His containing solutions for 3 h consecutively. **A)** Image after radiolabeling for 120 min; **B)** Image after incubation of labeled array (A) in an excess Cys solution; and **C)** Image after incubation of Cys-treated array (B) in an excess His solution.

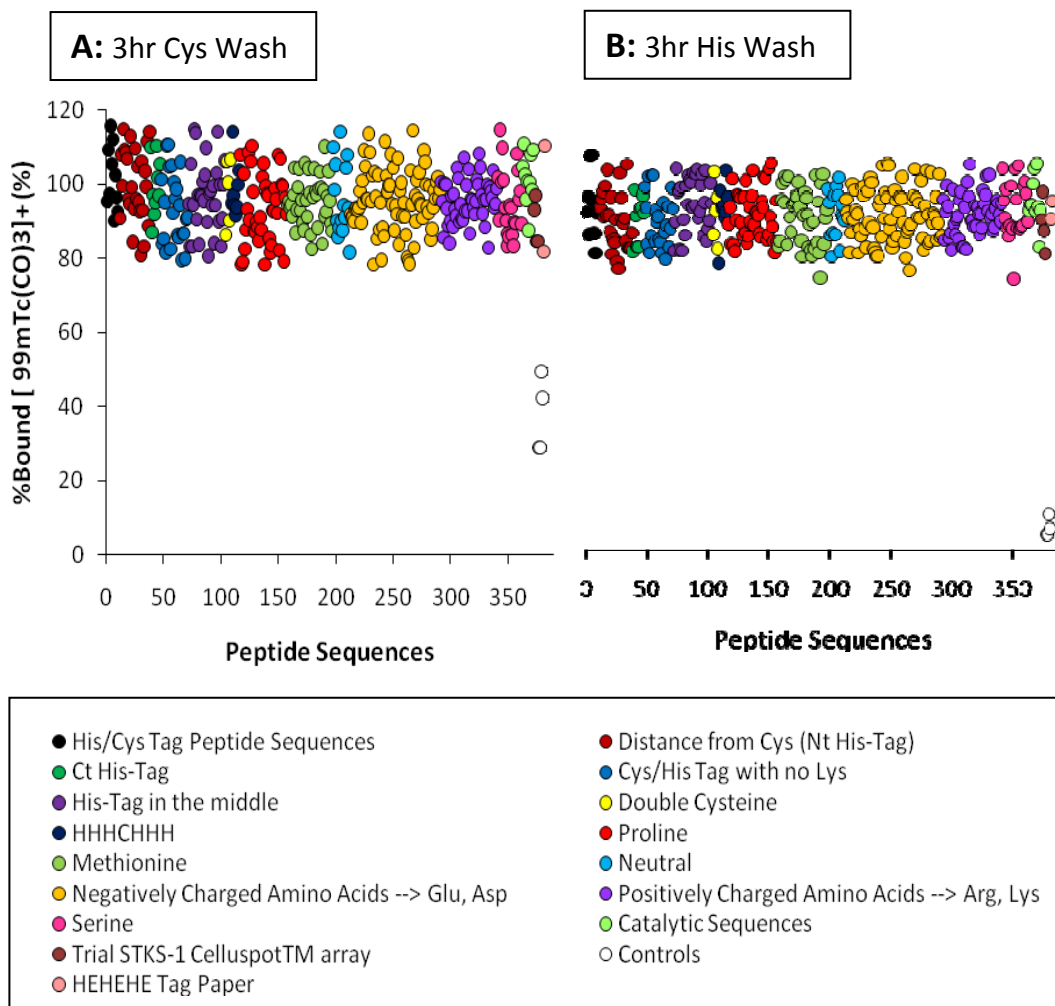

**Figure S22.** Resistance to transchelation with cysteine and histidine. Calculated % [ $^{99m}\text{Tc}$ ][ $\text{Tc}(\text{CO})_3$ ] $^+$  remaining bound to all labeled (in PBS for 120 min) peptide sequences after exposure to excess Cys and His solutions for 3 h each consecutively. **A)** Exposure to a Cys rich solution for 3 h. **B)** Exposure to His rich solution for 3 h. Labeled peptides are highly resistant to transchelation with cysteine and histidine.

$[^{188}\text{Re}(\text{CO})_3]^+$  Labelling

$[^{99\text{m}}\text{Tc}(\text{CO})_3]^+$  Labelling

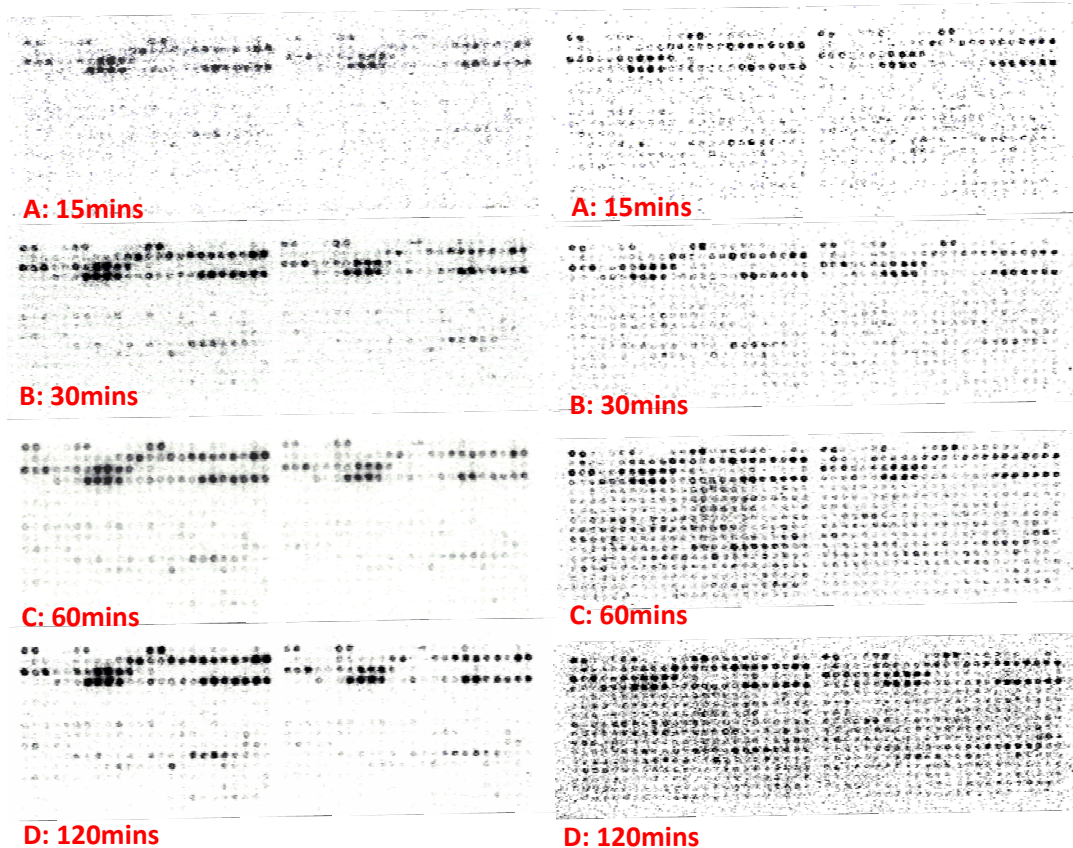

**Figure S23:** Comparison of phosphor images of the  $[^{188}\text{Re}(\text{CO})_3]^+$  (left) and  $[^{99\text{m}}\text{Tc}(\text{CO})_3]^+$  (right) labeling of the His-tagged Celluspot<sup>TM</sup> peptide arrays. A) Image after 15 min total incubation time, B) Image after 30 min total incubation time, C) Image after 60 min total incubation time and D) Image after 120 min total incubation time. Despite the poorer resolution of the  $^{188}\text{Re}$  images, the analogy between the two radionuclides in selectivity among the spots is evident.

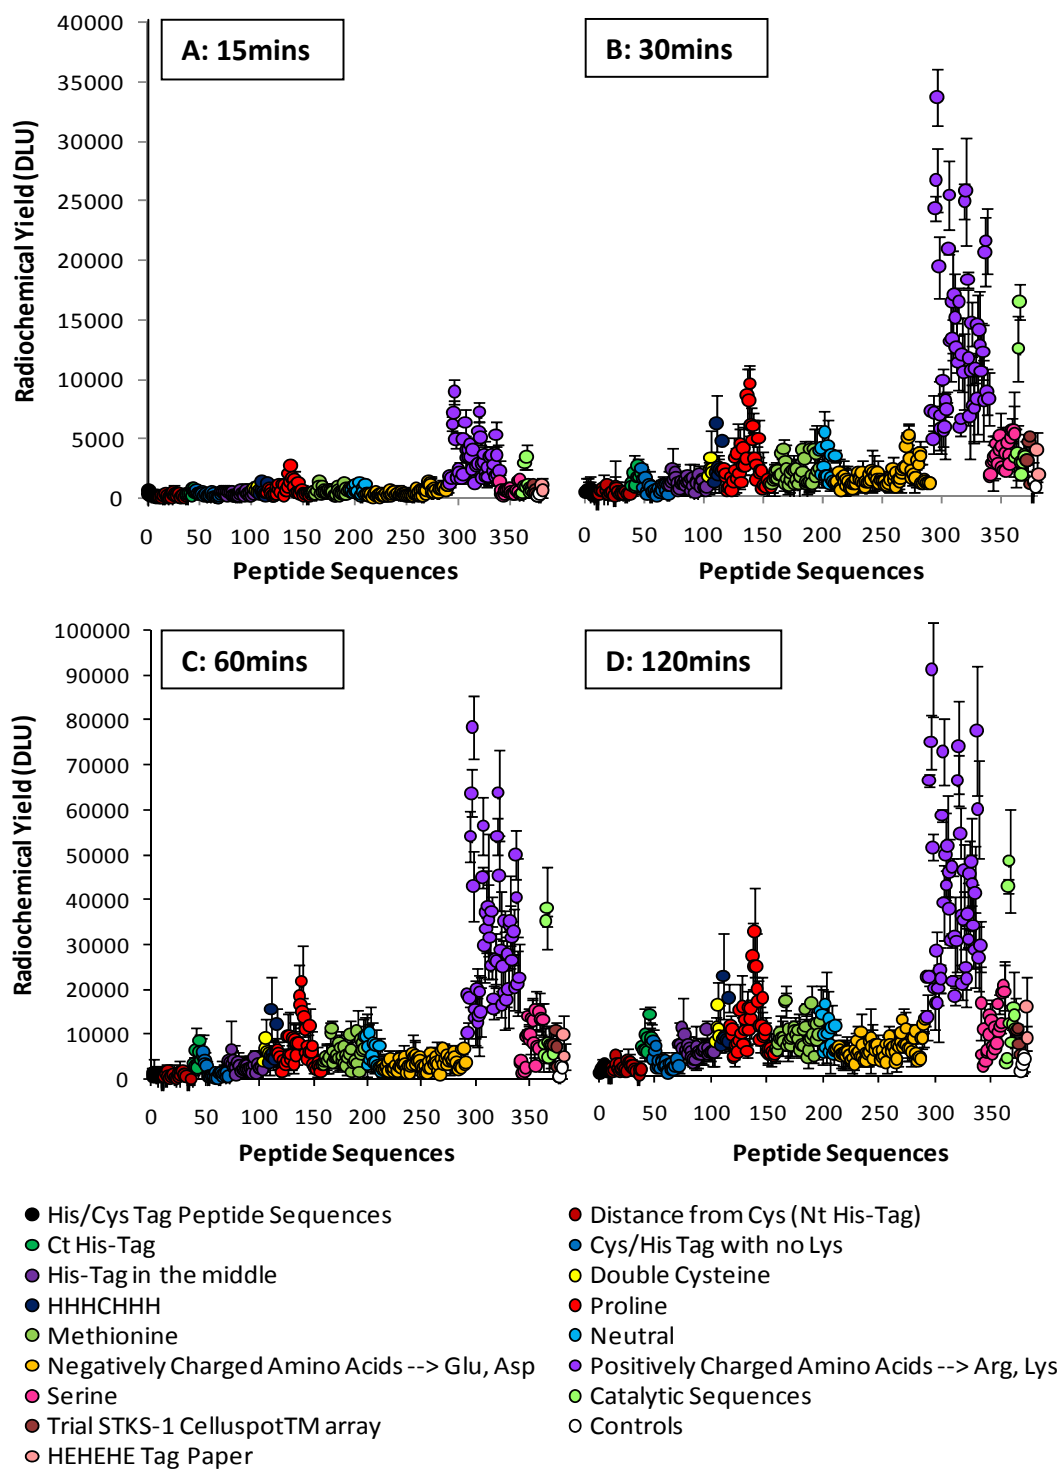

**Figure S24:** Rhenium-188 labelling. Radiochemical yield of all 384 peptides on the His-Tagged Celluspot™ peptide array post radiolabelling with  $[^{188}\text{Re}(\text{CO})_3]^+$  in PBS at pH 7.4. Results and standard deviations are calculated based on 2 sets of data. The sequence categories are listed in the legend and a description is provided above. **A)** after 15 min incubation, **B)** after 30 min incubation, **C)** after 60 min incubation and **D)** after 120 min incubation. The similarity of the profiles in this figure with those of the  $^{99\text{m}}\text{Tc}$  analogs shown in Fig. S5 is striking.

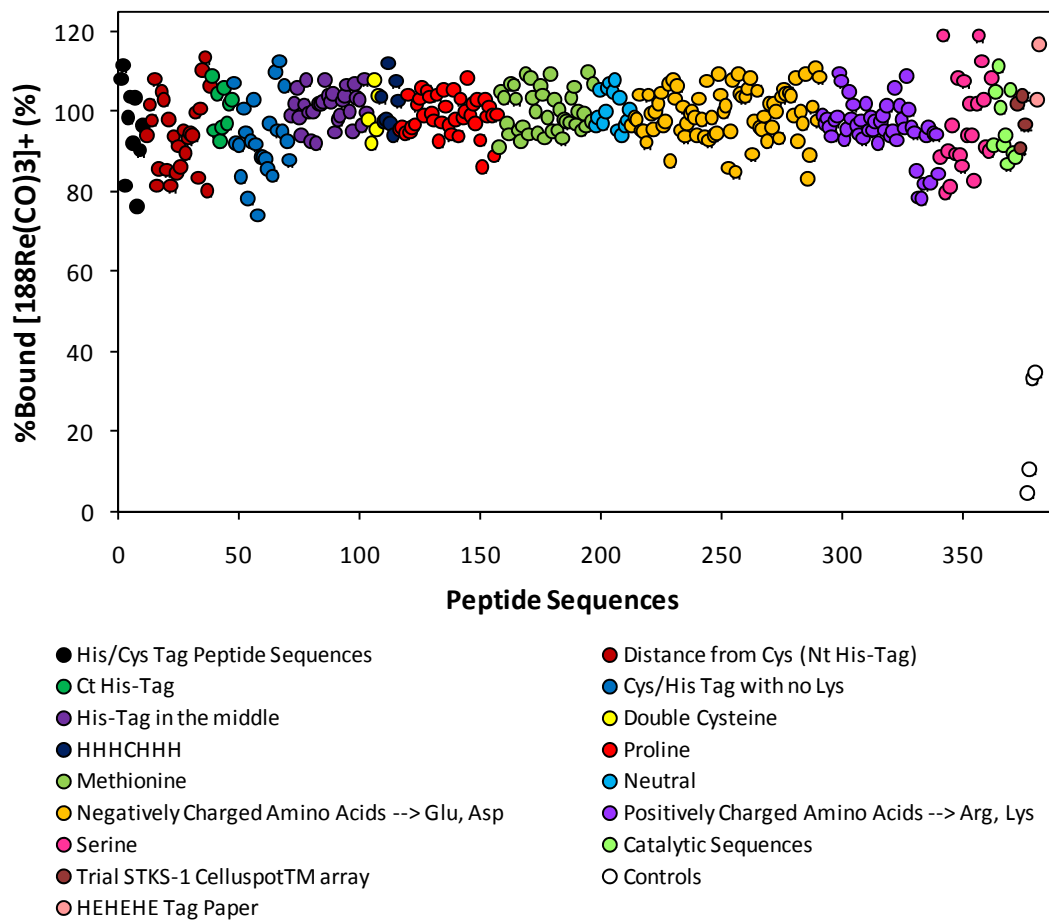

**Figure S25.** Serum stability of  $^{188}\text{Re}$ -labeled peptides: the % of  $^{188}\text{Re}$  bound to each spot in the array after labeling with  $[^{188}\text{Re}(\text{CO})_3]^+$  in PBS that remained after exposure to human serum for 48 h is shown. The attachment of  $^{188}\text{Re}$  to the peptides is highly resistant to transchelation in serum, as is the case for the  $^{99\text{m}}\text{Tc}$  analogs.

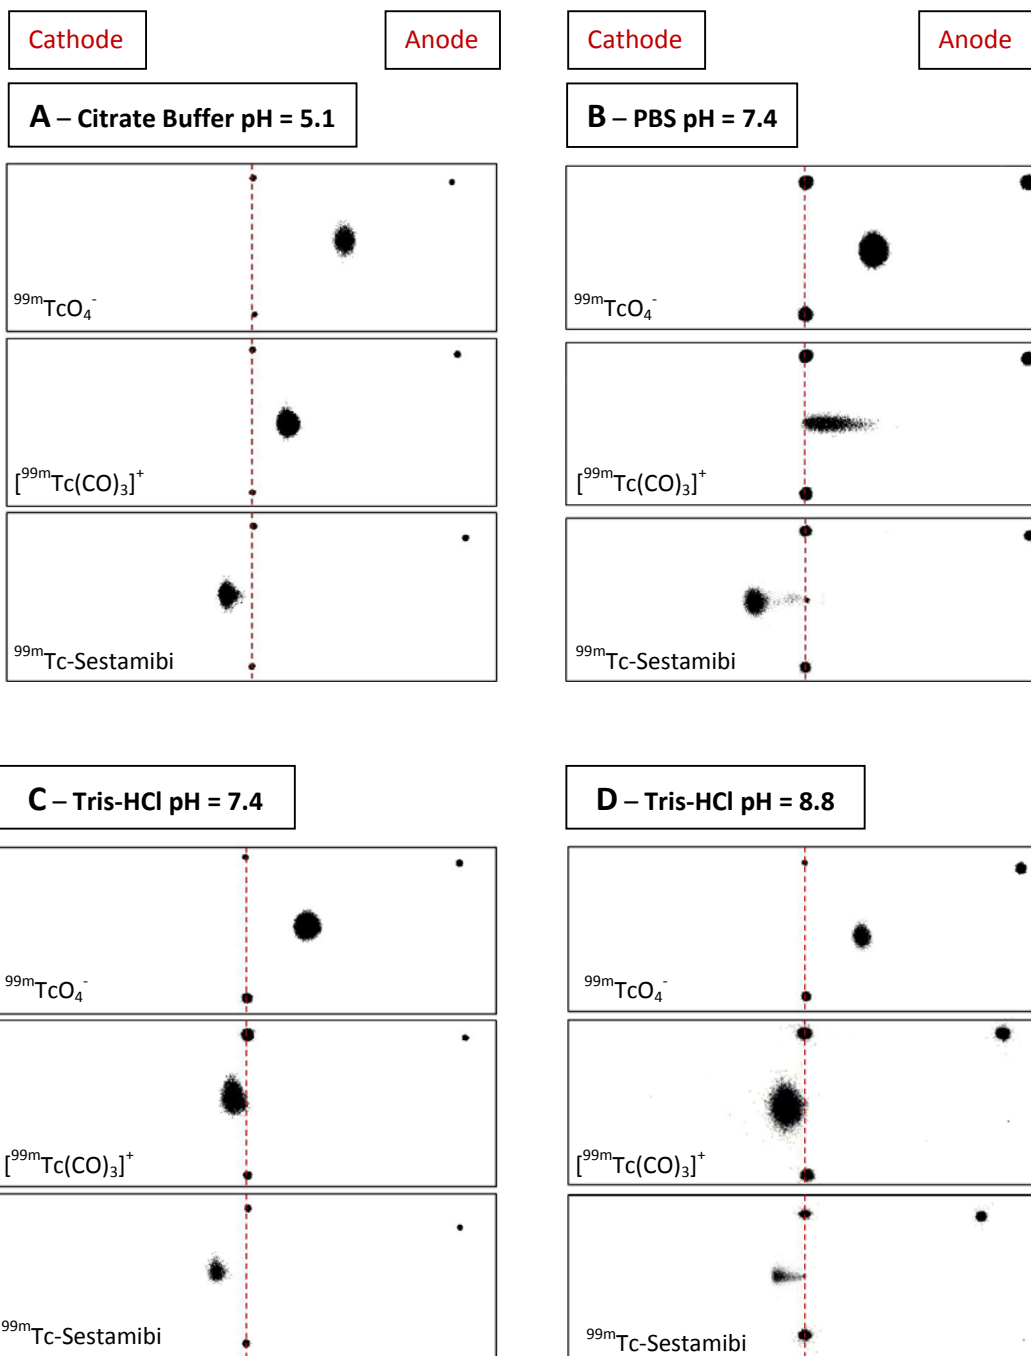

**Figure S26.** Images obtained from the electrophoresis of  $[\text{}^{99m}\text{Tc}][\text{TcO}_4]^-$ ,  $^{99m}\text{Tc-Sestamibi}$  and  $[\text{}^{99m}\text{Tc}][\text{Tc}(\text{CO})_3]^+$  in various buffers after 1 h (4 mA current). The two black spots joined by a vertical red dashed line represent the starting point of the radioactive complexes before application of the electrical field and the black spot in the top right hand corner indicates the position of the anode during the experiment. Electrophoresis was performed in different buffers: **A)** Citrate buffer at pH 5.1, **B)** PBS at pH 7.4, **C)** Tris-HCl buffer at pH 7.4 and **D)** Tris-HCl buffer at pH 8.8. While  $[\text{}^{99m}\text{Tc}][\text{TcO}_4]^-$  and  $^{99m}\text{Tc-Sestamibi}$  in all media behaved as expected as an anion and a cation, respectively, the “ $[\text{}^{99m}\text{Tc}][\text{Tc}(\text{CO})_3]^+$ ” unexpectedly behaved as an anion in PBS and citrate buffer.

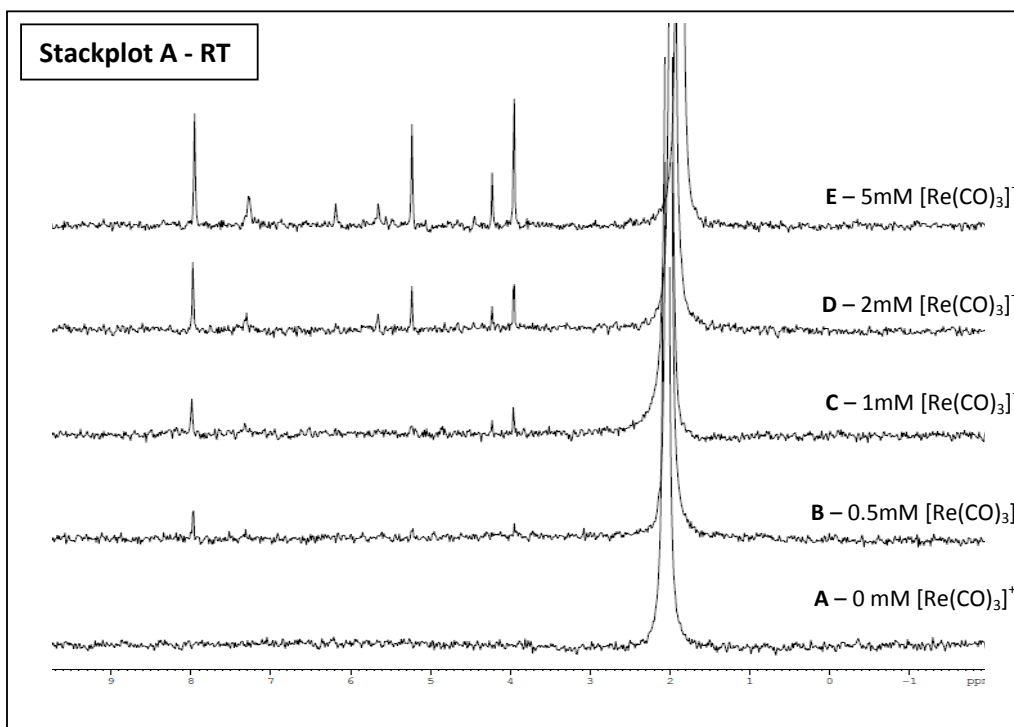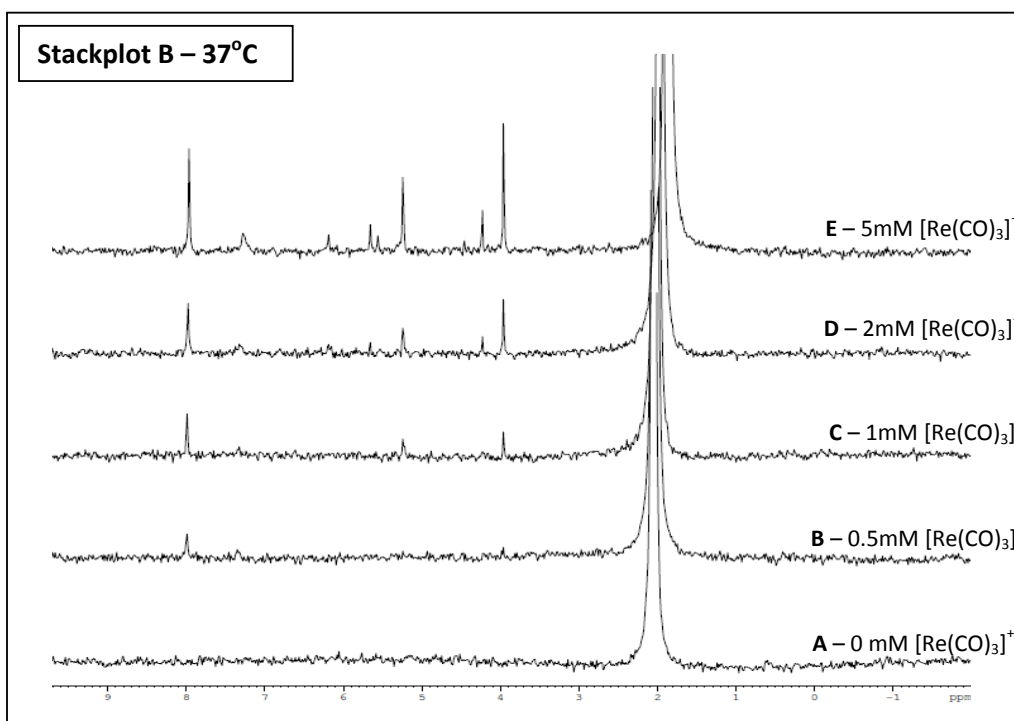

**Figure S27.**  $^{31}\text{P}$  NMR spectra of increasing concentrations of  $[\text{Re}(\text{CO})_3]^+$  in a 100 mM phosphate buffered solution at pH 7.4. **Stackplot A)** Spectra obtained after incubation for 30 min at RT. **Stackplot B)** Spectra obtained after 30 min incubation at 37°C. New species, most likely due to coordination of phosphate to Re, are formed when  $[\text{Re}(\text{CO})_3]^+$  and phosphate are combined; there is little difference in their rate of formation at room temperature and 37°C.

## Expression and purification of model proteins

All scFv fragments were successfully constructed, expressed and purified. The sequence of each was confirmed by DNA sequencing. The “labeling sequences” were defined as the 13 amino acids at the C-terminal of the protein which includes the His<sub>6</sub>-tag and 7 of its surrounding amino acid residues. A His<sub>6</sub>-tag in combination with multiple Arg residues was successfully incorporated as the labeling sequence at the C-terminus of J591scFvJWT.

The control proteins were chosen due to the minimal number of Arg residues at the C-terminal in close proximity to the His<sub>6</sub>-tag. Apart from the labeling sequence, the J591scFv protein has an identical amino acid composition to the J591scFvJWT fragment. Its labeling sequence, KRAAALEHHHHH, with a pI of 8.79, contains 1 Arg and 1 Lys residue 6 and 7 amino acids away, respectively, from the His<sub>6</sub>-tag. To analyze the effect of this Arg on labeling, an additional version of the J591scFv was used for comparison, humanized (hu) J591scFv, with a labeling sequence not containing the Arg. The huJ591scFvscFv labeling sequence, IKLAAALEHHHHH, has a pI of 7.21. The Lys 7 amino acids away from the His<sub>6</sub>-tag is still present. 6C7.1scFv and 6C7.1-CscFv have identical amino acid composition other than an additional Cys residue at the C-terminus of the His-tag in the 6C7.1-CscFvscFv. The labeling sequences for 6C7.1scFv and 6C7.1-CscFv are PTAAALEHHHHH and TAAALEHHHHHC respectively and the pI is 6.53 for both.

The J591scFvJWT non-reduced and reduced samples revealed a single band representing the J591scFvJWT monomer at 28 KDa (Fig. S28). This implies that the protein folding has not been compromised and a homogenous J591scFvJWT protein has been formed. As a result of the successful expression, J591scFvJWT was reproduced and purified in parallel with the J591scFv control protein for further comparative studies including radiolabeling efficiencies and binding to PSMA.

The large scale production of J591scFvJWT and J591scFv produced 2 mg/L and 7 mg/L respectively of the purified proteins. The results suggest that the JWT Tag influences the expression of the J591scFv protein resulting in smaller yields of the protein. Production and purification steps were monitored by SDS PAGE and Western blotting and are displayed in Figs. S28 and S29 for the J591scFvJWT and J591scFv respectively. The J591scFvJWT appears as a monomer of 28 KDa. Lanes A-C in the SDS-PAGE monitor the progress of extracting J591scFvJWT from the culture supernatant. His<sub>6</sub> recombinant proteins such as J591scFvJWT have a high affinity and selectivity for the Ni-NTA and as a result, the majority of protein impurities present in the supernatant, lane A, are discarded in the flowthrough of the Ni-NTA purification system. Other impurities from the culture media non-specifically bound to the NiNTA are removed with addition of the Ni-NTA washing buffer containing 35 mM imidazole, lane B. J591scFvJWT was eluted from the column by competition with a 250 mM imidazole solution in the Ni-NTA elution buffer, lane C.

Three peaks appeared in the SEC purification step of the J591scFvJWT and samples from each were loaded onto the SDS PAGE and can be seen in lanes D-F. The first peak corresponded to serum proteins from culture media, row D, whilst the second peak corresponded to dimeric aggregates of J591scFvJWT protein, row E. The dimeric aggregates formed were non-covalent dimers and on the SDS-PAGE appear as single monomers at 28 KDa due to the SDS procedure disrupting the secondary and tertiary structures of the protein. J591scFvJWT was eluted as a



purified protein in the third peak, lane F, and concentrated to 1.3 mg/ml, lane G. The corresponding western blot confirms the appearance of the J591scFvJWT as a single band at 28 KDa on the SDS-PAGE. The primary antibody used in the western blot, antiPentaHis, specifically detects the (His)<sub>6</sub> tag.

SEC HPLC analysis confirms that for J591scFvJWT, the protein exists as a monomer, retention time 9:10-9:30 min, with only small amounts of scFv dimers present (Fig. S30). J591scFv and huJ591scFv show a higher degree of dimer formation.

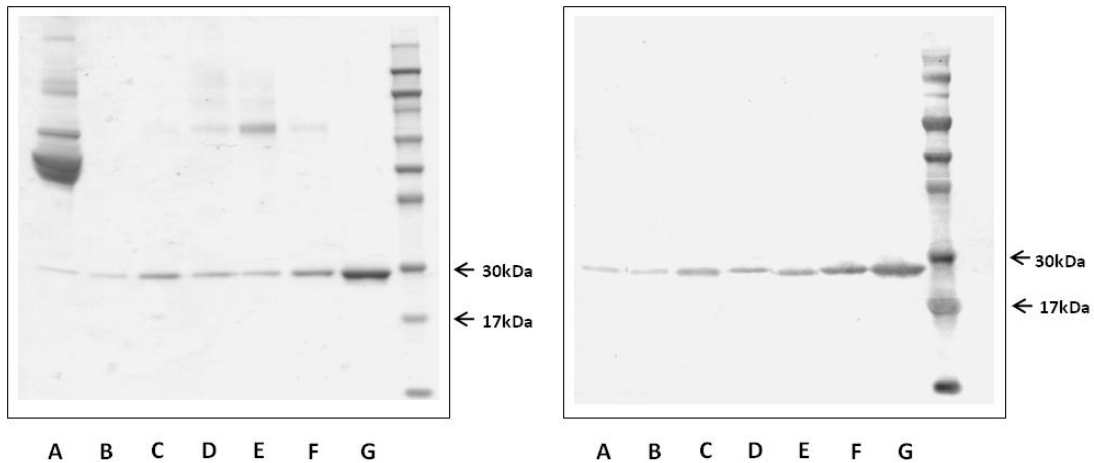

| Row | Sample                                                            |
|-----|-------------------------------------------------------------------|
| A   | Culture Supernatant                                               |
| B   | 35mM imidazole wash of the NiNTA column                           |
| C   | J591scFvJWT elution from NiNTA column (250 mM imidazole)          |
| D   | SEC Purification: Fraction 1 – BSA Protein                        |
| E   | SEC Purification: Fraction 2 – Non-covalent dimers of J591scFvJWT |
| F   | SEC Purification: Fraction 3 – Purified monomeric J591scFvJWT     |
| G   | Concentrated J591scFvJWT – 1.3 mg/ml                              |

**Figure S28.** SDS-PAGE and Western Blot of the extraction and purification process of the J591scFvJWT protein from the culture supernatant. **Left:** SDS-PAGE with lanes from A-G. **Right:** Western blot of the SDS-PAGE with lanes from A-G. J591scFvJWT sample runs as a single band corresponding to the size of the monomer, 28 KDa.

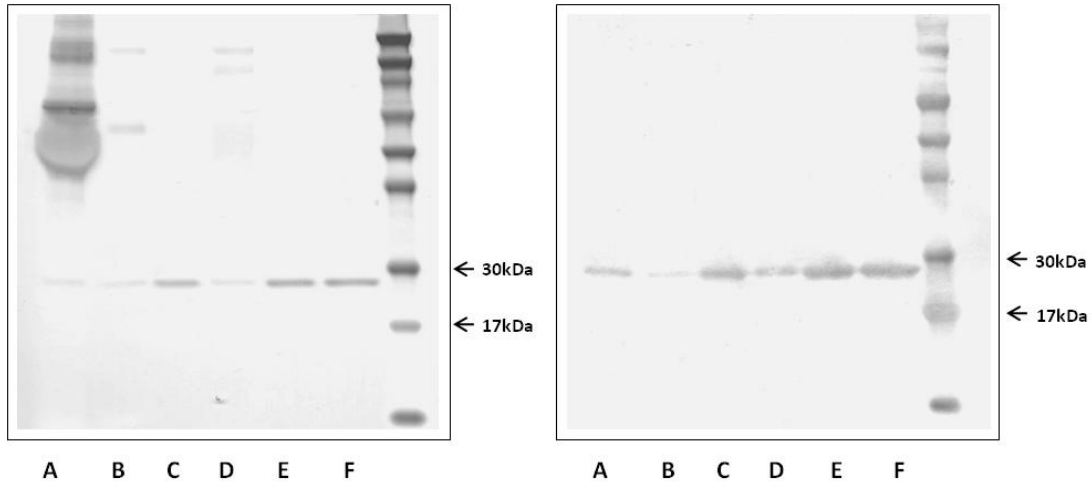

| Row | Sample                                                         |
|-----|----------------------------------------------------------------|
| A   | Culture Supernatant                                            |
| B   | 35 mM imidazole wash of the NiNTA column                       |
| C   | J591scFv elution from NiNTA column (250 mM imidazole)          |
| D   | SEC Purification: Fraction 1 – BSA Protein                     |
| E   | SEC Purification: Fraction 2 – Non-covalent dimers of J591scFv |
| F   | SEC Purification: Fraction 3 – Purified monomeric J591scFv     |

**Figure S29.** SDS-PAGE and Western blot of the extraction and purification process of the J591scFv protein from the culture supernatant. **Left:** SDS-PAGE with lanes from A-F. **Right:** Western blot of the SDS-PAGE with lanes from A-F. J591scFv sample runs as a single band corresponding to the size of the monomer, 27 KDa.

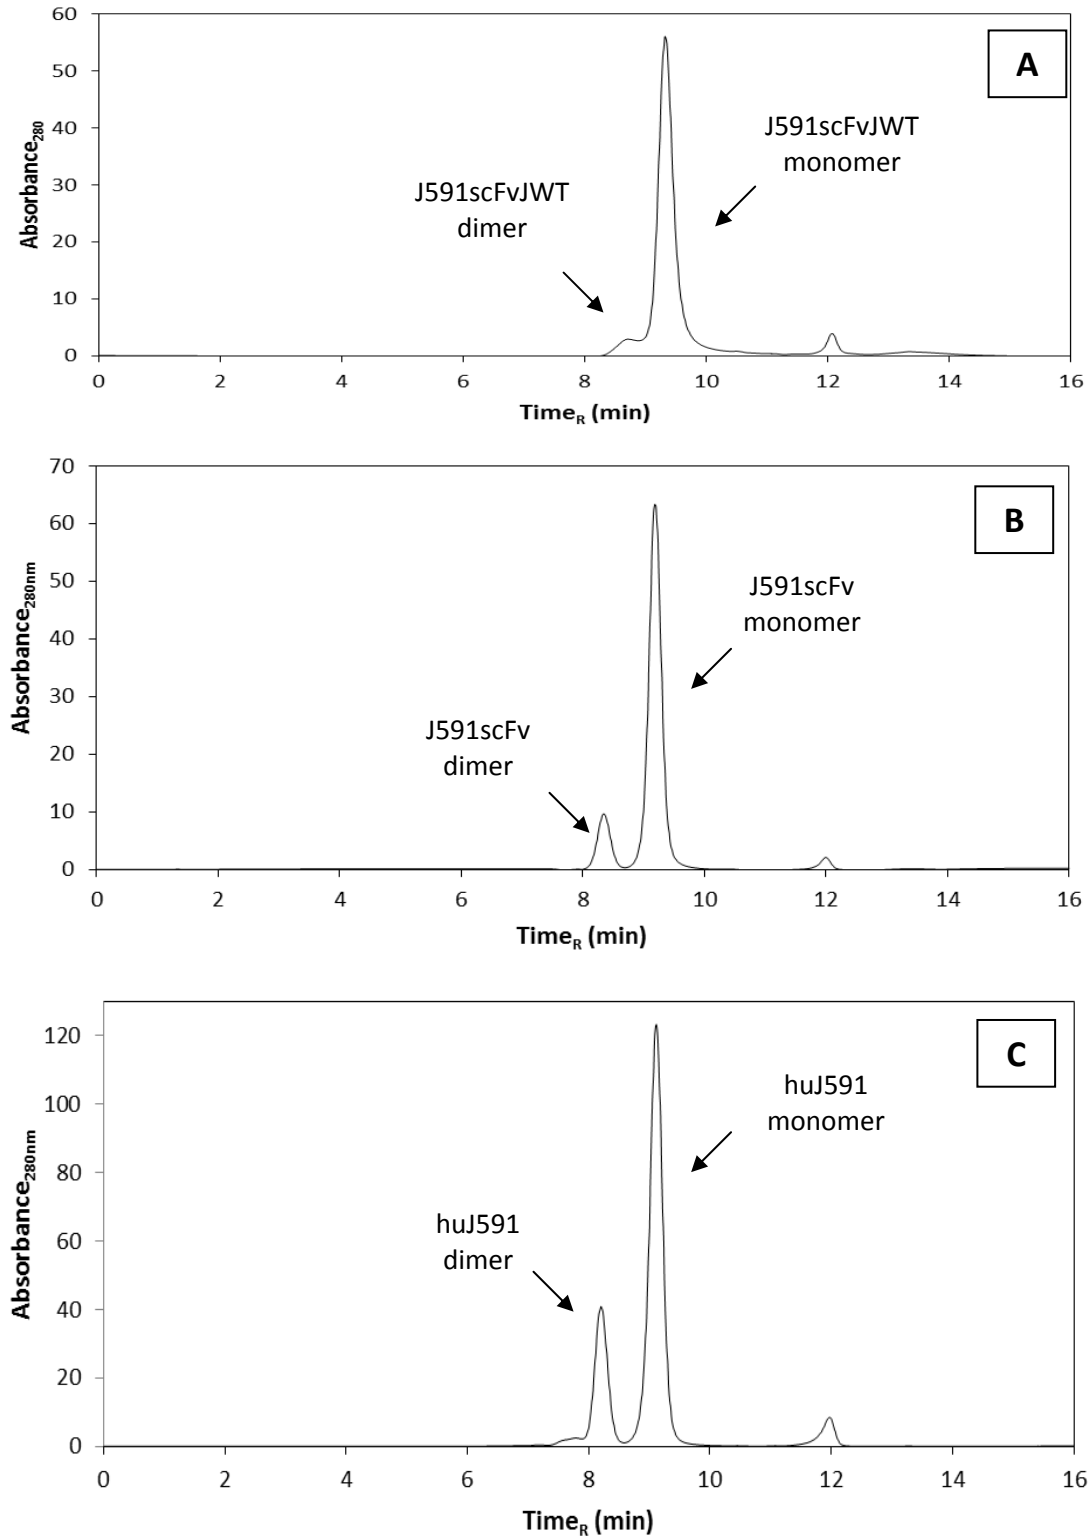

**Figure S30.** HPLC SEC analysis of the scFv proteins shows elution primarily as a single monomeric species in the region of 9:10 - 9:30 min. The peak in the region between 8:15-8:30 min represents the non-covalent dimers of the scFv protein. **A)** J591scFvJWT protein; **B)** J591scFv protein; **C)** huJ591scFv protein.

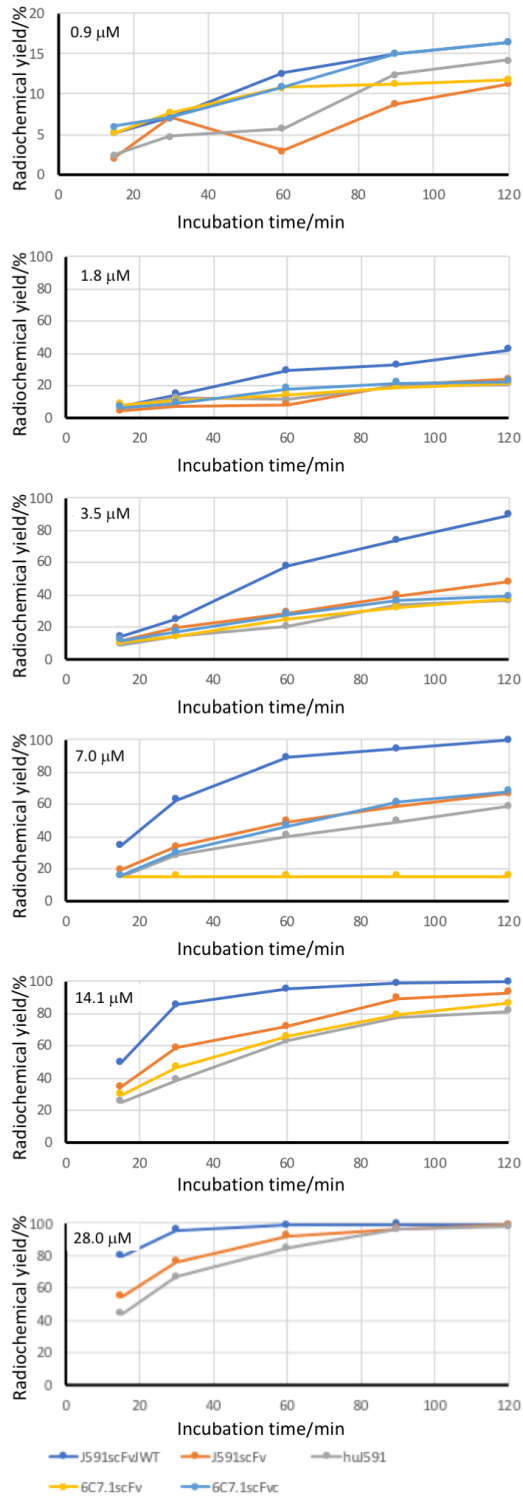

**Figure S31.** Labeling efficiency of five His-tagged proteins with  $[^{99m}\text{Tc}][\text{Tc}(\text{CO})_3]^+$  in PBS during 120 min at 37°C, at protein concentrations from 0.9 to 28 mM. Only J591scFvJWT (top) contains an optimized His-tag. There are no data for the highest and the highest two concentrations respectively of 6C7.1scFv and 6C7.1scFvc because restricted quantities were available.

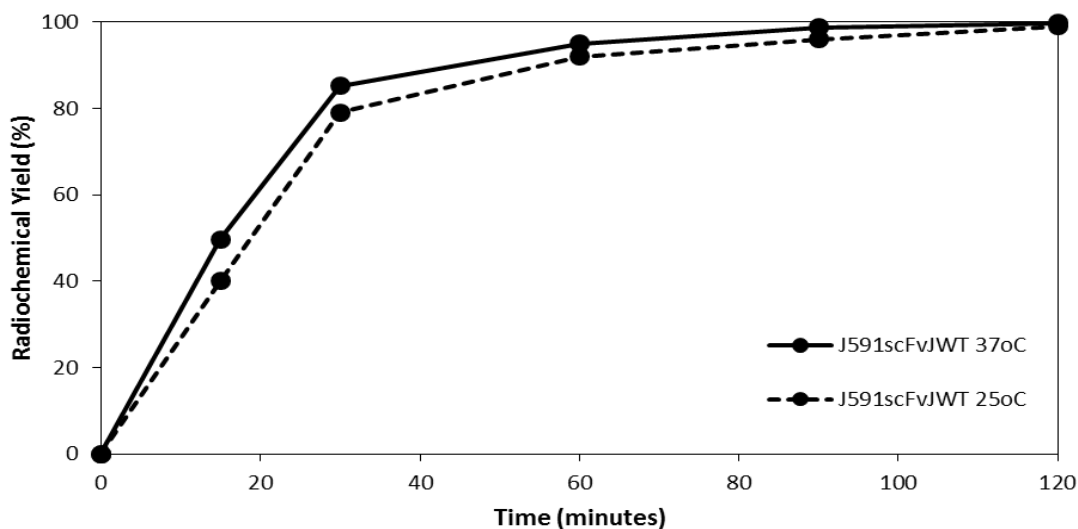

**Figure S32.** Comparison of  $[^{99m}\text{Tc}][\text{Tc}(\text{CO})_3]^+$  radiolabeling efficiency of J591scFvJWT at 37°C and 25°C in PBS. The protein concentration for both experiments was 14.1  $\mu\text{M}$ .

**Table S6.** Protein concentrations and incubation times at which scFv proteins demonstrated a radiochemical yield greater than or equal to 95%. Only the proteins and radiochemical yield achieved that were greater than 95% have been included in the table.

|               | 15min | 30min                | 60min                | 90min                                                            | 120min                                                            |
|---------------|-------|----------------------|----------------------|------------------------------------------------------------------|-------------------------------------------------------------------|
| <b>28.2uM</b> |       | J591scFvJWT<br>= 96% | J591scFvJWT<br>= 99% | J591scFvJWT<br>= 99%<br>J591scFv<br>= 97%<br>huJ591scFv<br>= 96% | J591scFvJWT<br>= 100%<br>J591scFv<br>= 99%<br>huJ591scFv<br>= 98% |
| <b>14.1uM</b> |       |                      | J591scFvJWT<br>= 95% | J591scFvJWT<br>= 98%                                             | J591scFvJWT<br>= 99%                                              |
| <b>7uM</b>    |       |                      |                      | J591scFvJWT<br>= 95%                                             | J591scFvJWT<br>= 99%                                              |
| <b>3.5uM</b>  |       |                      |                      |                                                                  |                                                                   |
| <b>1.76uM</b> |       |                      |                      |                                                                  |                                                                   |
| <b>0.88uM</b> |       |                      |                      |                                                                  |                                                                   |

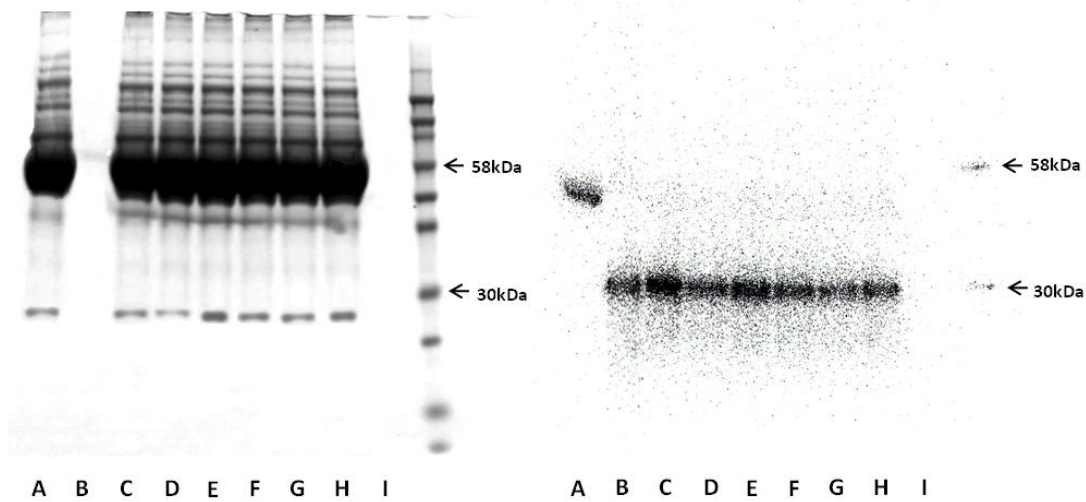

A = Serum Proteins +  $[^{99m}\text{Tc}(\text{CO})_3]^+$   
 B = J591(scFv)LRRRLAHHHHHHH-Tc<sup>99m</sup>  
 C = J591(scFv)-Tc<sup>99m</sup> & Serum at 0 min  
 D = J591(scFv)-Tc<sup>99m</sup> & Serum at 15 min  
 E = J591(scFv)-Tc<sup>99m</sup> & Serum at 30 min

F = J591(scFv)-Tc<sup>99m</sup> & Serum at 60 min  
 G = J591(scFv)-Tc<sup>99m</sup> & Serum at 120 min  
 H = J591(scFv)-Tc<sup>99m</sup> & Serum at 240 min  
 I =  $[^{99m}\text{Tc}(\text{CO})_3]^+$

**Figure S33.** SDS-PAGE Coomassie staining (left) and autoradiograph (right) for the serum stability analysis of J591scFvJWT for 4 hours at 37°C.

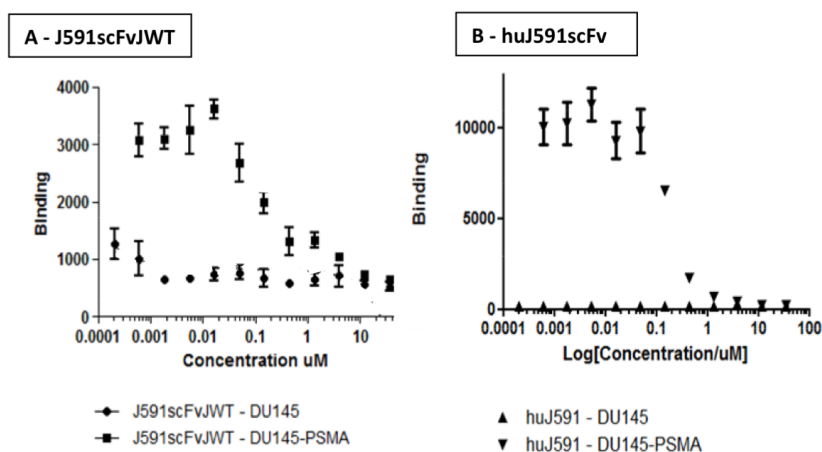

**Figure S34.** Cell binding competition assay using DU145 and DU145 PSMA positive cells. Competition is between 1 nM  $[^{99m}\text{Tc}][\text{Tc}(\text{CO})_3]^+$  labeled protein and the unlabeled protein as a cold competitor. **A)** J591scFvJWT protein, **B)** huJ591scFv protein.

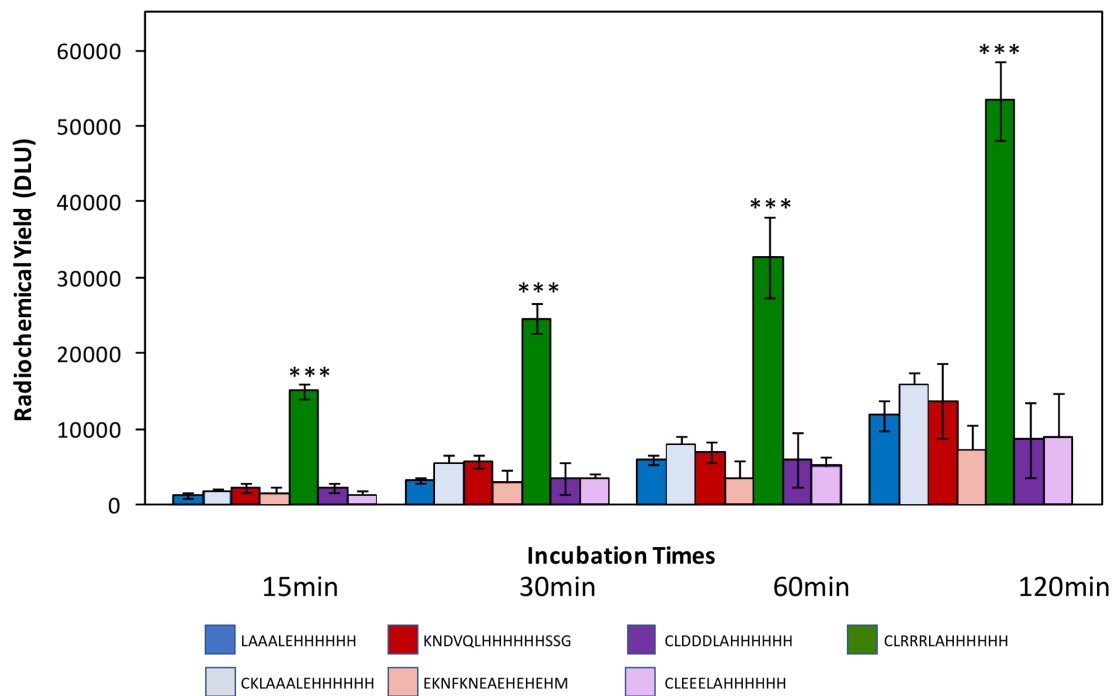

**Figure S35** Comparison of labeling efficiency of optimal (highest labeling efficiency, CLRRRLAHHHHHH, green) sequence in the array with labeling efficiencies of comparable  $^{99m}\text{Tc}$ -labeled sequences from the literature which are featured in the array. Dark blue and light blue are pairs representing the effect of adding CK;<sup>9</sup> Dark red and light red represent a comparison of HHHHHH with HEHEHE;<sup>11</sup> Dark purple and light purple represent the effect of substituting three negatively charged residues (aspartate and glutamate, respectively) for arginines in the optimized sequence. The optimized sequence has almost an order of magnitude higher labeling efficiency than the mean of the others.

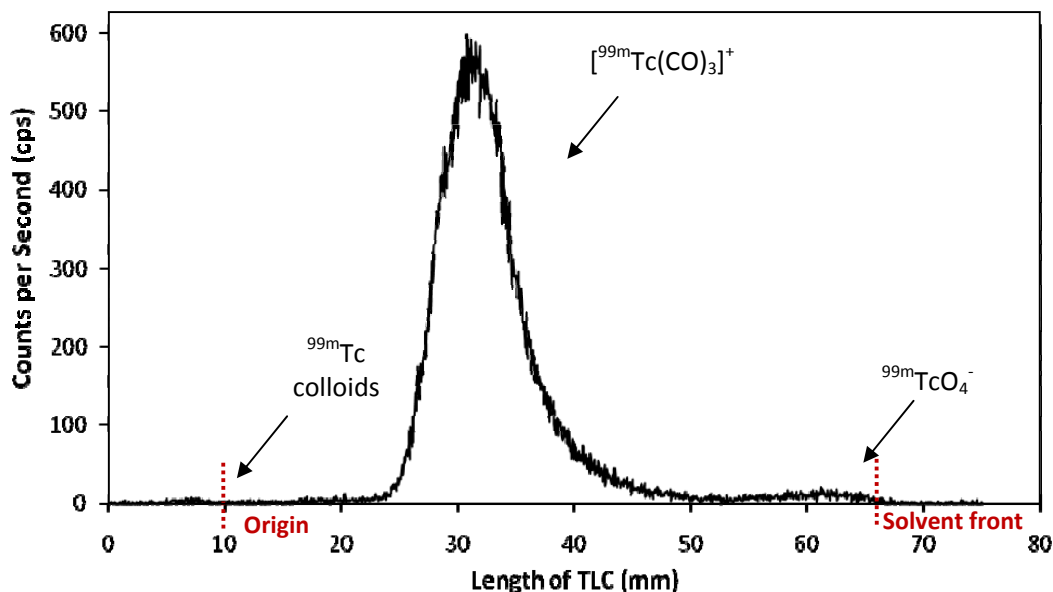

**Figure S36.** TLC quality control of  $[^{99m}\text{Tc}][\text{TcO}_4]^-$  conversion to  $[^{99m}\text{Tc}][\text{Tc}(\text{CO})_3]^+$  for use in the radiolabeling of the scFv fragments:  $R_f = 0.9$  for  $^{99m}\text{TcO}_4^-$ ,  $R_f = 0$  for  $^{99m}\text{Tc}$  colloids and  $R_f = 0.2\text{-}0.8$  for  $[^{99m}\text{Tc}(\text{CO})_3(\text{H}_2\text{O})_3]^+$ . Silica gel 60F<sub>254</sub> TLC plates (Merck Millipore, Darmstadt, Germany) with a mobile phase of 1% HCl in methanol were used.

## Methods

### Peptide synthesis

Peptides were synthesized in the Biomolecular Analysis Laboratory, University of Kent, using a PSSM-8 Multiple Peptide Synthesizer (Shimadzu). Analytical LC-ESMS was performed on a system comprising an Agilent 1200 Series Liquid Chromatography and an Agilent 6520 Accurate Mass Q-TOF mass spectrometer with a dual ESI ion source. Data analysis was carried out using the corresponding Agilent MassHunter Workstation Qualitative Analysis Software (Agilent Technologies, Cheshire, UK). Preparative HPLC was carried out using a LKB Bromma 2152 LC Controller Liquid Chromatography system (Rollabiotech, UK). The 10 Cys/His-Tag peptide analogs (Table S5) were synthesized on an automated peptide synthesizer using standard solid-state 9-fluorenylmethyloxycarbonyl (Fmoc) chemistry on a 20  $\mu\text{mol}$  scale. NovaSyn TGT resin 0.2mmol/g substitution, (Novabiochem) in dimethylformamide (DMF) was used. The Fmoc amino acids (NovaBioChem) were added in 8 fold excess. A combination of HBTU, HOBT + H<sub>2</sub>O and DIEA were used as the coupling reagents in a 1:1, 1:1, and 1:2 stoichiometric ratio to the amino acids (amino acid-reagent) respectively. Fmoc deprotection was achieved with a 30% piperidine solution in DMF. Peptide sequences were removed from the resin using 2 ml of a cleavage cocktail containing TFA:H<sub>2</sub>O:EDT:TIS in a 94:2.5:2.5:1 ratio. Incubation in the cleavage cocktail was carried out for 2 hours and precipitation of the peptide was then induced by addition of 3 x 20 ml of ice cold diethyl ether. The peptide precipitate was dried using a lyophilizer. Peptide purification was carried out by preparative RP HPLC LC-ESMS and a Vydac 218TP C-18 column using a 15 ml/min flow rate and the following gradient: time(min):%B 0:10,



5:10, 10:25, 40:75, 45:100, 50:100, 51:10, 70:10, 71:10 where A was H<sub>2</sub>O with 0.1% TFA and B was 30% H<sub>2</sub>O/70% ACN and 0.09% TFA. The purified fraction was lyophilized to provide a white solid that was stored at -80 °C. Electrospray mass spectroscopy (ESI-MS) analysis confirmed the correct molecular weight of each peptide as is shown in Table S6. The peptides were purified via HPLC and approximately 10 mg of the pure products were obtained in each case.

**Table S7.** Methodology and summary of the 10 Cys/His-tag peptide sequences synthesized for comparison of homogenous radiolabeling with array labeling. Each peptide was one of a pair with and without a CysLys dipeptide. For every pair a different number and arrangement of His residues was present. Each sequence has an identical counterpart in the solid phase array.

| Peptide Sequence | Sequence "type"                          |
|------------------|------------------------------------------|
| LAAALEHHHHHH     | Generic (His) <sub>6</sub> -Tag – HHHHHH |
| CKLAAALEHHHHHH   | Generic (His) <sub>6</sub> -Tag – HHHHHH |
| LAAALEHAHAHA     | HXHXHX                                   |
| CKLAAALEHAHAHA   | HXHXHX                                   |
| LAAALEHHHH       | Abbreviated His-Tag                      |
| CKLAAALEHHHH     | Abbreviated His-Tag                      |
| LAAALEHAHA       | HXHX                                     |
| CKLAAALEHAHA     | HXHX                                     |
| LAAALEHAAH       | HXXH                                     |
| CKLAAALEHAAH     | HXXH                                     |

**Table S8.** Summary of the ESI-MS data for the 10 synthesized Cys/His-Tag peptide sequences.

| Peptide | Peptide Sequence | Expected MW (g/mol) | Obtained MW (g/mol) |
|---------|------------------|---------------------|---------------------|
| 1       | LAAALEHHHHHH     | 1408.69             | 1408.72             |
| 2       | CKLAAALEHHHHHH   | 1639.79             | 1639.31             |
| 3       | LAAALEHAHAHA     | 1210.62             | 1210.58             |
| 4       | CKLAAALEHAHAHA   | 1441.72             | 1441.72             |
| 5       | LAAALEHHHH       | 1134.57             | 1134.59             |
| 6       | CKLAAALEHHHH     | 1365.67             | 1365.42             |
| 7       | LAAALEHAHA       | 1139.58             | 1139.38             |
| 8       | CKLAAALEHAHA     | 1370.69             | 1370.66             |
| 9       | LAAALEHAAH       | 1139.58             | 1139.60             |
| 10      | CKLAAALEHAAH     | 1370.69             | 1370.71             |

### Model protein construction, expression and purification

Protein purification was carried out using the AKTA-FPLC-900 System with a fraction collector-950 (GE Healthcare Life Sciences) using a Ni-NTA column (Superflow Cartridge, Qiagen, Manchester, UK) and a Superdex 75 HR 10/30 column (GE Healthcare, Little Chalfont, UK) for gel filtration. All buffers were prepared in-house with chemicals and solvents obtained from Sigma-Aldrich (Dorset, UK) unless otherwise specified. Sterile water was used to prepare the buffers. Vivaspin2 ultracentrifugation tubes with a 5,000 molecular weight cut-off were purchased from Sartorius (Epsom, UK) for protein concentration and protein concentration measured by UV spectrometry using a Nanodrop 2000c spectrophotometer (ThermoScientific, UK). Proteins were analyzed using SDS-PAGE analysis with NuPAGE 12% gels (Invitrogen, Paisley, UK), MOPS buffer (Life Technologies, Paisley UK) and an Invitrogen Novex Mini Cell chamber (Life Technologies). For western blot development, antiPentaHis, goat anti mouse – horse radish peroxidase (Gam:HRP) and SigmaFastDAB were obtained from Qiagen, Millipore and Sigma-Aldrich respectively. The Novex Sharp prestained protein standard for SDS-PAGE and Western Blot was obtained from Life Technologies. High performance liquid chromatography (HPLC) analysis was carried out on an Agilent 1200 series system with an in-line UV (280 nm) detector and a BioSepSEC-s 2000 (Phenomenex, Cheshire, UK) size exclusion column (SEC). DNA sequencing was performed by Beckman Coulter Genomics, Takeley, UK. For radiolabelling experiments and quality controls, materials were obtained and equipment used as previously described for the radiolabeling of the Cys/His-Tag Peptides. DU145 cells and the DU145 cells expressing PSMA (DU145-PSMA) were described previously.(14)

A single chain fragment variable (scFv) of J591 in VH-VL orientation was PCR amplified from the SFG P28z vector and subcloned into a hybrid expression vector based on pSecTag2 (Life Technologies) and pIRES-eGFP (Clontech) sequences.(15) J591JWT-CYS and J591JWT were generated by insertion of annealed overlapping oligonucleotides (Integrated DNA Technologies) with NotI/EcoRI overhangs replacing the original (His)<sub>6</sub> sequence in the expression vector.

Oligo sequences:

JWT-CYS\_forward: 5' ggccgcATGCCTGAGAAGAAGGCTGGCCCACCACCACCACCTGAG 3'

JWT-CYS reverse: 5' AATTCTCAGTGGTGGTGGTGGTGGTGGGCCAGCCTTCTTCTCAGGCATgc 3'

JWT-forward: 5' ggccgcACTGAGAAGAAGGCTGGCCCACCACCACCACCTGAG 3'

JWT- reverse: 5' gcACTGAGAAGAAGGCTGGCCCACCACCACCACCACCTGAGAATT 3'

A published, humanized sequence of the J591 scFv was synthesized (Geneart) and subcloned into the target expression vector. The sequence coding for the 6C7.1scFv was kindly provided by Prof S. Duebel, University of Braunschweig, Germany. The 6C7.1scFv sequence was PCR amplified from a source vector and subcloned into the target expression vector. 6C7.1scFv scFv with a C-terminal cysteine (6C7.1-CscFv) was used as an additional control. All sequences were verified by DNA sequencing.

For protein production, HEK393T cells were transfected with the respective expression vector and transfected cells were selected with 100 µg/ml of Zeocin. Cells were then expanded to triple layer flasks and culture supernatants containing the recombinant protein were collected.

Purification was achieved by a combination of immobilized metal ion chromatography and size exclusion chromatography. The scFvs were extracted from HEK293T culture supernatant on the AKTA-FPLC using Ni-NTA chromatography with a 5 ml Ni-NTA column using a binding buffer of 50 mM NaH<sub>2</sub>PO<sub>4</sub>, 300 mM NaCl, 10 mM imidazole, pH8, and an elution buffer of 50 mM NaH<sub>2</sub>PO<sub>4</sub>, 300 mM NaCl, 250 mM imidazole, pH8.

A size exclusion gel filtration step (SEC, Superdex 75 HR 10/30, PBS pH 7.4) using the AKTA-FPLC further purified the antibody fragments. The purified monomeric proteins in PBS at pH 7.4 were concentrated using VivaSpin membrane spin filter columns with a 5,000 molecular weight cut-off to > 0.9 mg/ml. Protein concentration was measured by UV spectrometry with a UV absorption at 280 nm using a Nanodrop spectrophotometer. A molar extinction coefficient and molecular weight of the respective protein was determined from the primary amino acid sequence using the ProtParam online tool, assuming all cysteines are present as cystines. These data are displayed in Table S7. All aliquots were stored in PBS at pH 7.4 at -80°C.

Purity of the scFv protein fragments was assessed by SDS-PAGE/Coomassie brilliant blue staining, by analytical size exclusion HPLC and a Western blot. 12% precast polyacrylamide gels (Nu-PAGE) were used to separate and visualize the proteins. A Novex Sharp prestained protein standard was used as a reference. Gels were either visualized with Coomassie Brilliant blue G250 staining or proteins were transferred to nitrocellulose membranes for subsequent Western blot detection. For Western blotting, proteins were transferred to nitrocellulose membranes and detected with anti-Penta His and goat anti mouse:HRP, with SigmaFast DAB as the HRP substrate.

**Table S9.** Extinction coefficient and molecular weight data for the primary amino acid sequence for all 7 antibody fragments expressed. The labelling sequence of each protein is also listed and its pI. Data obtained using ExPASy ProtParam online tool assuming all cysteines are present as (reduced) cysteines.

| Protein      | Extinction Coefficient (E <sub>280nm</sub> ) (M <sup>-1</sup> cm <sup>-1</sup> ) | MW <sub>monomer</sub> (kDa) | Labelling Sequence | pI of Labelling Sequence | Comments                                                  |
|--------------|----------------------------------------------------------------------------------|-----------------------------|--------------------|--------------------------|-----------------------------------------------------------|
| J591scFvJWT  | 51130                                                                            | 28.23                       | ALRRRLAHHHHHH      | 12.40                    | scFv against J591mAb with JWT-tag                         |
| J591scFv     | 51130                                                                            | 27.07                       | KRAAALEHHHHHH      | 6.62                     | scFv against J591mAb with His <sub>6</sub> -tag           |
| huJ591scFv   | 51130                                                                            | 27.28                       | IKAAALEHHHHHH      | 6.62                     | Humanised scFv against J591mAb with His <sub>6</sub> -tag |
| C67.1 scFv   | 48610                                                                            | 28.78                       | PTAAALEHHHHHH      | 6.62                     | scFv against VCAM-1 with His <sub>6</sub> tag             |
| C67.1-C scFv | 48610                                                                            | 28.89                       | TAAALEHHHHHHC      | 6.62                     | scFv against VCAM-1 with Cys/His <sub>6</sub> -tag        |

## References

1. Mees, G., Dierckx, R., Mertens, K., Vermeire, S., Van Steenkiste, M., Reutelingsperger, C., D'Asseler, Y., Peremans, K., Van Damme, N., Van de Wiele, C. (2012) <sup>99m</sup>Tc-labeled tricarbonyl his-CNA35 as an imaging agent for the detection of tumor vasculature. *J. Nucl. Med.*, 53, 464-471.
2. Shah, S. Q., Khan, A. U., Khan, M. R. (2012) <sup>99m</sup>Tc(CO)<sub>3</sub>-Ibritumomab tiuxetan, a novel radioimmunoimaging (RII) agent of B cell non-Hodgkin's lymphoma (NHL). *Biol. Chem.*, 393, 71-75.
3. Virna Cortez-Retamozo, T. L., Caveliers, V., Olive, L., Ginkam, T., Hernot, S., Packeu, A., De Vos, F., Vanhove, C., Muyldermans, S., De Baetselier, P., et al. (2008) <sup>99m</sup>Tc-labeled nanobodies: a new type of targeted probes for imaging antigen expression, *Current Radiopharmaceuticals*, 1, 37-41.

4. Teran, M. A., Martinez, E., Reyes, A. L., Paolino, A., Vital, M., Esperon, P., Pacheco, J. P., Savio, E. (2011) Biological studies in animal models using [<sup>99m</sup>Tc(CO)<sub>3</sub>]<sup>+</sup> recombinant annexin V as diagnostic agent of apoptotic processes. *Nucl. Med. Biol.*, *38*, 279-285.
5. Orlova, A., Nilsson, F. Y., Wikman, M., Widstrom, C., Stahl, S., Carlsson, J., Tolmachev, V. (2006) Comparative in vivo evaluation of technetium and iodine labels on an anti-HER2 affibody for single-photon imaging of HER2 expression in tumors. *J. Nucl. Med.*, *47*, 512-519.
6. Deyev, S. M., Waibel, R., Lebedenko, E. N., Schubiger, A. P., Pluckthun, A. (2003) Design of multivalent complexes using the barnase-barstar module. *Nat. Biotechnol.*, *21*, 1486-1492.
7. Tait, J. F., Smith, C., Gibson, D. F. (2002) Development of annexin V mutants suitable for labeling with Tc(I)-carbonyl complex. *Bioconjugate Chem.*, *13*, 1119-1123.
8. Chen, W. J., Yen, C. L., Lo, S. T., Chen, K. T., Lo, J. M. (2008) Direct <sup>99m</sup>Tc labeling of Herceptin (trastuzumab) by <sup>99m</sup>Tc(I) tricarbonyl ion. *Appl. Radiat. Isot.*, *66*, 340-345.
9. Tavare, R., Torres Martin De Rosales, R., Blower, P. J., Mullen, G. E. (2009) Efficient site-specific radiolabeling of a modified C2A domain of synaptotagmin I with [<sup>99m</sup>Tc(CO)<sub>3</sub>]<sup>+</sup>: a new radiopharmaceutical for imaging cell death. *Bioconjugate Chem.*, *20*, 2071-2081.
10. Zahnd, C., Kawe, M., Stumpp, M. T., de Pasquale, C., Tamaskovic, R., Nagy-Davidescu, G., Dreier, B., Schibli, R., Binz, H. K., Waibel, R., et al. (2010) Efficient tumor targeting with high-affinity designed ankyrin repeat proteins: effects of affinity and molecular size. *Cancer Res.*, *70*, 1595-1605.
11. Tolmachev, V., Hofstrom, C., Malmberg, J., Ahlgren, S., Hosseinimehr, S. J., Sandstrom, M., Abrahmsen, L., Orlova, A., Graslund, T. (2010) HEHEHE-tagged affibody molecule may be purified by IMAC, is conveniently labeled with [<sup>99m</sup>Tc(CO)<sub>3</sub>]<sup>+</sup>, and shows improved biodistribution with reduced hepatic radioactivity accumulation, *Bioconjugate Chem.*, *21*, 2013-2022.
12. Bidlingmaier, S., He, J., Wang, Y., An, F., Feng, J., Barbone, D., Gao, D., Franc, B., Broaddus, V. C., Liu, B. (2009) Identification of MCAM/CD146 as the target antigen of a human monoclonal antibody that recognizes both epithelioid and sarcomatoid types of mesothelioma. *Cancer Res.*, *69*, 1570-1577.
13. Berndorff, D., Borkowski, S., Moosmayer, D., Viti, F., Muller-Tiemann, B., Sieger, S., Friebe, M., Hilger, C. S., Zardi, L., Neri, D., et al. (2006) Imaging of tumor angiogenesis using <sup>99m</sup>Tc-labeled human recombinant anti-ED-B fibronectin antibody fragments. *J. Nucl. Med.*, *47*, 1707-1716.
14. Kampmeier, F., Williams, J. D., Maher, J., Mullen, G. E., Blower, P.J. (2014) Design and preclinical evaluation of a Tc-99m-labelled diabody fragment of mAb J591 for SPECT imaging of prostate specific membrane antigen (PSMA). *EJNMMI Res.*, *4*, 13.
15. Maher, J., Brentjens, R. J., Gunset, G., Riviere, I., Sadelain, M. (2002) Human T-lymphocyte cytotoxicity and proliferation directed by a single chimeric TCRzeta /CD28 receptor, *Nat. Biotechnol.*, *20*, 70-75.
